# Supplementary material for: Mitochondrial dysfunction precedes hippocampal IL-1β transcription and cognitive impairments after low-dose lipopolysaccharide injection in aged mice
Source: PubMed Central journal article supplement (PMC11002287; doi:10.1016/j.heliyon.2024.e28974), 2024-03-30
Supplement: mmc2.pdf [file mmc2.pdf]

# **Supplementary data**

## **Statistics**

# **Figure1 Statistics**

# Fig1\_B.OCR\_Basal Data analysis

## Data structure

```
str(d1)
```

```
## 'data.frame':  10 obs. of  3 variables:  
## $ subject: int  1 2 3 4 5 6 7 8 9 10  
## $ group  : chr  "young" "young" "young" "young" ...  
## $ OCR    : num  231 261 370 228 397 ...
```

## Explorative data analysis with graphics

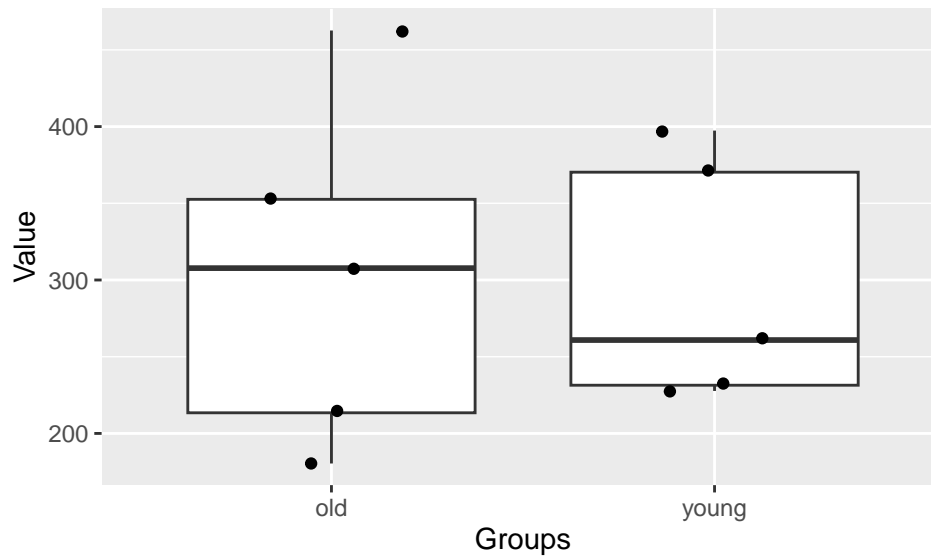

```
##  
## Welch Two Sample t-test  
##  
## data: value by group  
## t = 0.094143, df = 7.2265, p-value = 0.9276  
## alternative hypothesis: true difference in means between group old and group young is not equal to 0  
## 95 percent confidence interval:  
## -139.8266 151.4989  
## sample estimates:  
## mean in group old mean in group young  
## 303.3615 297.5253
```

```
## The result of t-test:  
## p = 0.928  
## A statistically significant difference do not exist between groups
```

# Fig1\_B.OCR\_State3 Data analysis

## Data structure

```
str(d1)
```

```
## 'data.frame':  10 obs. of  3 variables:  
## $ subject: int  1 2 3 4 5 6 7 8 9 10  
## $ group  : chr  "young" "young" "young" "young" ...  
## $ OCR    : int  711 795 1134 731 1174 521 1015 843 567 1158
```

## Explorative data analysis with graphics

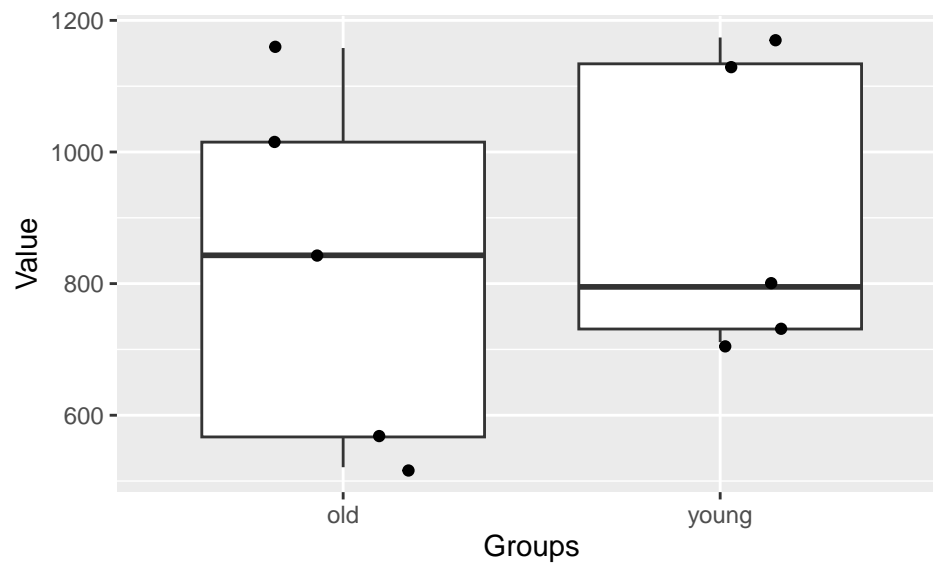

```
##  
## Welch Two Sample t-test  
##  
## data: value by group  
## t = -0.55182, df = 7.6964, p-value = 0.5967  
## alternative hypothesis: true difference in means between group old and group young is not equal to 0  
## 95 percent confidence interval:  
## -459.3239 282.9239  
## sample estimates:  
## mean in group old mean in group young  
## 820.8 909.0
```

```
## The result of t-test:  
## p = 0.597  
## A statistically significant difference do not exist between groups
```

# Fig1\_B.OCR\_State4o Data analysis

## Data structure

```
str(d1)

## 'data.frame':  10 obs. of  3 variables:
## $ subject: int  1 2 3 4 5 6 7 8 9 10
## $ group  : chr  "young" "young" "young" "young" ...
## $ OCR    : num  136 163 210 133 215 ...
```

## Explorative data analysis with graphics

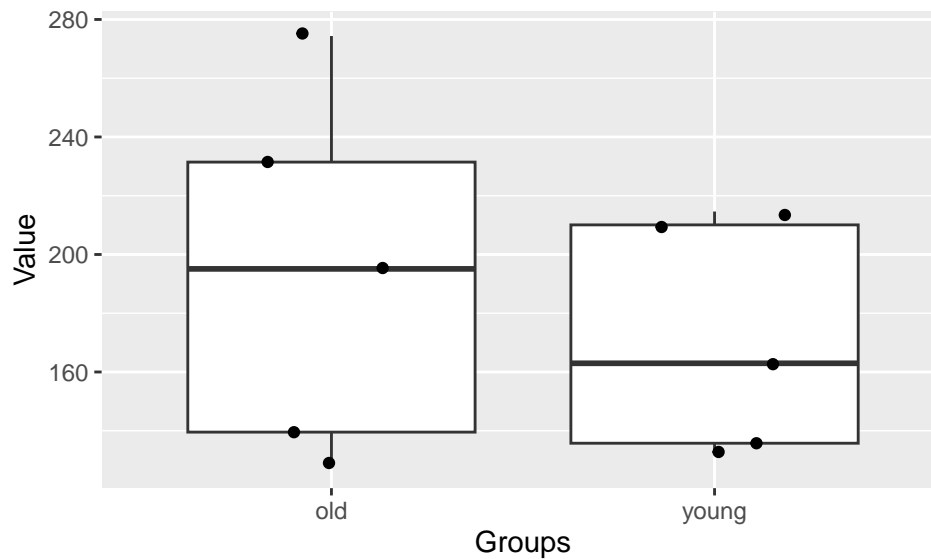

```
##
## Welch Two Sample t-test
##
## data: value by group
## t = 0.68558, df = 6.7975, p-value = 0.5157
## alternative hypothesis: true difference in means between group old and group young is not equal to 0
## 95 percent confidence interval:
## -55.40384 100.26434
## sample estimates:
## mean in group old mean in group young
## 193.6555 171.2252
```

```
## The result of t-test:  
## p = 0.516  
## A statistically significant difference do not exist between groups
```



# Fig1\_B.OCR\_State3u Data analysis

## Data structure

```
str(d1)
```

```
## 'data.frame':  10 obs. of  3 variables:  
## $ subject: int  1 2 3 4 5 6 7 8 9 10  
## $ group  : chr  "young" "young" "young" "young" ...  
## $ OCR    : num  612 699 1028 653 1053 ...
```

## Explorative data analysis with graphics

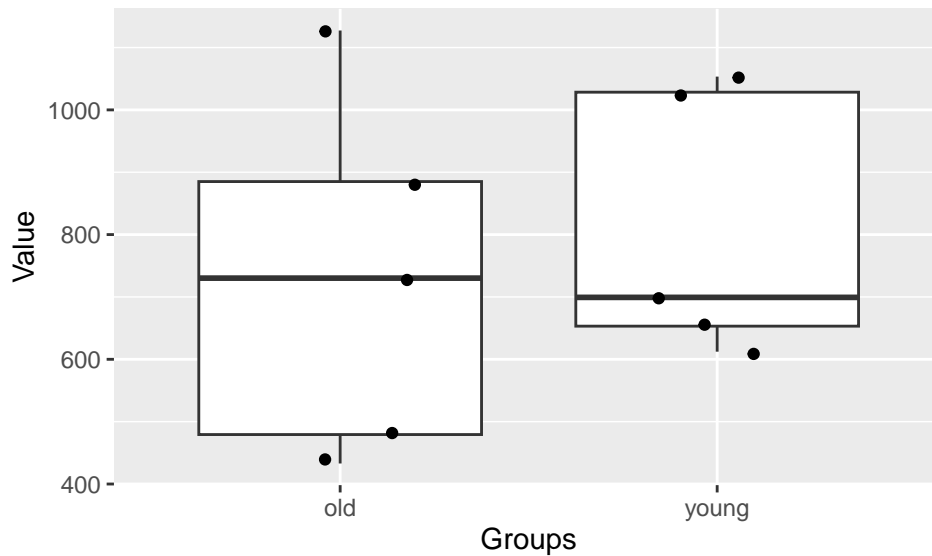

```
##  
## Welch Two Sample t-test  
##  
## data: value by group  
## t = -0.48781, df = 7.3754, p-value = 0.6399  
## alternative hypothesis: true difference in means between group old and group young is not equal to 0  
## 95 percent confidence interval:  
## -454.2312 297.5413  
## sample estimates:  
## mean in group old mean in group young  
## 730.9431 809.2881
```

```
## The result of t-test:  
## p = 0.64  
## A statistically significant difference do not exist between groups
```

# Fig1\_C.RCR Data analysis

## Data structure

```
str(d1)
```

```
## 'data.frame':  10 obs. of  3 variables:  
## $ subject: int  1 2 3 4 5 6 7 8 9 10  
## $ group  : chr  "young" "young" "young" "young" ...  
## $ RCR    : num  3.58 3.38 3.71 3.71 3.68 ...
```

## Explorative data analysis with graphics

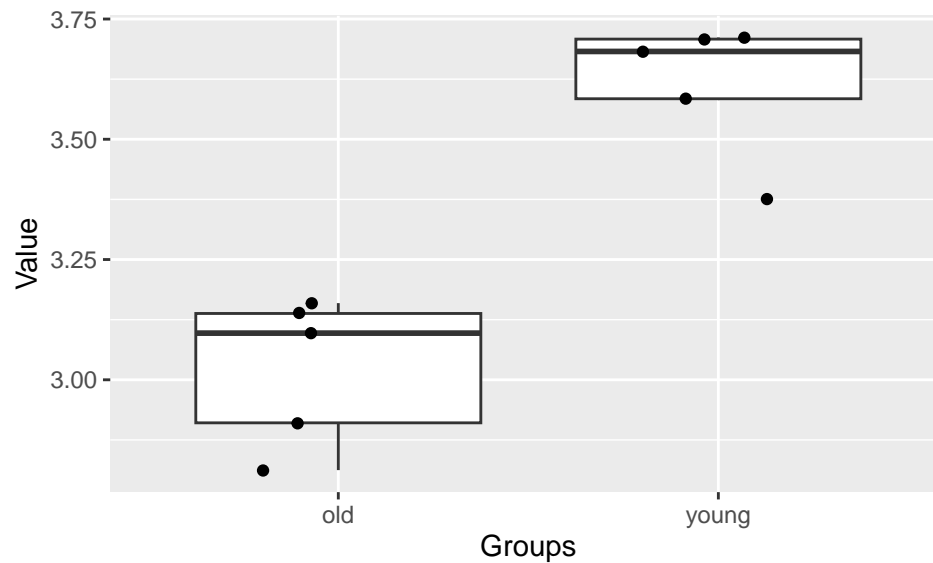

```
##  
## Welch Two Sample t-test  
##  
## data: value by group  
## t = -6.3079, df = 7.948, p-value = 0.0002372  
## alternative hypothesis: true difference in means between group old and group young is not equal to 0  
## 95 percent confidence interval:  
## -0.8049616 -0.3736136  
## sample estimates:  
## mean in group old mean in group young  
## 3.023421 3.612708
```

```
## The result of t-test:  
## p = 0  
## A statistically significant difference exist between groups
```

# Fig1\_C.RCRu Data analysis

## Data structure

```
str(d1)
```

```
## 'data.frame':  10 obs. of  3 variables:  
## $ subject: int  1 2 3 4 5 6 7 8 9 10  
## $ group  : chr  "young" "young" "young" "young" ...  
## $ RCRu   : num  3.14 3.02 3.4 3.36 3.35 ...
```

## Explorative data analysis with graphics

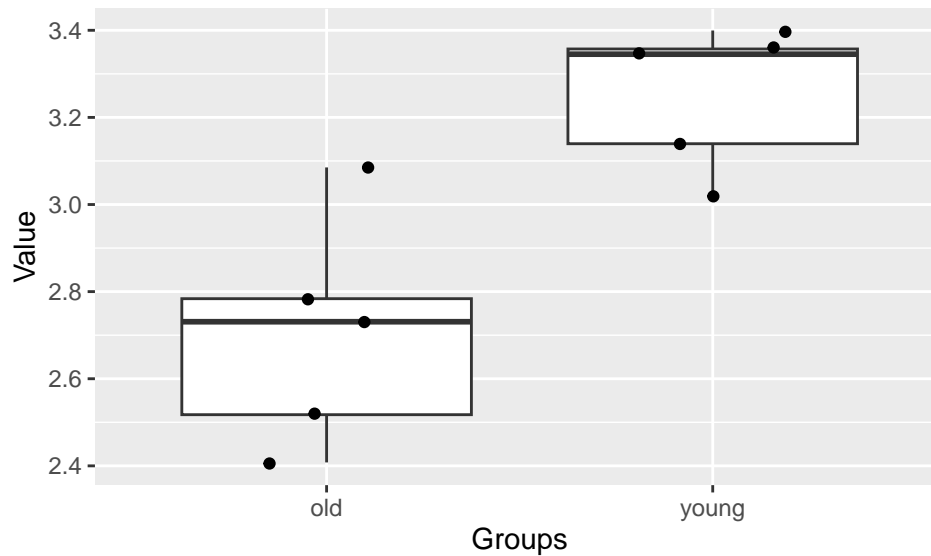

```
##  
## Welch Two Sample t-test  
##  
## data:  value by group  
## t = -3.9502, df = 6.7345, p-value = 0.005976  
## alternative hypothesis: true difference in means between group old and group young is not equal to 0  
## 95 percent confidence interval:  
## -0.8769982 -0.2169100  
## sample estimates:  
## mean in group old mean in group young  
## 2.705039 3.251993
```

```
## The result of t-test:  
## p = 0.006  
## A statistically significant difference exist between groups
```

# Fig1\_D.Western Blot\_ATP5A Data analysis

## Data structure

```
str(d1)
```

```
## 'data.frame':  10 obs. of  3 variables:  
## $ subject: int  1 2 3 4 5 6 7 8 9 10  
## $ group  : chr  "young" "young" "young" "young" ...  
## $ ATP5A  : num  0.884 1.103 1.016 0.818 1.18 ...
```

## Explorative data analysis with graphics

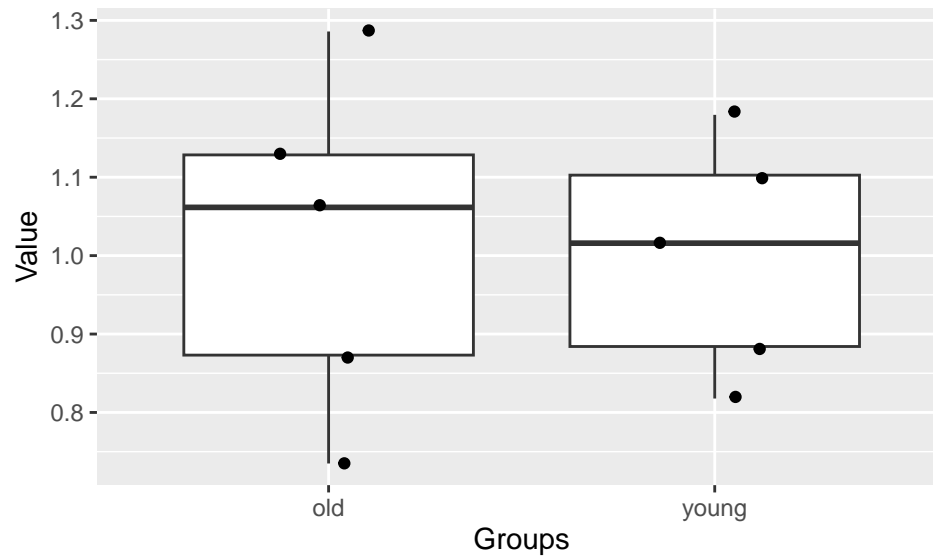

```
##  
## Welch Two Sample t-test  
##  
## data:  value by group  
## t = 0.14269, df = 7.1192, p-value = 0.8905  
## alternative hypothesis: true difference in means between group old and group young is not equal to 0  
## 95 percent confidence interval:  
## -0.2603641  0.2939254  
## sample estimates:  
## mean in group old mean in group young  
## 1.016781 1.000000
```

```
## The result of t-test:  
## p = 0.89  
## A statistically significant difference do not exist between groups
```



# Fig1\_D.Western Blot\_UQCRC2 Data analysis

## Data structure

```
str(d1)
```

```
## 'data.frame':  10 obs. of  3 variables:  
## $ subject: int  1 2 3 4 5 6 7 8 9 10  
## $ group  : chr  "young" "young" "young" "young" ...  
## $ UQCRC2 : num  0.865 1.089 1.041 0.88 1.124 ...
```

## Explorative data analysis with graphics

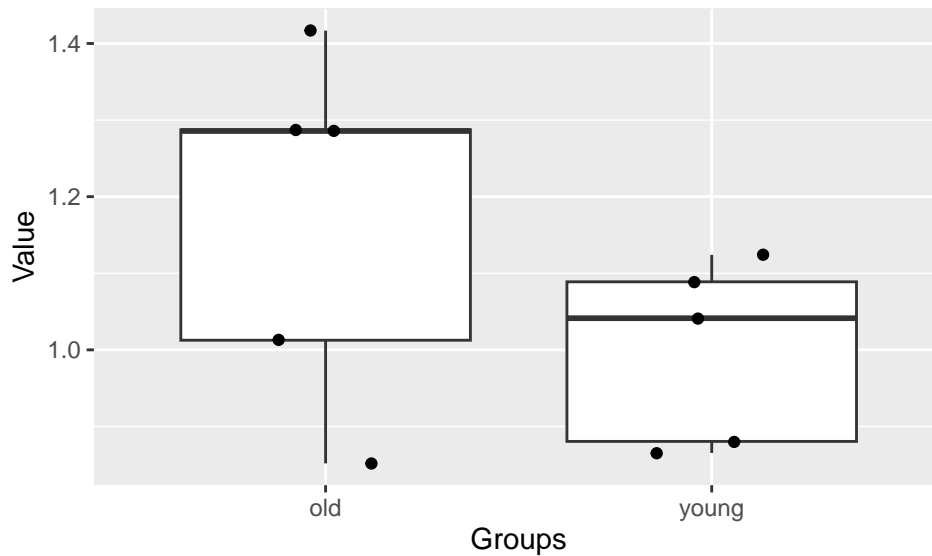

```
##  
## Welch Two Sample t-test  
##  
## data:  value by group  
## t = 1.4662, df = 5.9999, p-value = 0.193  
## alternative hypothesis: true difference in means between group old and group young is not equal to 0  
## 95 percent confidence interval:  
## -0.1142738  0.4559622  
## sample estimates:  
## mean in group old mean in group young  
##      1.170844      1.000000
```

```
## The result of t-test:  
## p = 0.193  
## A statistically significant difference do not exist between groups
```

# Fig1\_D.Western Blot\_SDHB Data analysis

## Data structure

```
str(d1)
```

```
## 'data.frame':  10 obs. of  3 variables:  
## $ subject: int  1 2 3 4 5 6 7 8 9 10  
## $ group  : chr  "young" "young" "young" "young" ...  
## $ SDHB   : num  0.621 0.965 1.112 1.117 1.185 ...
```

## Explorative data analysis with graphics

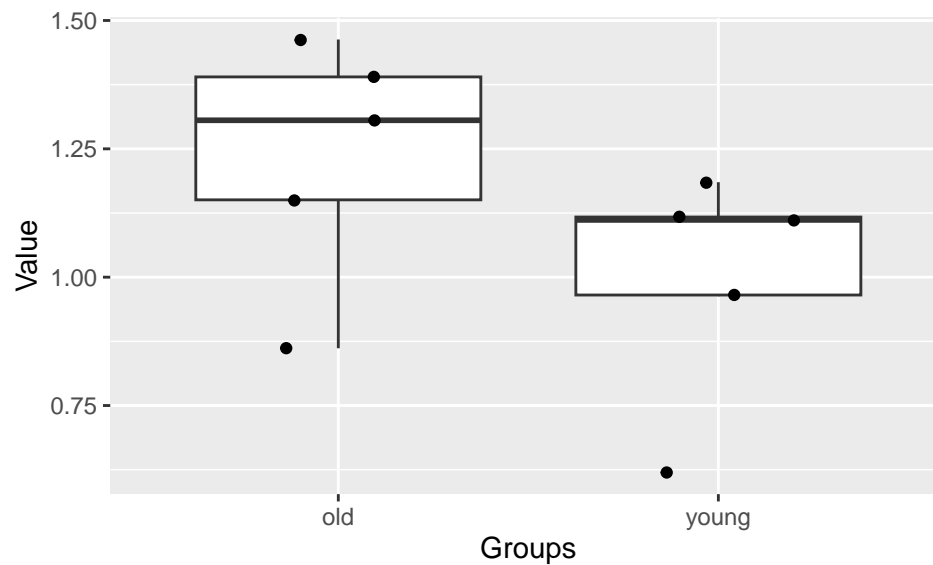

```
##  
## Welch Two Sample t-test  
##  
## data:  value by group  
## t = 1.5919, df = 7.9784, p-value = 0.1502  
## alternative hypothesis: true difference in means between group old and group young is not equal to 0  
## 95 percent confidence interval:  
## -0.1052128  0.5735445  
## sample estimates:  
## mean in group old mean in group young  
## 1.234166 1.000000
```

```
## The result of t-test:  
## p = 0.15  
## A statistically significant difference do not exist between groups
```

# Fig1\_D.Western Blot\_NDUFB8 Data analysis

## Data structure

```
str(d1)
```

```
## 'data.frame':  10 obs. of  3 variables:  
## $ subject: int  1 2 3 4 5 6 7 8 9 10  
## $ group  : chr  "young" "young" "young" "young" ...  
## $ NDUFB8 : num  0.905 1.151 1.053 0.936 0.955 ...
```

## Explorative data analysis with graphics

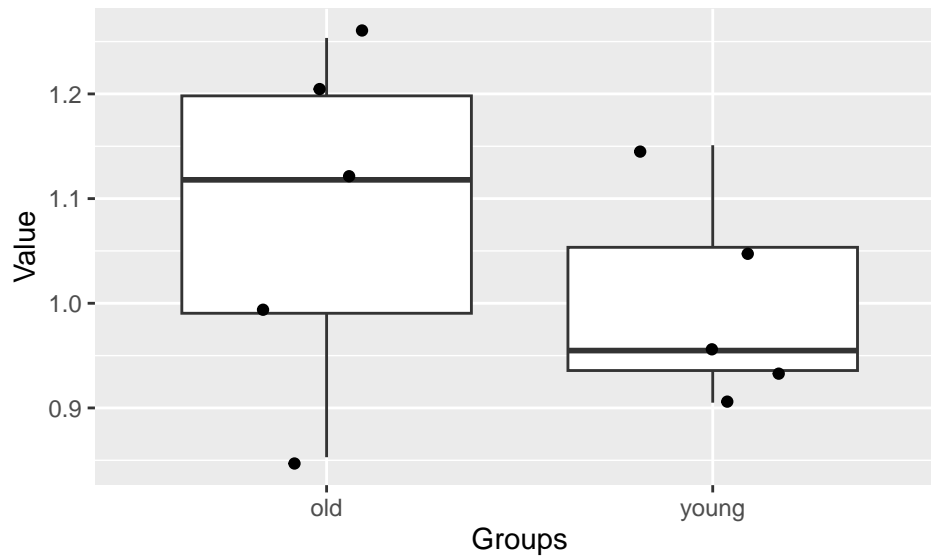

```
##  
## Welch Two Sample t-test  
##  
## data:  value by group  
## t = 0.96696, df = 6.7023, p-value = 0.3672  
## alternative hypothesis: true difference in means between group old and group young is not equal to 0  
## 95 percent confidence interval:  
## -0.1212025  0.2863712  
## sample estimates:  
## mean in group old mean in group young  
## 1.082584 1.000000
```

```
## The result of t-test:  
## p = 0.367  
## A statistically significant difference do not exist between groups
```

# Fig1\_E.Western Blot\_OPA1 Data analysis

## Data structure

```
str(d1)
```

```
## 'data.frame':  10 obs. of  3 variables:  
## $ subject: int  1 2 3 4 5 6 7 8 9 10  
## $ group  : chr  "young" "young" "young" "young" ...  
## $ OPA1   : num  0.941 0.935 1.066 0.923 1.135 ...
```

## Explorative data analysis with graphics

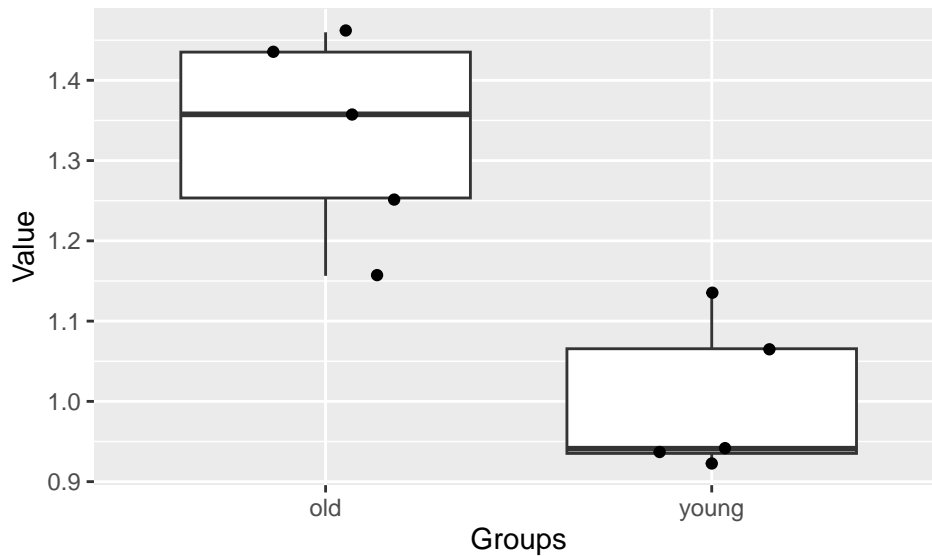

```
##  
## Welch Two Sample t-test  
##  
## data:  value by group  
## t = 4.6848, df = 7.4054, p-value = 0.001934  
## alternative hypothesis: true difference in means between group old and group young is not equal to 0  
## 95 percent confidence interval:  
##  0.1665029 0.4984414  
## sample estimates:  
##  mean in group old mean in group young  
##      1.332472      1.000000
```

```
## The result of t-test:  
## p = 0.002  
## A statistically significant difference exist between groups
```



# Fig1\_E.Western Blot\_DRP1 Data analysis

## Data structure

```
str(d1)
```

```
## 'data.frame':  10 obs. of  3 variables:  
## $ subject: int  1 2 3 4 5 6 7 8 9 10  
## $ group  : chr  "young" "young" "young" "young" ...  
## $ DRP1   : num  1.152 1.197 0.961 0.847 0.843 ...
```

## Explorative data analysis with graphics

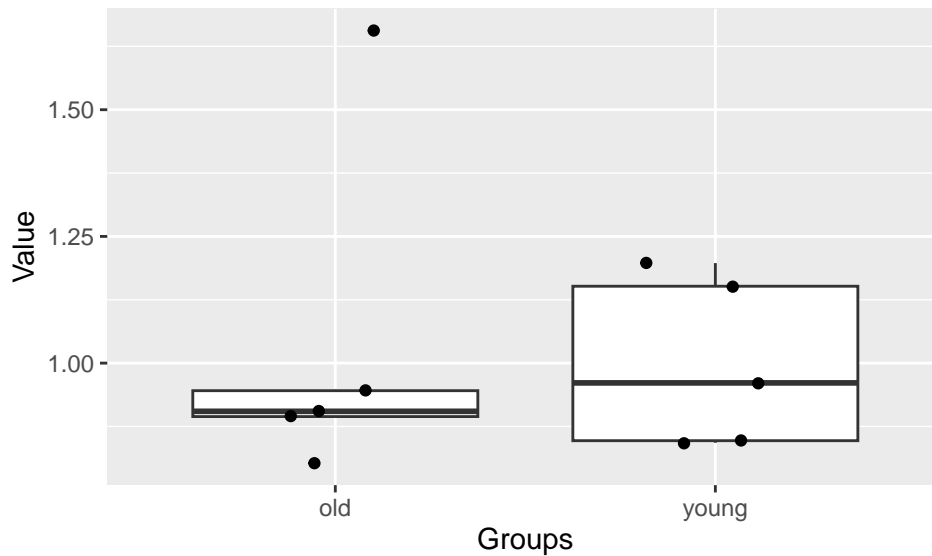

```
##  
## Welch Two Sample t-test  
##  
## data:  value by group  
## t = 0.23546, df = 5.7486, p-value = 0.822  
## alternative hypothesis: true difference in means between group old and group young is not equal to 0  
## 95 percent confidence interval:  
## -0.3863733  0.4676892  
## sample estimates:  
## mean in group old mean in group young  
## 1.040658 1.000000
```

```
## The result of t-test:  
## p = 0.822  
## A statistically significant difference do not exist between groups
```

# Fig1\_E.Western Blot\_MFN2 Data analysis

## Data structure

```
str(d1)
```

```
## 'data.frame':  10 obs. of  3 variables:  
## $ subject: int  1 2 3 4 5 6 7 8 9 10  
## $ group  : chr  "young" "young" "young" "young" ...  
## $ MFN2   : num  0.626 1.078 1.062 1.031 1.203 ...
```

## Explorative data analysis with graphics

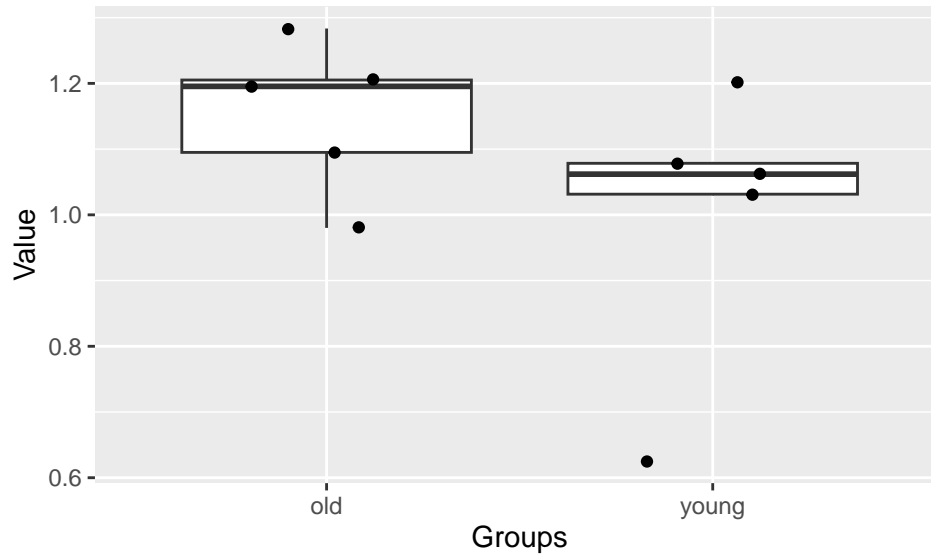

```
##  
## Welch Two Sample t-test  
##  
## data:  value by group  
## t = 1.3666, df = 6.1101, p-value = 0.2199  
## alternative hypothesis: true difference in means between group old and group young is not equal to 0  
## 95 percent confidence interval:  
## -0.1188395  0.4225167  
## sample estimates:  
## mean in group old mean in group young  
## 1.151839 1.000000
```

```
## The result of t-test:  
## p = 0.22  
## A statistically significant difference do not exist between groups
```

# Fig1\_E.Western Blot\_MFN1 Data analysis

## Data structure

```
str(d1)
```

```
## 'data.frame':  10 obs. of  3 variables:  
## $ subject: int  1 2 3 4 5 6 7 8 9 10  
## $ group  : chr  "young" "young" "young" "young" ...  
## $ MFN1   : num  1.035 0.99 0.911 0.965 1.1 ...
```

## Explorative data analysis with graphics

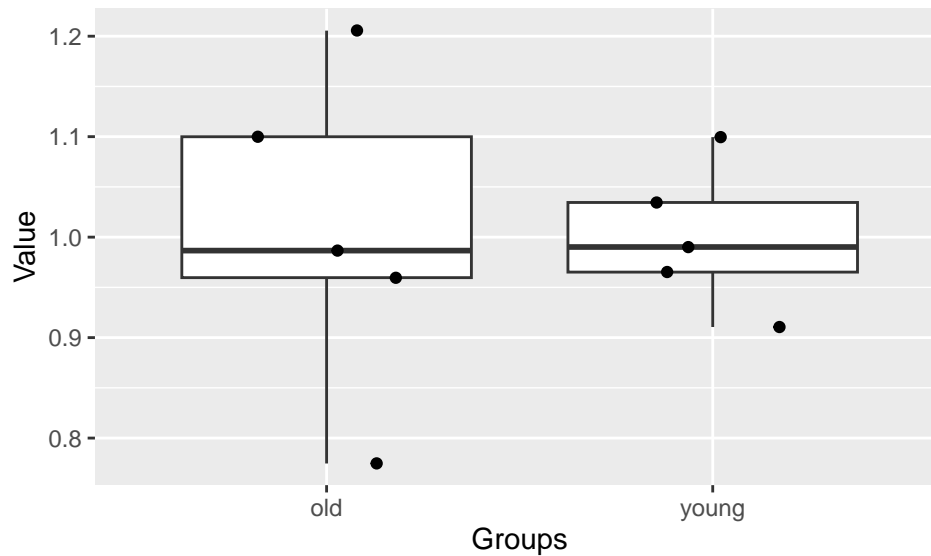

```
##  
## Welch Two Sample t-test  
##  
## data:  value by group  
## t = 0.066959, df = 5.5024, p-value = 0.949  
## alternative hypothesis: true difference in means between group old and group young is not equal to 0  
## 95 percent confidence interval:  
## -0.1925198  0.2031096  
## sample estimates:  
## mean in group old mean in group young  
## 1.005295 1.000000
```

```
## The result of t-test:  
## p = 0.949  
## A statistically significant difference do not exist between groups
```

# Figure2 Statistics

## Fig2\_B.LPS post24hr\_OCR\_old\_Basal Data analysis

### Data structure

```
str(d1)

## 'data.frame':  9 obs. of  4 variables:
## $ subject: int  1 2 3 4 5 6 7 8 9
## $ group  : chr  "con" "con" "con" "con" ...
## $ OCR    : num  167 160 207 201 210 ...
## $ X      : logi  NA NA NA NA NA NA ...
```

### Explorative data analysis with graphics

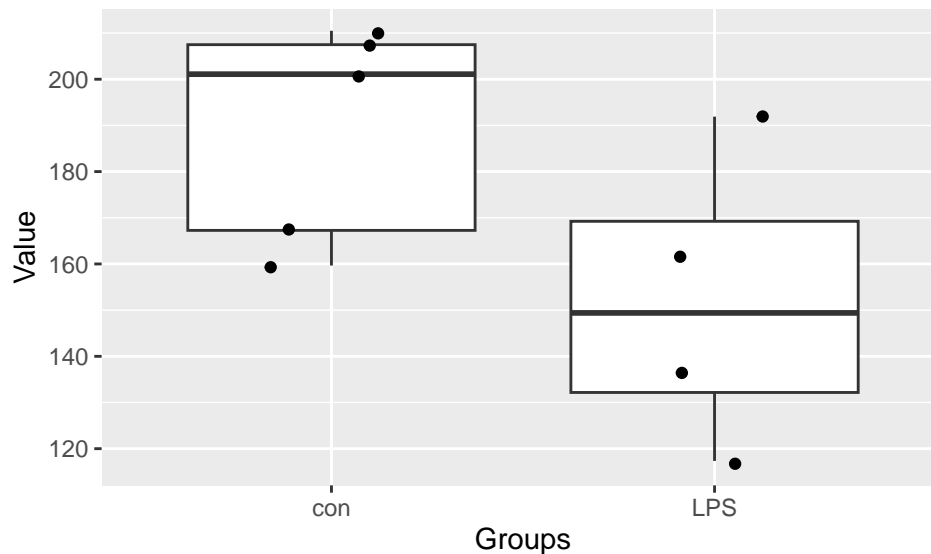

```
##
## Welch Two Sample t-test
##
## data:  value by group
## t = 1.9254, df = 5.4358, p-value = 0.1075
## alternative hypothesis: true difference in means between group con and group LPS is not equal to 0
## 95 percent confidence interval:
## -11.28982  85.67202
## sample estimates:
## mean in group con mean in group LPS
##      189.2001      152.0090
```



```
## The result of t-test:  
## p = 0.108  
## A statistically significant difference do not exist between groups
```

## Fig2\_B.LPS post24hr\_OCR\_old\_State3 Data analysis

### Data structure

```
str(d1)
```

```
## 'data.frame':  9 obs. of  4 variables:  
## $ subject: int  1 2 3 4 5 6 7 8 9  
## $ group  : chr  "con" "con" "con" "con" ...  
## $ OCR    : num  608 523 576 784 708 ...  
## $ X      : logi  NA NA NA NA NA NA ...
```

### Explorative data analysis with graphics

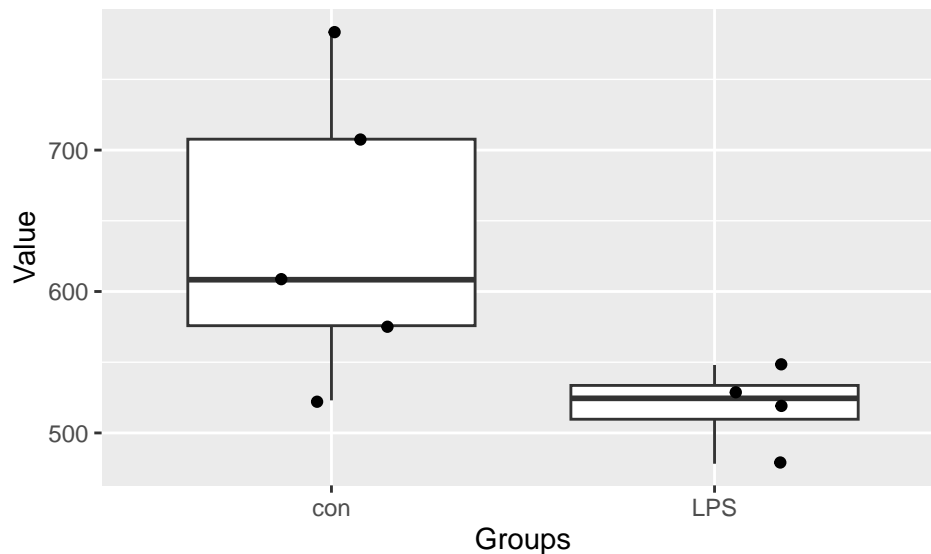

```
##  
## Welch Two Sample t-test  
##  
## data: value by group  
## t = 2.4565, df = 4.7626, p-value = 0.05994  
## alternative hypothesis: true difference in means between group con and group LPS is not equal to 0  
## 95 percent confidence interval:  
## -7.54393 249.64847  
## sample estimates:  
## mean in group con mean in group LPS  
## 639.8603 518.8080
```

```
## The result of t-test:  
## p = 0.06  
## A statistically significant difference do not exist between groups
```

## Fig2\_B.LPS post24hr\_OCR\_old\_State4o Data analysis

### Data structure

```
str(d1)
```

```
## 'data.frame':  9 obs. of  4 variables:  
## $ subject: int  1 2 3 4 5 6 7 8 9  
## $ group  : chr  "con" "con" "con" "con" ...  
## $ OCR    : num  133 120 143 180 147 ...  
## $ X      : logi  NA NA NA NA NA NA ...
```

### Explorative data analysis with graphics

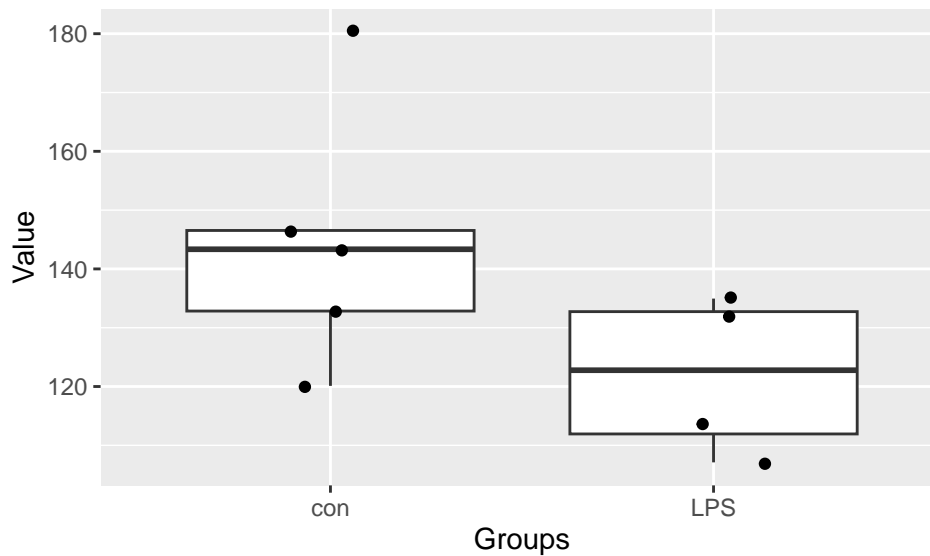

```
##  
## Welch Two Sample t-test  
##  
## data: value by group  
## t = 1.8694, df = 6.6525, p-value = 0.106  
## alternative hypothesis: true difference in means between group con and group LPS is not equal to 0  
## 95 percent confidence interval:  
## -6.336678 51.851024  
## sample estimates:  
## mean in group con mean in group LPS  
## 144.6554 121.8983
```

```
## The result of t-test:  
## p = 0.106  
## A statistically significant difference do not exist between groups
```

## Fig2\_B.LPS post24\_OCR\_old\_State3u Data analysis

### Data structure

```
str(d1)

## 'data.frame':  9 obs. of  4 variables:
## $ subject: int  1 2 3 4 5 6 7 8 9
## $ group  : chr  "con" "con" "con" "con" ...
## $ OCR    : num  563 508 561 683 595 ...
## $ X      : logi  NA NA NA NA NA NA ...
```

### Explorative data analysis with graphics

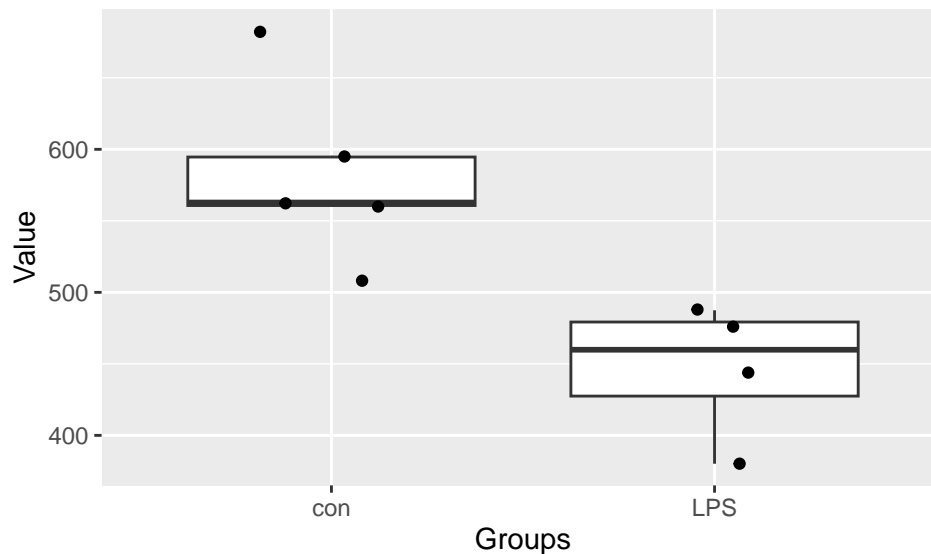

```
##
## Welch Two Sample t-test
##
## data:  value by group
## t = 3.5871, df = 6.9918, p-value = 0.008909
## alternative hypothesis: true difference in means between group con and group LPS is not equal to 0
## 95 percent confidence interval:
##  45.96901 223.92632
## sample estimates:
## mean in group con mean in group LPS
##      581.7870      446.8393
```

```
## The result of t-test:  
## p = 0.009  
## A statistically significant difference exist between groups
```

## Fig2\_C.LPS post24hr\_old\_RCR Data analysis

### Data structure

```
str(d1)

## 'data.frame':  9 obs. of  4 variables:
## $ subject: int  1 2 3 4 5 6 7 8 9
## $ group  : chr  "con" "con" "con" "con" ...
## $ RCR    : num  4.58 4.35 4.02 4.35 4.83 ...
## $ X      : logi  NA NA NA NA NA NA ...
```

### Explorative data analysis with graphics

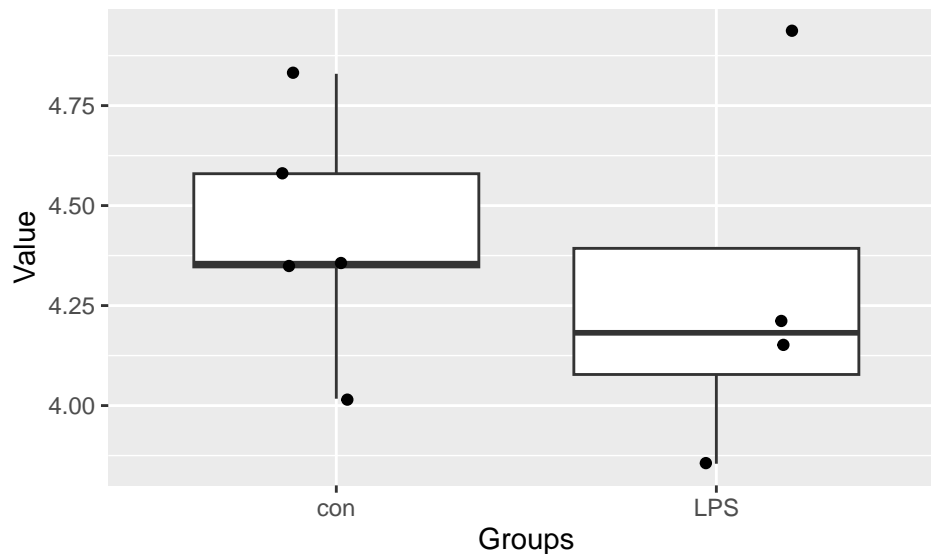

```
##
## Welch Two Sample t-test
##
## data: value by group
## t = 0.51289, df = 4.9858, p-value = 0.6299
## alternative hypothesis: true difference in means between group con and group LPS is not equal to 0
## 95 percent confidence interval:
## -0.5489819 0.8223602
## sample estimates:
## mean in group con mean in group LPS
## 4.425566 4.288877
```



```
## The result of t-test:  
## p = 0.63  
## A statistically significant difference do not exist between groups
```

## Fig2\_C.LPS post24hr\_old\_RCRu Data analysis

### Data structure

```
str(d1)

## 'data.frame':  9 obs. of  4 variables:
## $ subject: int  1 2 3 4 5 6 7 8 9
## $ group  : chr  "con" "con" "con" "con" ...
## $ RCRu   : num  3.03 2.54 2.73 2.89 2.92 ...
## $ X      : logi  NA NA NA NA NA NA ...
```

### Explorative data analysis with graphics

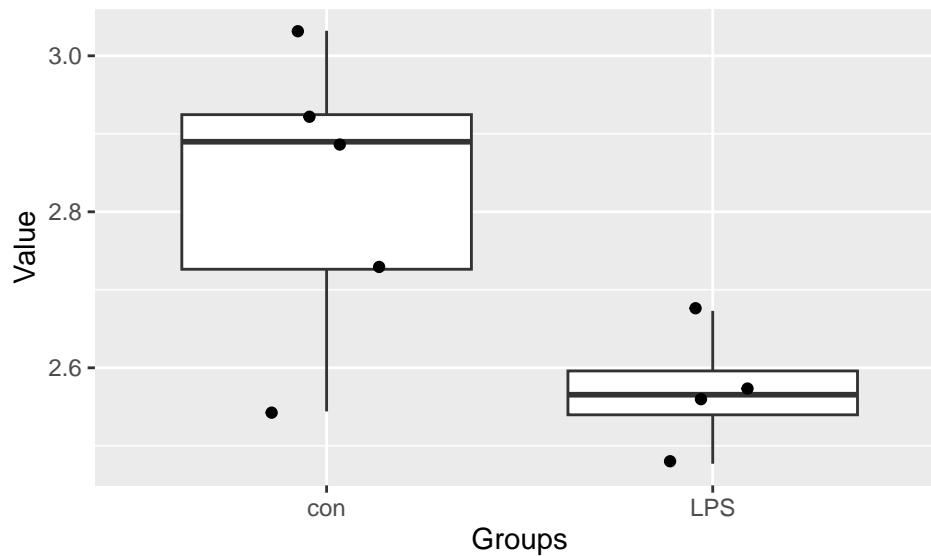

```
##
## Welch Two Sample t-test
##
## data:  value by group
## t = 2.6842, df = 5.601, p-value = 0.03889
## alternative hypothesis: true difference in means between group con and group LPS is not equal to 0
## 95 percent confidence interval:
##  0.01833579 0.48798212
## sample estimates:
## mean in group con mean in group LPS
##      2.823385      2.570226
```

```
## The result of t-test:  
## p = 0.039  
## A statistically significant difference does not exist between groups
```

## Fig2\_E.LPS post24hr\_OCR\_young\_Basal Data analysis

### Data structure

```
str(d1)
```

```
## 'data.frame':  10 obs. of  4 variables:  
## $ subject: int  1 2 3 4 5 6 7 8 9 10  
## $ group  : chr  "con" "con" "con" "con" ...  
## $ OCR    : num  277 301 374 342 438 ...  
## $ X      : logi  NA NA NA NA NA NA ...
```

### Explorative data analysis with graphics

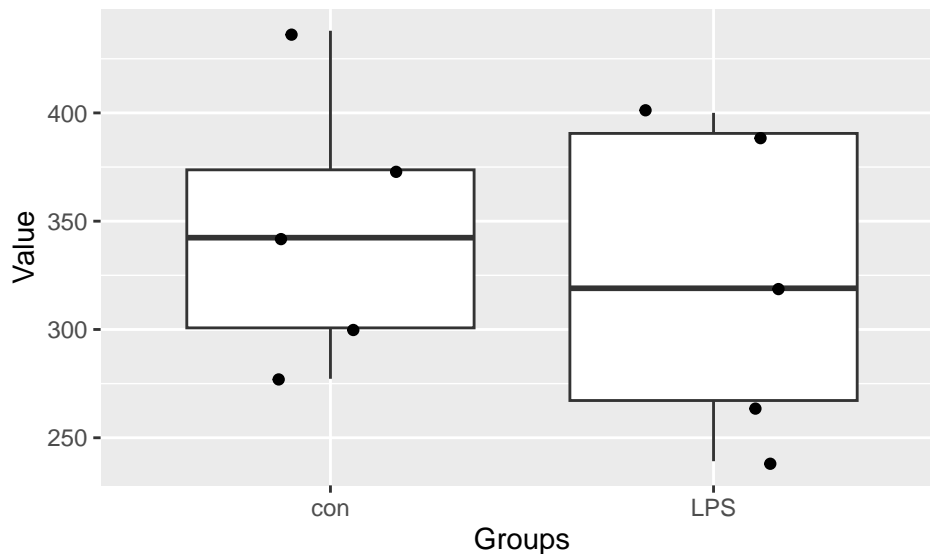

```
##  
## Welch Two Sample t-test  
##  
## data: value by group  
## t = 0.54216, df = 7.8739, p-value = 0.6027  
## alternative hypothesis: true difference in means between group con and group LPS is not equal to 0  
## 95 percent confidence interval:  
## -75.79161 122.21432  
## sample estimates:  
## mean in group con mean in group LPS  
## 346.4033 323.1919
```

```
## The result of t-test:  
## p = 0.603  
## A statistically significant difference do not exist between groups
```

## Fig2\_E.LPS post24hr\_OCR\_young\_State3 Data analysis

### Data structure

```
str(d1)
```

```
## 'data.frame':  10 obs. of  3 variables:  
## $ subject: int  1 2 3 4 5 6 7 8 9 10  
## $ group  : chr  "con" "con" "con" "con" ...  
## $ OCR    : num  801 1010 1201 1106 1080 ...
```

### Explorative data analysis with graphics

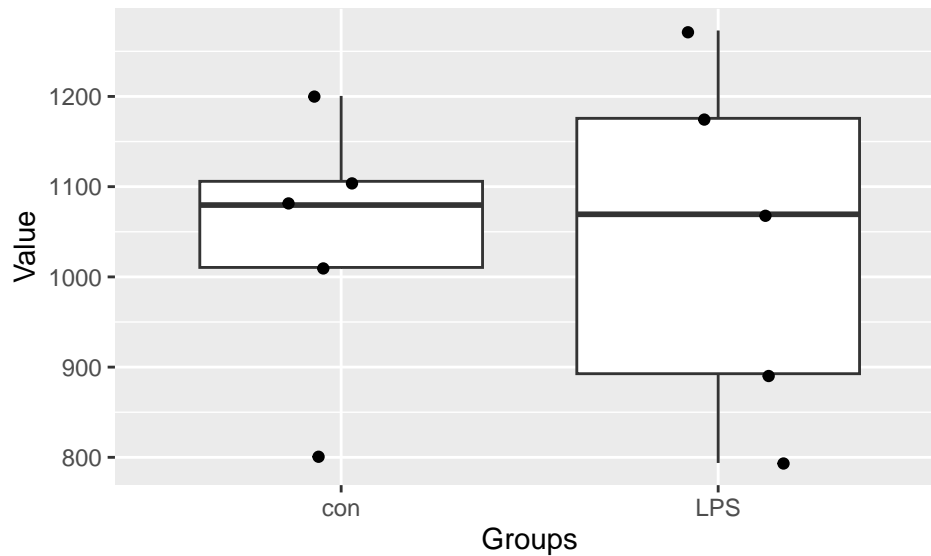

```
##  
## Welch Two Sample t-test  
##  
## data: value by group  
## t = -0.012396, df = 7.4552, p-value = 0.9904  
## alternative hypothesis: true difference in means between group con and group LPS is not equal to 0  
## 95 percent confidence interval:  
## -260.1542 257.4074  
## sample estimates:  
## mean in group con mean in group LPS  
## 1039.559 1040.933
```

```
## The result of t-test:  
## p = 0.99  
## A statistically significant difference do not exist between groups
```

## Fig2\_E.LPS post24hr\_OCR\_young\_State4o Data analysis

### Data structure

```
str(d1)
```

```
## 'data.frame':  10 obs. of  3 variables:  
## $ subject: int  1 2 3 4 5 6 7 8 9 10  
## $ group  : chr  "con" "con" "con" "con" ...  
## $ OCR    : num  199 208 255 228 262 ...
```

### Explorative data analysis with graphics

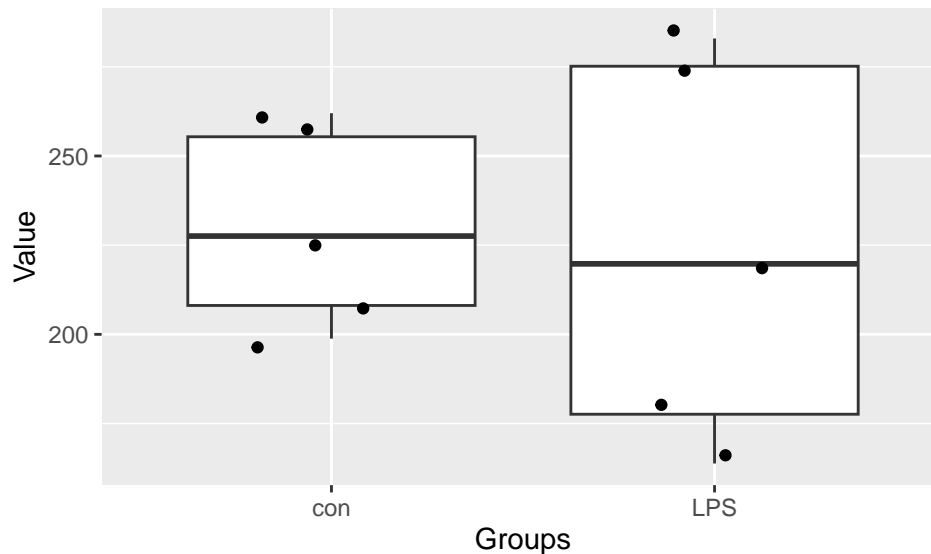

```
##  
## Welch Two Sample t-test  
##  
## data: value by group  
## t = 0.23773, df = 5.9684, p-value = 0.82  
## alternative hypothesis: true difference in means between group con and group LPS is not equal to 0  
## 95 percent confidence interval:  
## -60.61325 73.64014  
## sample estimates:  
## mean in group con mean in group LPS  
## 230.3629 223.8495
```



```
## The result of t-test:  
## p = 0.82  
## A statistically significant difference do not exist between groups
```

## Fig2\_E.LPS post24hr\_OCR\_young\_State3u Data analysis

### Data structure

```
str(d1)
```

```
## 'data.frame':  10 obs. of  3 variables:  
## $ subject: int  1 2 3 4 5 6 7 8 9 10  
## $ group  : chr  "con" "con" "con" "con" ...  
## $ OCR    : num  669 972 1069 943 1058 ...
```

### Explorative data analysis with graphics

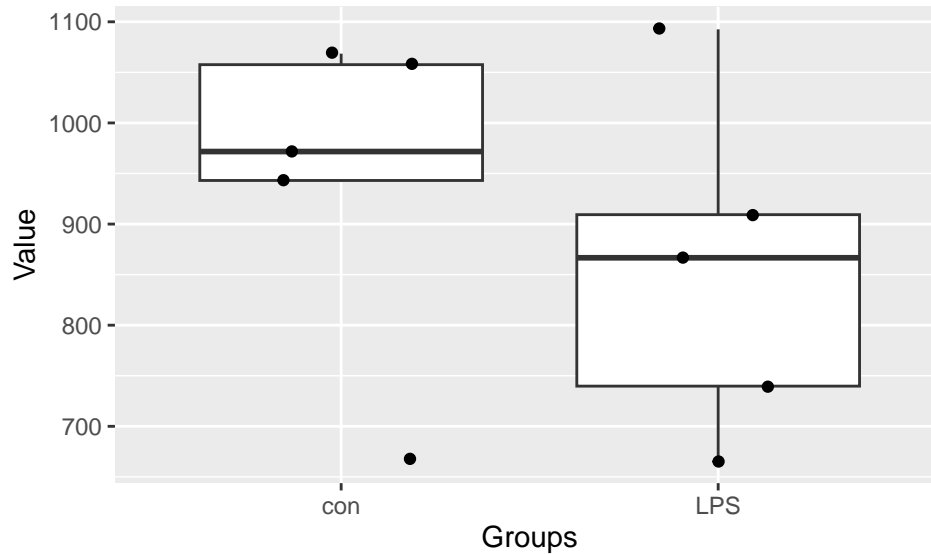

```
##  
## Welch Two Sample t-test  
##  
## data:  value by group  
## t = 0.8429, df = 7.9978, p-value = 0.4238  
## alternative hypothesis: true difference in means between group con and group LPS is not equal to 0  
## 95 percent confidence interval:  
## -151.1625  325.3185  
## sample estimates:  
## mean in group con mean in group LPS  
##          941.9361          854.8581
```

```
## The result of t-test:  
## p = 0.424  
## A statistically significant difference do not exist between groups
```

## Fig2\_F.LPS post24hr\_young\_RCR Data analysis

### Data structure

```
str(d1)
```

```
## 'data.frame':  10 obs. of  3 variables:  
## $ subject: int  1 2 3 4 5 6 7 8 9 10  
## $ group  : chr  "con" "con" "con" "con" ...  
## $ RCR    : num  2.97 3.49 3.34 3.44 3.1 ...
```

### Explorative data analysis with graphics

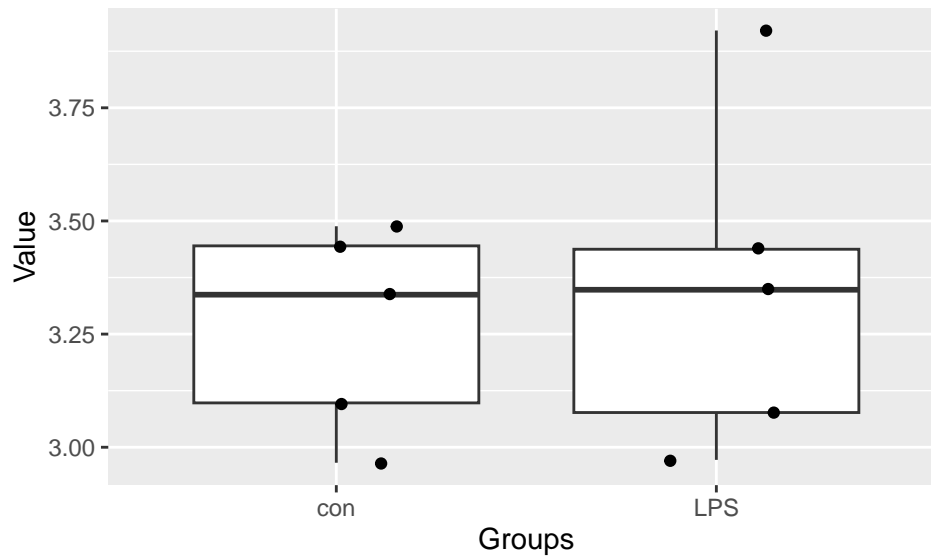

```
##  
## Welch Two Sample t-test  
##  
## data:  value by group  
## t = -0.43315, df = 6.6133, p-value = 0.6787  
## alternative hypothesis: true difference in means between group con and group LPS is not equal to 0  
## 95 percent confidence interval:  
## -0.5493834  0.3809771  
## sample estimates:  
## mean in group con mean in group LPS  
##          3.266804          3.351007
```

```
## The result of t-test:  
## p = 0.679  
## A statistically significant difference do not exist between groups
```

## Fig2\_F.LPS post24hr\_young\_RCRu Data analysis

### Data structure

```
str(d1)
```

```
## 'data.frame':  10 obs. of  3 variables:  
## $ subject: int  1 2 3 4 5 6 7 8 9 10  
## $ group  : chr  "con" "con" "con" "con" ...  
## $ RCRu   : num  2.53 3.37 3.01 2.99 3.04 ...
```

### Explorative data analysis with graphics

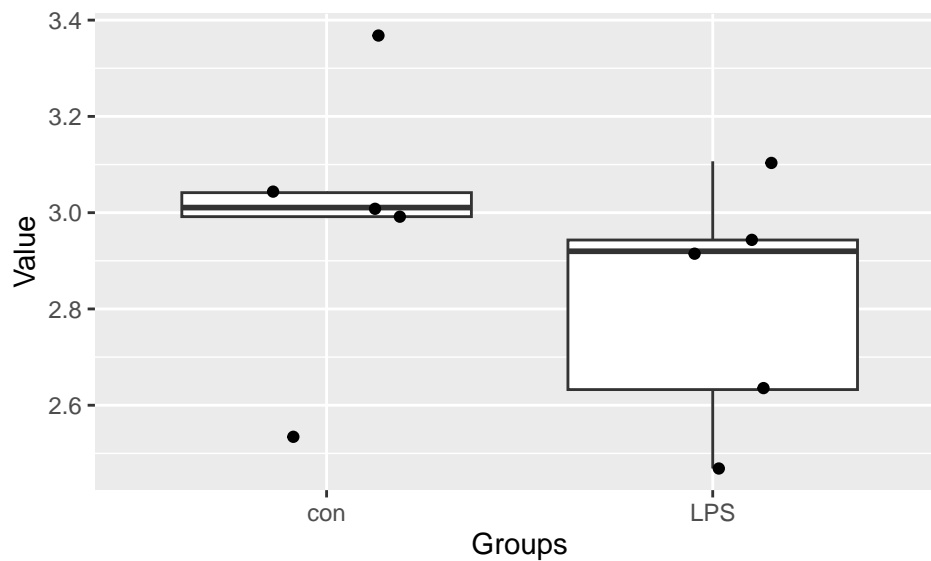

```
##  
## Welch Two Sample t-test  
##  
## data: value by group  
## t = 0.99281, df = 7.8393, p-value = 0.3505  
## alternative hypothesis: true difference in means between group con and group LPS is not equal to 0  
## 95 percent confidence interval:  
## -0.2327196 0.5824039  
## sample estimates:  
## mean in group con mean in group LPS  
## 2.989065 2.814222
```

```
## The result of t-test:  
## p = 0.35  
## A statistically significant difference do not exist between groups
```

# Fig2\_G.LPS post6hr\_qPCR\_old\_TNFalpha\_Data analysis

Boohwi Hong

```
## Present data is ** LPS post6hr_qPCR_old_TNFalpha.csv **
```

```
##
```

```
## ** Data structure **
```

```
## 'data.frame': 10 obs. of 3 variables:
```

```
## $ subject : int 1 2 3 4 5 6 7 8 9 10
```

```
## $ group : chr "con" "con" "con" "con" ...
```

```
## $ TNFalpha: num 0.34 0.396 0.639 NA NA ...
```

```
##
```

```
## ** Explorative data analysis with graphics**
```

```
## Warning: Removed 2 rows containing non-finite values (`stat_boxplot()`).
```

```
## Warning: Removed 2 rows containing missing values (`geom_point()`).
```

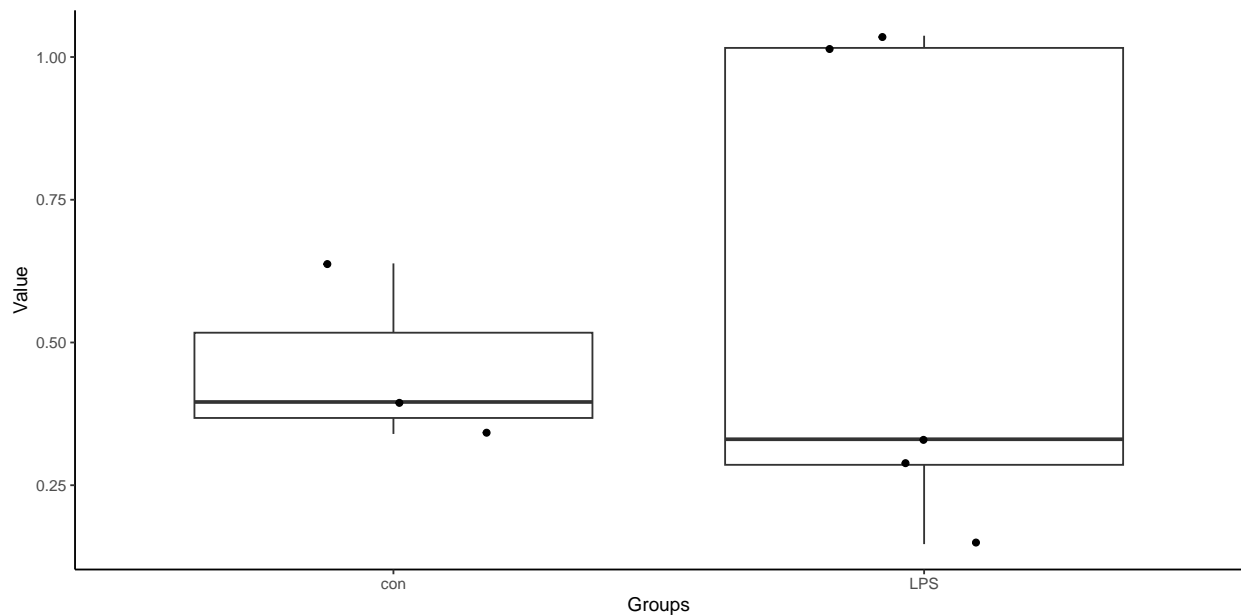

```
## 1. Normality assumption test by Shapiro_Wilk test is
```

```
## p = 0.358
```

```
## Normality assumption was not rejected
```

```
## 2. Equal variance test by Bartlett test is
```

```
## p = 0.203
```

```
## Equal variance assumption was not rejected
```

```
## 3. The result of anova is
```

```
## p = 0.704
```

```
## A statistically significant difference do not exist between groups
```

```
##
```



# Fig2\_G.LPS post6hr\_qPCR\_old\_IL-1beta\_Data analysis

Boohwi Hong

```
## Present data is ** LPS post6hr_qPCR_old_IL-1beta.csv **  
##  
## ** Data structure **  
## 'data.frame': 8 obs. of 3 variables:  
## $ subject : int 1 2 3 4 5 6 7 8  
## $ group : chr "con" "con" "con" "LPS" ...  
## $ IL.1beta: num 0.72 0.799 1.481 2.406 2.138 ...  
##  
## ** Explorative data analysis with graphics**
```

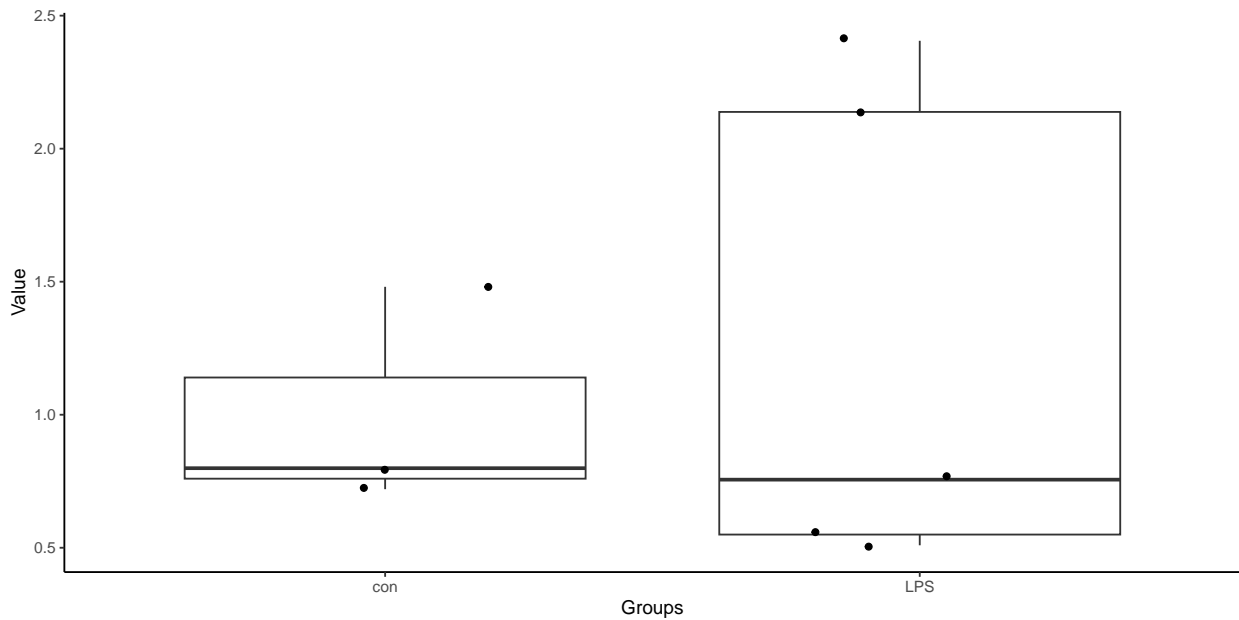

```
## 1. Normality assumption test by Shapiro_Wilk test is  
## p = 0.238  
## Normality assumption was not rejected  
## 2. Equal variance test by Bartlett test is  
## p = 0.293  
## Equal variance assumption was not rejected  
## 3. The result of anova is  
## p = 0.655  
## A statistically significant difference do not exist between groups  
##
```

## Fig2\_G.LPS post6hr\_qPCR\_old\_IL-10\_Data analysis

BooHwi Hong

```
## Present data is ** LPS post6hr_qPCR_old_IL-10.csv **
##
## ** Data structure **
## 'data.frame': 8 obs. of 3 variables:
## $ subject: int 1 2 3 4 5 6 7 8
## $ group : chr "con" "con" "con" "LPS" ...
## $ IL.10 : num 0.661 0.903 1.436 2.873 3.661 ...
##
## ** Explorative data analysis with graphics**
```

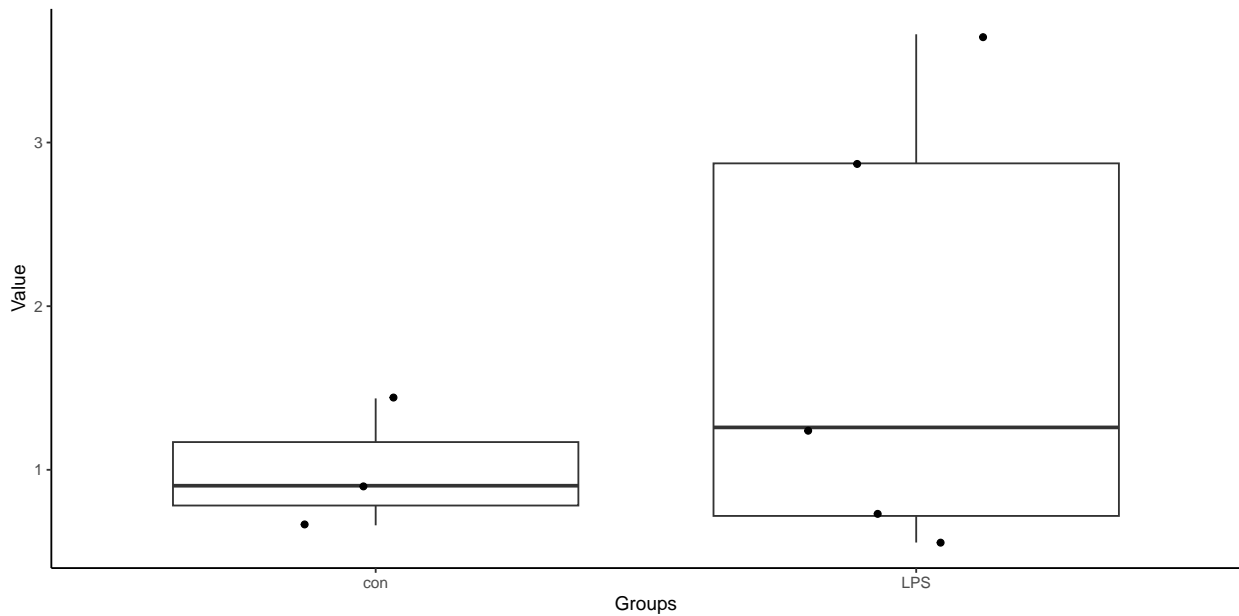

```
## 1. Normality assumption test by Shapiro_Wilk test is
## p = 0.72
## Normality assumption was not rejected
## 2. Equal variance test by Bartlett test is
## p = 0.126
## Equal variance assumption was not rejected
## 3. The result of anova is
## p = 0.370
## A statistically significant difference do not exist between groups
##
```

# Fig2\_G.LPS post6hr\_qPCR\_old\_IL-6\_Data analysis

Boohwi Hong

```
## Present data is ** LPS post6hr_qPCR_old_IL-6.csv **  
##  
## ** Data structure **  
## 'data.frame': 8 obs. of 3 variables:  
## $ subject: int 1 2 3 4 5 6 7 8  
## $ group : chr "con" "con" "con" "LPS" ...  
## $ IL.6 : num 0.531 0.756 1.713 2.474 0.565 ...  
##  
## ** Explorative data analysis with graphics**
```

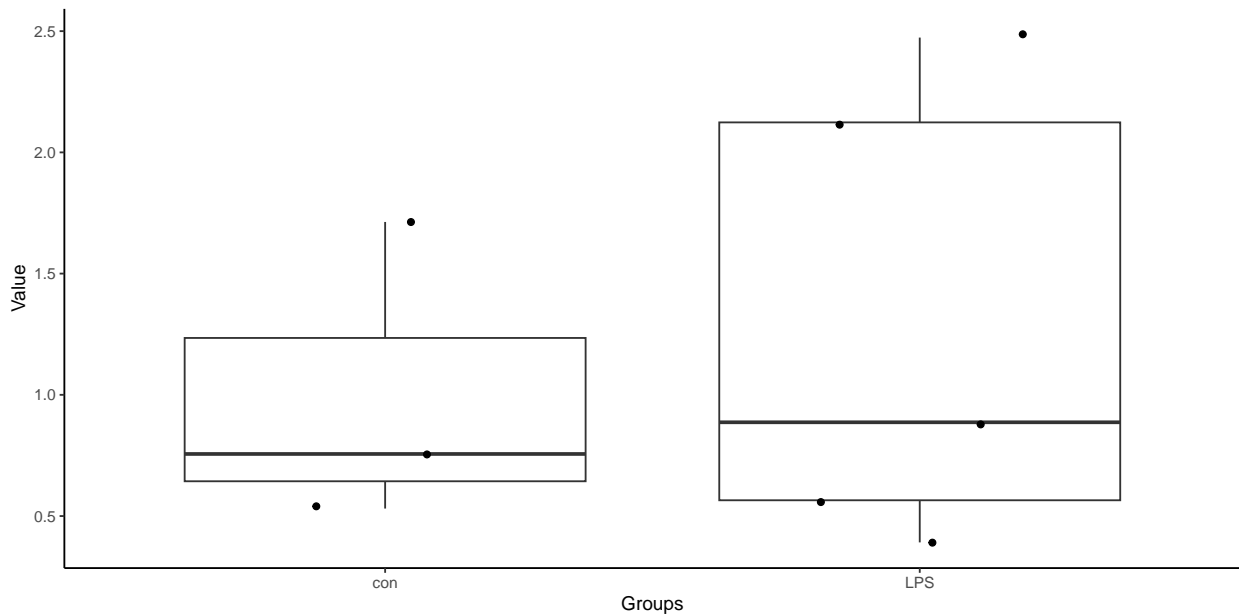

```
## 1. Normality assumption test by Shapiro_Wilk test is  
## p = 0.21  
## Normality assumption was not rejected  
## 2. Equal variance test by Bartlett test is  
## p = 0.560  
## Equal variance assumption was not rejected  
## 3. The result of anova is  
## p = 0.661  
## A statistically significant difference do not exist between groups  
##
```

## Fig2\_H.LPS post24hr\_qPCR\_old\_TNFalpha Data analysis

### Data structure

```
str(d1)
```

```
## 'data.frame':  9 obs. of  3 variables:  
## $ subject : int  1 2 3 4 5 6 7 8 9  
## $ group   : chr  "con" "con" "con" "con" ...  
## $ TNFalpha: num  0.985 0.631 1.074 1.31 1.123 ...
```

### Explorative data analysis with graphics

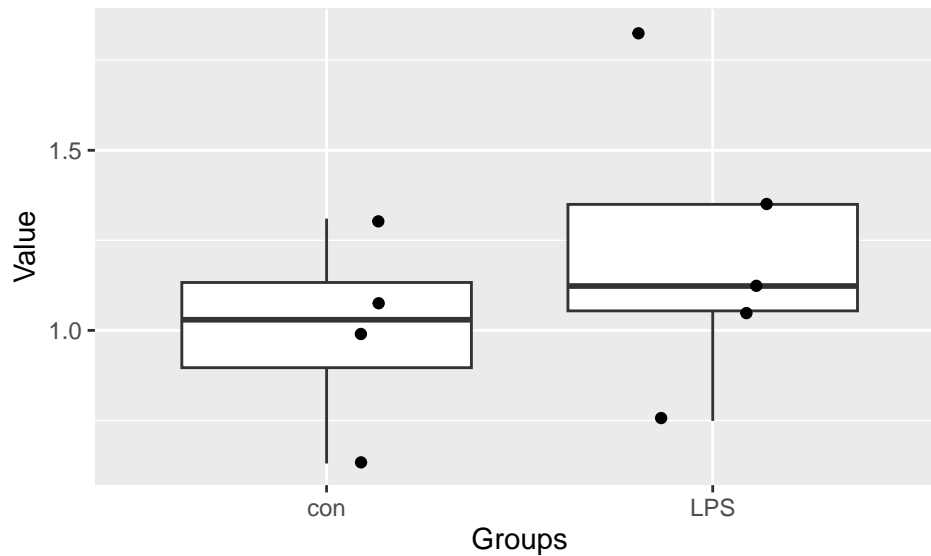

```
##  
## Welch Two Sample t-test  
##  
## data: value by group  
## t = -0.9682, df = 6.9308, p-value = 0.3655  
## alternative hypothesis: true difference in means between group con and group LPS is not equal to 0  
## 95 percent confidence interval:  
## -0.7641655 0.3208164  
## sample estimates:  
## mean in group con mean in group LPS  
## 1.000000 1.221675
```

```
## The result of t-test:  
## p = 0.366  
## A statistically significant difference do not exist between groups
```

# Fig2\_H.LPS post24hr\_qPCR\_old\_IL-1beta Data analysis

## Data structure

```
str(d1)
```

```
## 'data.frame':  9 obs. of  3 variables:  
## $ subject : int  1 2 3 4 5 6 7 8 9  
## $ group   : chr  "con" "con" "con" "con" ...  
## $ IL.1beta: num  0.87 0.609 1.183 1.339 1.13 ...
```

## Explorative data analysis with graphics

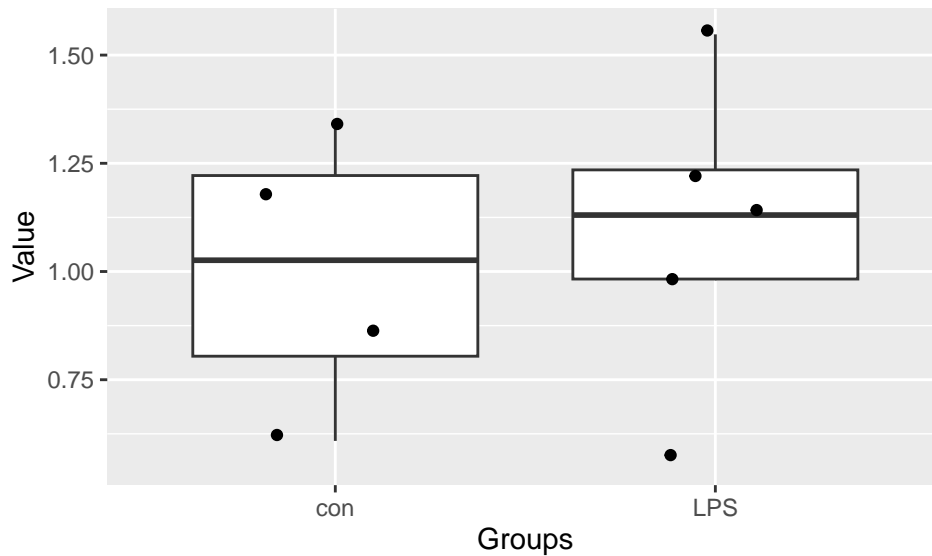

```
##  
## Welch Two Sample t-test  
##  
## data: value by group  
## t = -0.39298, df = 6.8525, p-value = 0.7063  
## alternative hypothesis: true difference in means between group con and group LPS is not equal to 0  
## 95 percent confidence interval:  
## -0.6369758 0.4561058  
## sample estimates:  
## mean in group con mean in group LPS  
## 1.000000 1.090435
```

```
## The result of t-test:  
## p = 0.706  
## A statistically significant difference do not exist between groups
```

## Fig2\_H.LPS post24hr\_qPCR\_old\_IL-10 Data analysis

### Data structure

```
str(d1)
```

```
## 'data.frame':  9 obs. of  3 variables:  
## $ subject: int  1 2 3 4 5 6 7 8 9  
## $ group  : chr  "con" "con" "con" "con" ...  
## $ IL.10  : num  1.044 0.679 1.17 1.107 0.867 ...
```

### Explorative data analysis with graphics

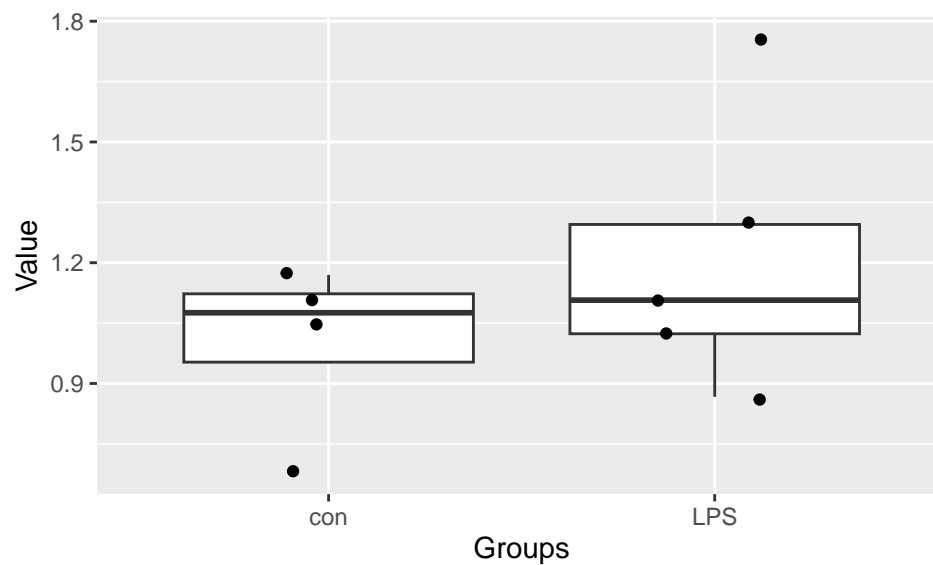

```
##  
## Welch Two Sample t-test  
##  
## data: value by group  
## t = -1.112, df = 6.7904, p-value = 0.304  
## alternative hypothesis: true difference in means between group con and group LPS is not equal to 0  
## 95 percent confidence interval:  
## -0.6574816 0.2386824  
## sample estimates:  
## mean in group con mean in group LPS  
## 1.0000 1.2094
```



```
## The result of t-test:  
## p = 0.304  
## A statistically significant difference do not exist between groups
```

## Fig2\_H.LPS post24hr\_qPCR\_old\_IL-6 Data analysis

### Data structure

```
str(d1)
```

```
## 'data.frame':  9 obs. of  3 variables:  
## $ subject: int  1 2 3 4 5 6 7 8 9  
## $ group  : chr  "con" "con" "con" "con" ...  
## $ IL.6   : num  0.922 0.599 1.263 1.217 1.041 ...
```

### Explorative data analysis with graphics

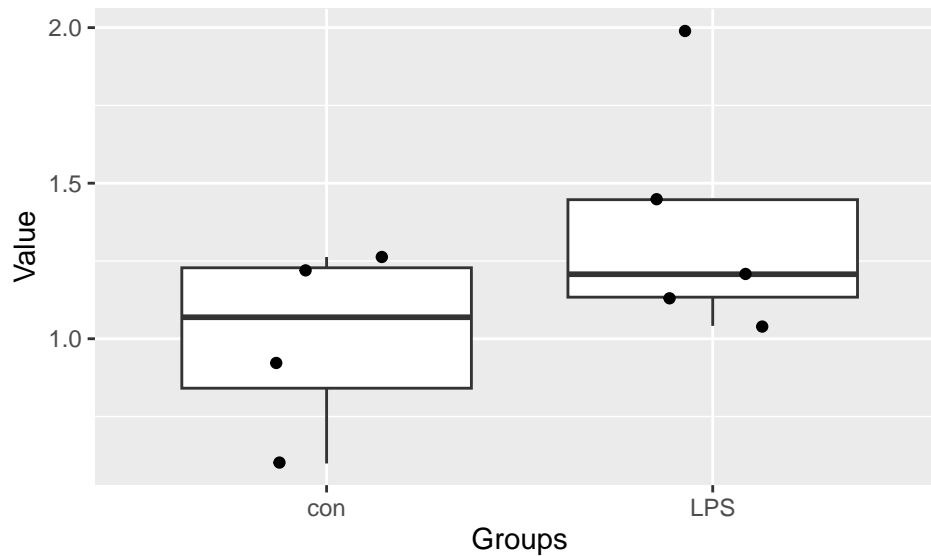

```
##  
## Welch Two Sample t-test  
##  
## data: value by group  
## t = -1.5868, df = 6.9895, p-value = 0.1566  
## alternative hypothesis: true difference in means between group con and group LPS is not equal to 0  
## 95 percent confidence interval:  
## -0.9067129 0.1786021  
## sample estimates:  
## mean in group con mean in group LPS  
## 1.000000 1.364055
```

```
## The result of t-test:  
## p = 0.157  
## A statistically significant difference do not exist between groups
```

## Fig2\_I.LPS post48hr\_qPCR\_old\_TNFalpha Data analysis

### Data structure

```
str(d1)
```

```
## 'data.frame':  10 obs. of  3 variables:  
## $ subject : int  1 2 3 4 5 6 7 8 9 10  
## $ group   : chr  "con" "con" "con" "con" ...  
## $ TNFalpha: num  1.553 0.45 1.025 0.497 1.475 ...
```

### Explorative data analysis with graphics

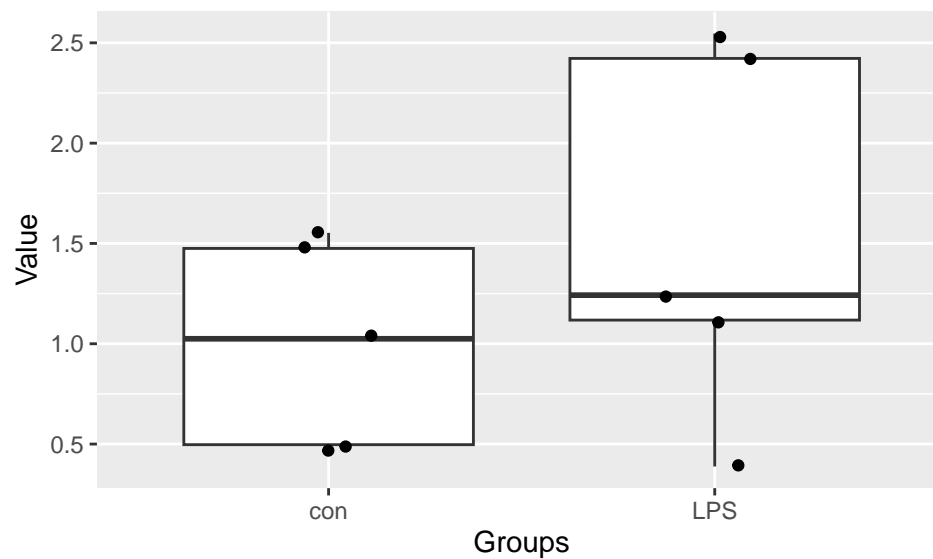

```
##  
## Welch Two Sample t-test  
##  
## data: value by group  
## t = -1.1493, df = 6.3292, p-value = 0.292  
## alternative hypothesis: true difference in means between group con and group LPS is not equal to 0  
## 95 percent confidence interval:  
## -1.6861438 0.5991874  
## sample estimates:  
## mean in group con mean in group LPS  
## 1.000000 1.543478
```

```
## The result of t-test:  
## p = 0.292  
## A statistically significant difference do not exist between groups
```

# Fig2\_I.LPS post48hr\_qPCR\_old\_IL-1beta Data analysis

## Data structure

```
str(d1)
```

```
## 'data.frame':  10 obs. of  3 variables:  
## $ subject : int  1 2 3 4 5 6 7 8 9 10  
## $ group   : chr  "con" "con" "con" "con" ...  
## $ IL.1beta: num  0.882 0.855 1.526 0.776 0.961 ...
```

## Explorative data analysis with graphics

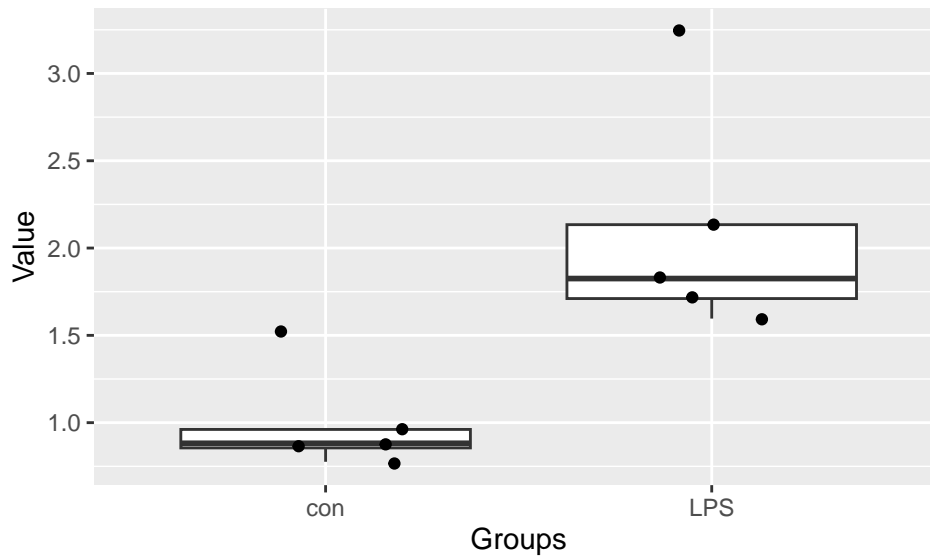

```
##  
## Welch Two Sample t-test  
##  
## data:  value by group  
## t = -3.3676, df = 5.571, p-value = 0.0169  
## alternative hypothesis: true difference in means between group con and group LPS is not equal to 0  
## 95 percent confidence interval:  
## -1.9153551 -0.2857037  
## sample estimates:  
## mean in group con mean in group LPS  
## 0.9999998 2.1005292
```

```
## The result of t-test:  
## p = 0.017  
## A statistically significant difference exist between groups
```

## Fig2\_I.LPS post48hr\_qPCR\_old\_IL-10 Data analysis

### Data structure

```
str(d1)
```

```
## 'data.frame':  10 obs. of  3 variables:  
## $ subject: int  1 2 3 4 5 6 7 8 9 10  
## $ group  : chr  "con" "con" "con" "con" ...  
## $ IL.10  : num  1.157 0.868 1.134 0.926 0.914 ...
```

### Explorative data analysis with graphics

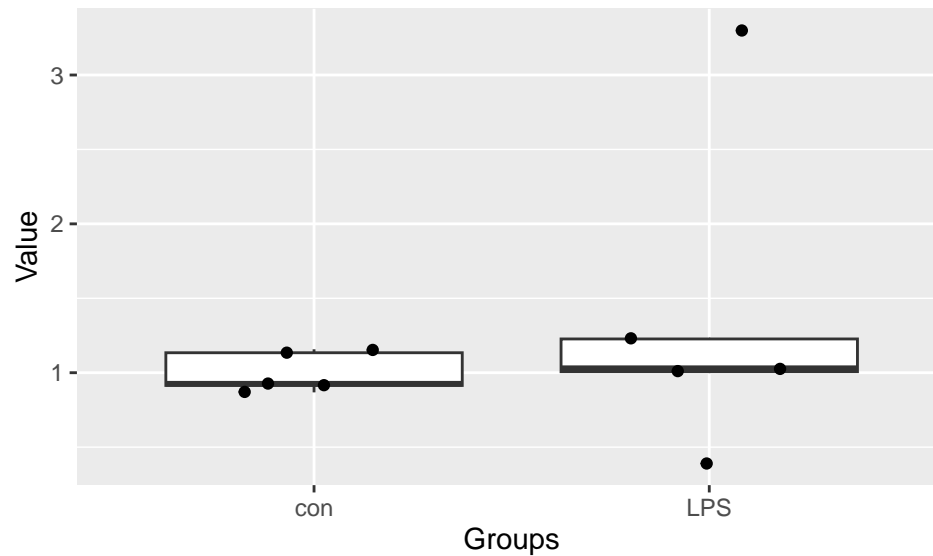

```
##  
## Welch Two Sample t-test  
##  
## data: value by group  
## t = -0.7815, df = 4.1183, p-value = 0.477  
## alternative hypothesis: true difference in means between group con and group LPS is not equal to 0  
## 95 percent confidence interval:  
## -1.7654448 0.9830372  
## sample estimates:  
## mean in group con mean in group LPS  
## 1.000000 1.391204
```



```
## The result of t-test:  
## p = 0.477  
## A statistically significant difference do not exist between groups
```

Fig2\_I.LPS post48hr\_qPCR\_old\_IL-6 Data analysis

## Data structure

```
str(d1)
```

```
## 'data.frame':  9 obs. of  3 variables:  
## $ subject: int  1 2 3 4 5 6 7 8 9  
## $ group  : chr  "con" "con" "con" "con" ...  
## $ IL.6   : num  1.333 0.64 0.947 0.733 1.347 ...
```

## Explorative data analysis with graphics

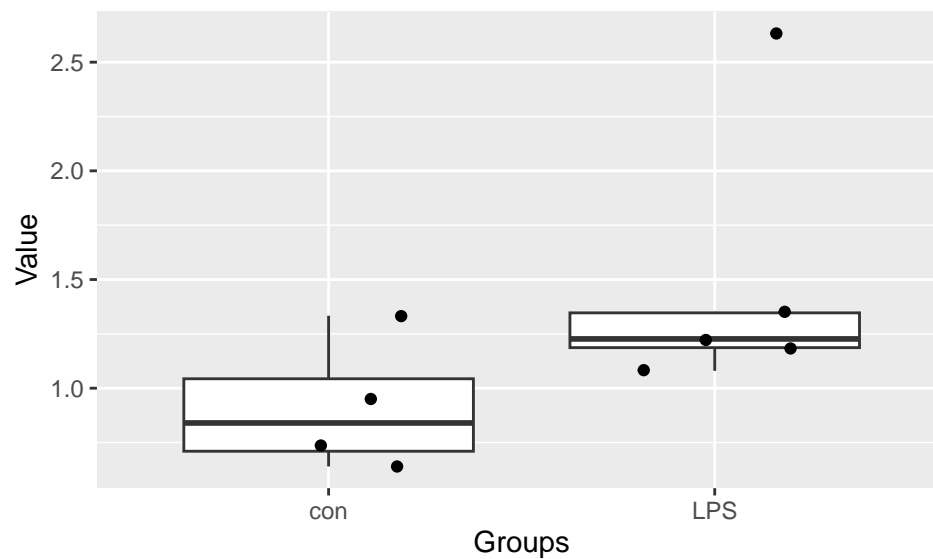

```
##  
## Welch Two Sample t-test  
##  
## data:  value by group  
## t = -1.783, df = 5.9796, p-value = 0.125  
## alternative hypothesis: true difference in means between group con and group LPS is not equal to 0  
## 95 percent confidence interval:  
## -1.3766238  0.2166231  
## sample estimates:  
## mean in group con mean in group LPS  
##      0.9133332      1.4933336
```

```
## The result of t-test:  
## p = 0.125  
## A statistically significant difference do not exist between groups
```

## Fig2\_J.LPS-post48hr\_qPCR\_young\_TNFalpha Data analysis

### Data structure

```
str(d1)
```

```
## 'data.frame':  11 obs. of  3 variables:  
## $ subject : int  1 2 3 4 5 6 7 8 9 10 ...  
## $ group   : chr  "con" "con" "con" "con" ...  
## $ TNFalpha: num  0.935 1.093 1.449 1.019 0.505 ...
```

### Explorative data analysis with graphics

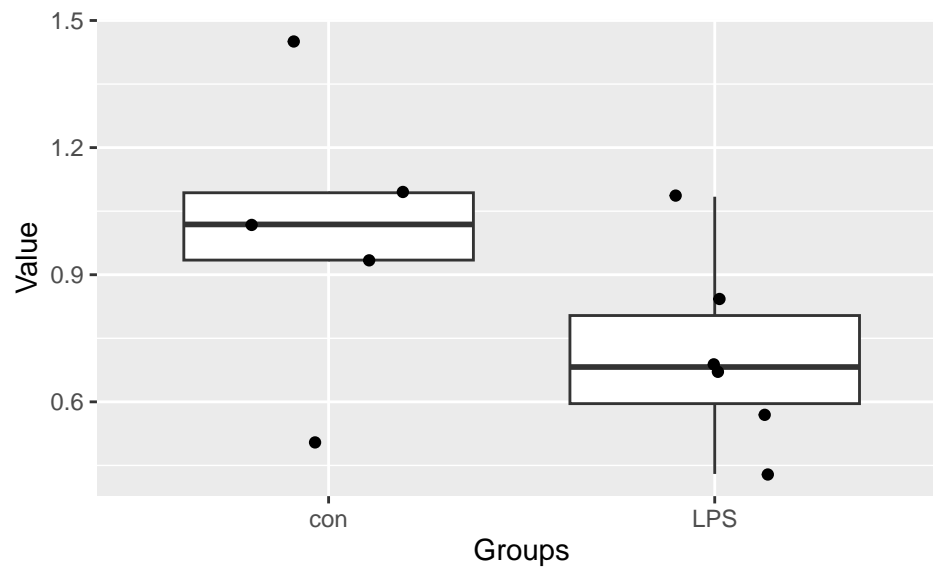

```
##  
## Welch Two Sample t-test  
##  
## data: value by group  
## t = 1.6046, df = 6.7799, p-value = 0.154  
## alternative hypothesis: true difference in means between group con and group LPS is not equal to 0  
## 95 percent confidence interval:  
## -0.1377846 0.7078783  
## sample estimates:  
## mean in group con mean in group LPS  
## 1.0000000 0.7149532
```

```
## The result of t-test:  
## p = 0.154  
## A statistically significant difference do not exist between groups
```

# Fig2\_J.LPS-post48hr\_qPCR\_young\_IL-1beta Data analysis

## Data structure

```
str(d1)
```

```
## 'data.frame':  11 obs. of  3 variables:  
## $ subject : int  1 2 3 4 5 6 7 8 9 10 ...  
## $ group   : chr  "con" "con" "con" "con" ...  
## $ IL.1beta: num  0.809 1.044 1.392 0.833 0.922 ...
```

## Explorative data analysis with graphics

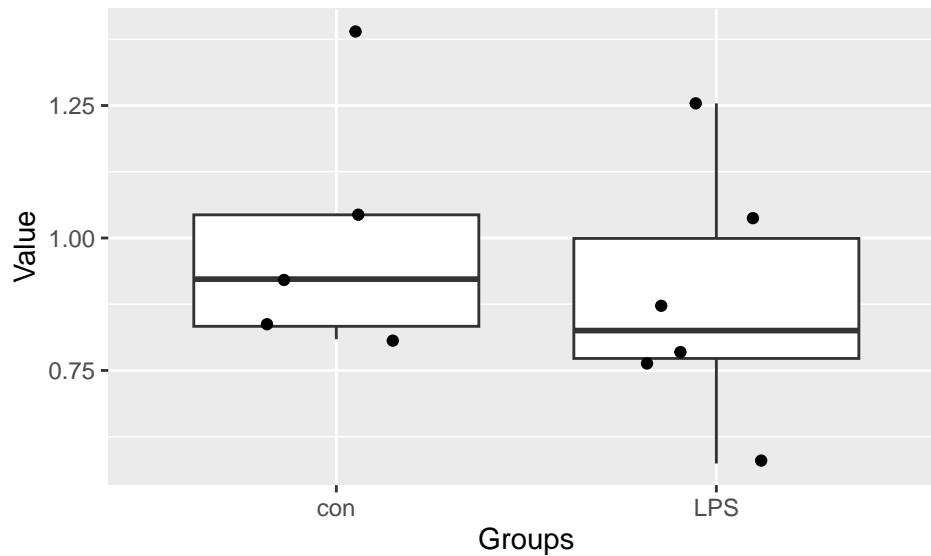

```
##  
## Welch Two Sample t-test  
##  
## data:  value by group  
## t = 0.82167, df = 8.6419, p-value = 0.4333  
## alternative hypothesis: true difference in means between group con and group LPS is not equal to 0  
## 95 percent confidence interval:  
## -0.2091503  0.4453959  
## sample estimates:  
## mean in group con mean in group LPS  
##      0.9999998      0.8818770
```

```
## The result of t-test:  
## p = 0.433  
## A statistically significant difference do not exist between groups
```

## Fig2\_J.LPS-post48hr\_qPCR\_young\_IL-10 Data analysis

### Data structure

```
str(d1)
```

```
## 'data.frame':  11 obs. of  3 variables:  
## $ subject: int  1 2 3 4 5 6 7 8 9 10 ...  
## $ group  : chr  "con" "con" "con" "con" ...  
## $ IL.10  : num  0.754 0.626 1.44 0.762 1.418 ...
```

### Explorative data analysis with graphics

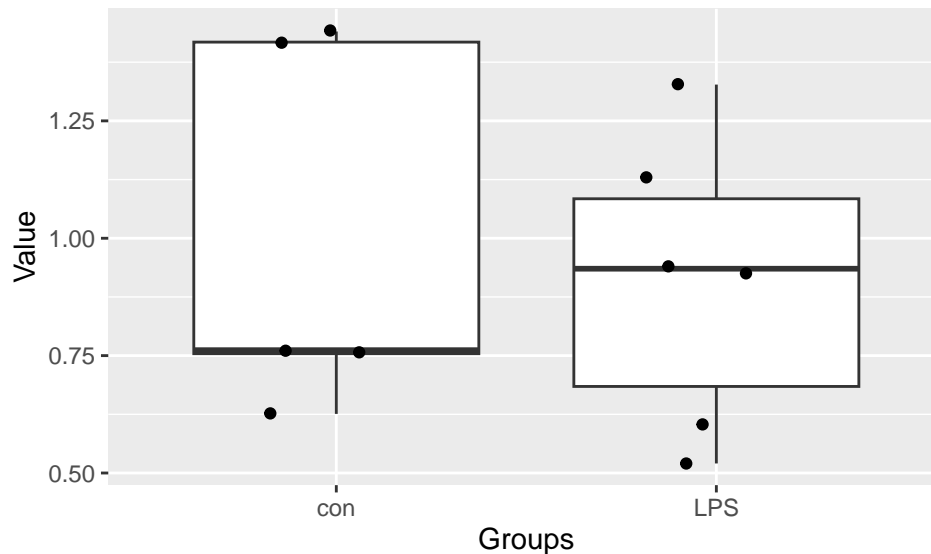

```
##  
## Welch Two Sample t-test  
##  
## data: value by group  
## t = 0.42109, df = 7.5056, p-value = 0.6855  
## alternative hypothesis: true difference in means between group con and group LPS is not equal to 0  
## 95 percent confidence interval:  
## -0.4142599 0.5967636  
## sample estimates:  
## mean in group con mean in group LPS  
## 1.0000000 0.9087482
```



```
## The result of t-test:  
## p = 0.685  
## A statistically significant difference do not exist between groups
```

## Fig2\_J.LPS-post48hr\_qPCR\_young\_IL-6 Data analysis

### Data structure

```
str(d1)
```

```
## 'data.frame':  11 obs. of  3 variables:  
## $ subject: int  1 2 3 4 5 6 7 8 9 10 ...  
## $ group  : chr  "con" "con" "con" "con" ...  
## $ IL.6   : num  0.899 0.656 1.646 0.8 0.998 ...
```

### Explorative data analysis with graphics

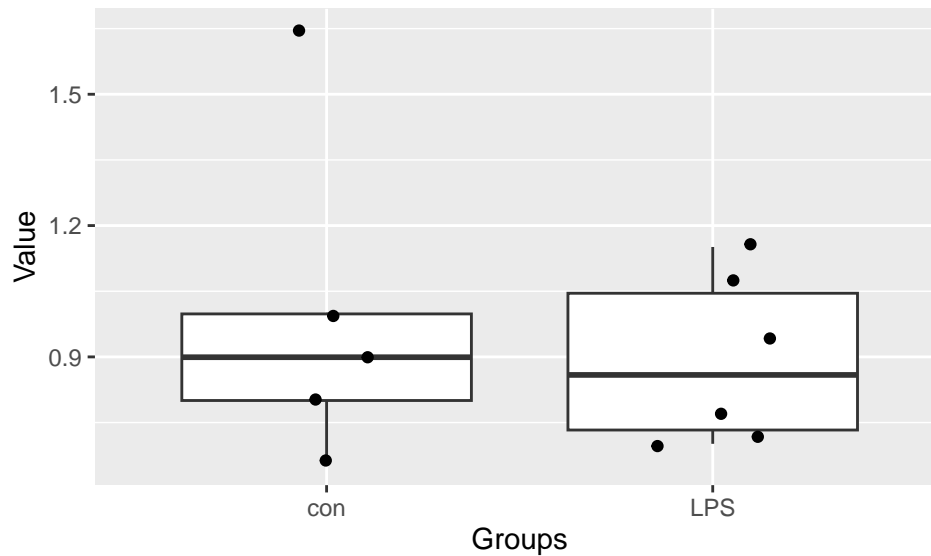

```
##  
## Welch Two Sample t-test  
##  
## data: value by group  
## t = 0.55912, df = 5.6632, p-value = 0.5975  
## alternative hypothesis: true difference in means between group con and group LPS is not equal to 0  
## 95 percent confidence interval:  
## -0.3619690 0.5724007  
## sample estimates:  
## mean in group con mean in group LPS  
## 1.0000000 0.8947842
```

```
## The result of t-test:  
## p = 0.597  
## A statistically significant difference do not exist between groups
```

# Fig2\_K.Western blot\_young\_old\_NLRP3 Data analysis

Boohwi Hong

```
## Present data is ** Western blot_young_old_NLRP3.csv **  
##  
## ** Data structure **  
## 'data.frame': 9 obs. of 3 variables:  
## $ subject: int 1 2 3 4 5 6 7 8 9  
## $ group : chr "young" "young" "young" "young" ...  
## $ NLRP3 : num 0.869 1.247 1.036 0.881 0.966 ...  
##  
## ** Explorative data analysis with graphics**
```

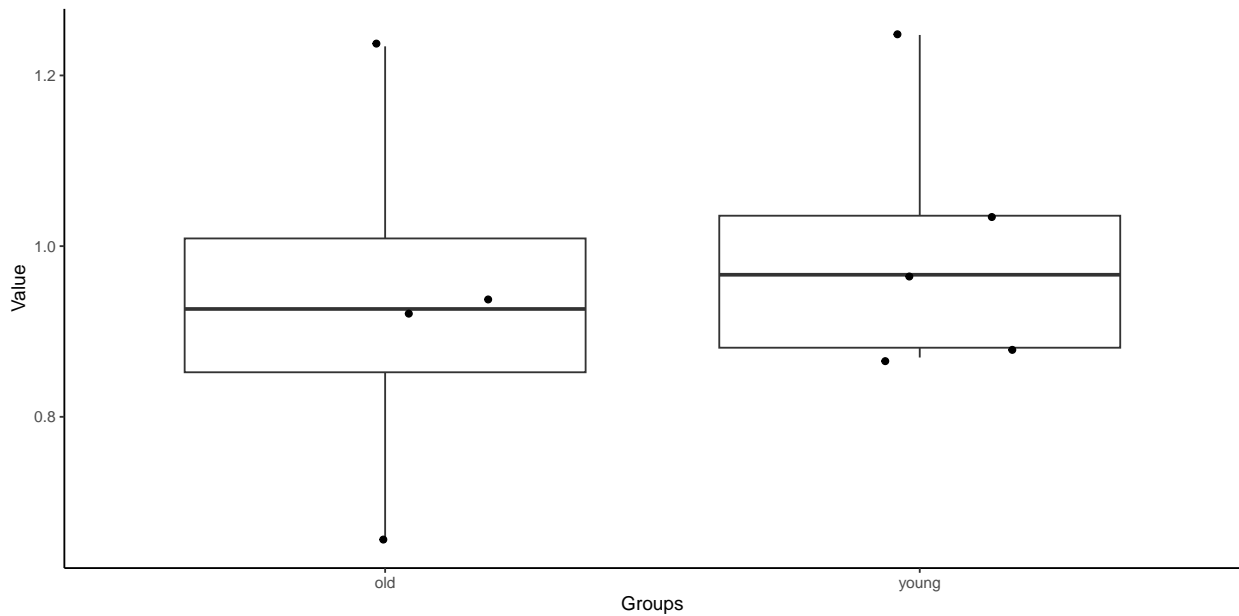

```
## 1. Normality assumption test by Shapiro_Wilk test is  
## p = 0.59  
## Normality assumption was not rejected  
## 2. Equal variance test by Bartlett test is  
## p = 0.450  
## Equal variance assumption was not rejected  
## 3. The result of anova is  
## p = 0.632  
## A statistically significant difference do not exist between groups  
##
```

# Fig2\_K.Western blot\_young\_old\_pro-IL-1beta\_Data analysis

Boohwi Hong

```
## Present data is ** Western blot_young_old_pro-IL-1beta.csv **  
##  
## ** Data structure **  
## 'data.frame': 9 obs. of 3 variables:  
## $ subject : int 1 2 3 4 5 6 7 8 9  
## $ group : chr "young" "young" "young" "young" ...  
## $ pro.IL.1beta: num 1.037 1.103 1.085 1.182 0.593 ...  
##  
## ** Explorative data analysis with graphics**
```

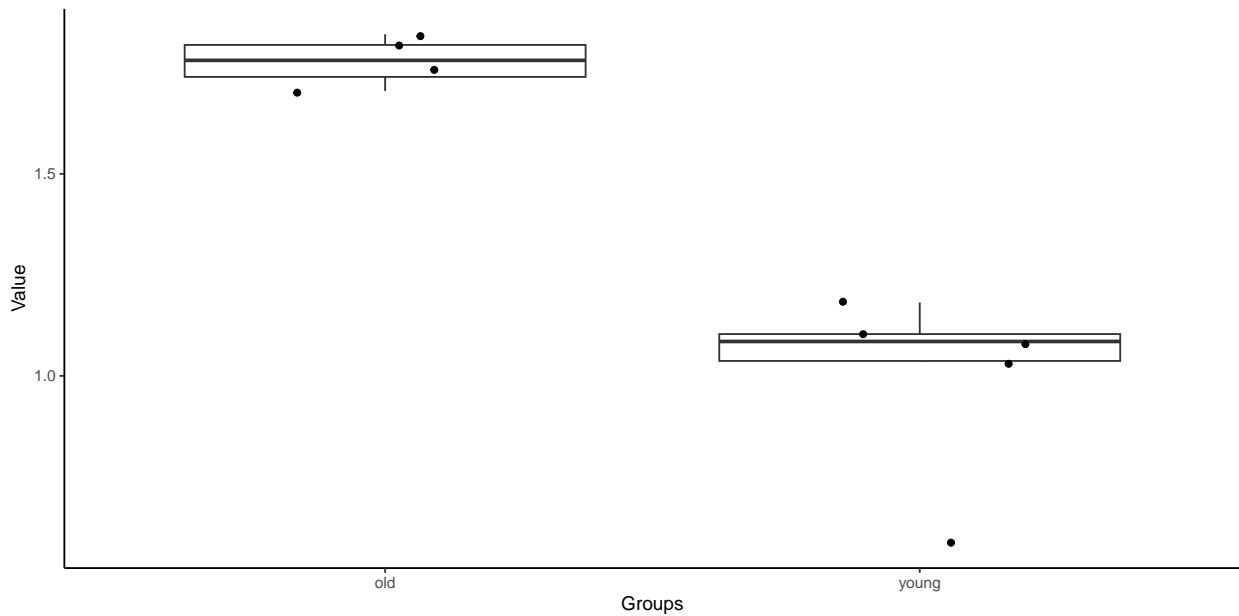

```
## 1. Normality assumption test by Shapiro_Wilk test is  
## p = 0.022  
## Normality assumption was rejected  
## 2. The result of Kruskal_Wallis test:  
## p = 0.014  
## A statistically significant difference exist between groups  
##
```

# Fig2\_K.Western blot\_young\_old\_cleaved-caspase1\_Data analysis

Boohwi Hong

```
## Present data is ** Western blot_young_old_cleaved-caspase1.csv **  
##  
## ** Data structure **  
## 'data.frame': 9 obs. of 3 variables:  
## $ subject : int 1 2 3 4 5 6 7 8 9  
## $ group : chr "young" "young" "young" "young" ...  
## $ cleaved.caspase1: num 0.689 0.969 1.664 0.864 0.813 ...  
##  
## ** Explorative data analysis with graphics**
```

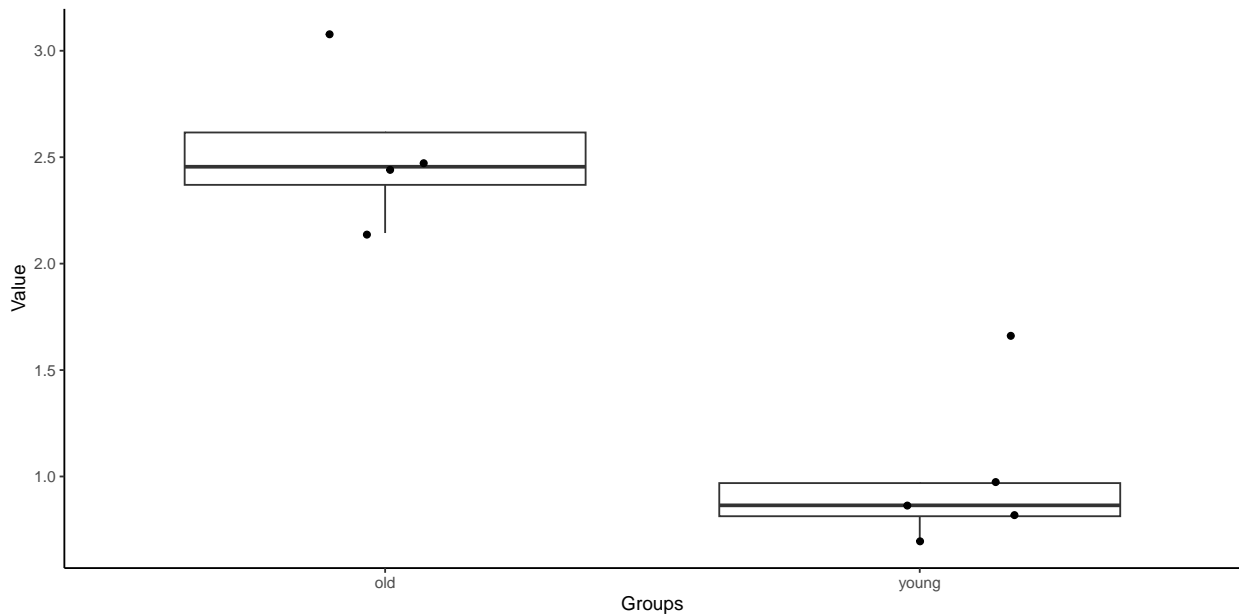

```
## 1. Normality assumption test by Shapiro_Wilk test is  
## p = 0.047  
## Normality assumption was rejected  
## 2. The result of Kruskal_Wallis test:  
## p = 0.014  
## A statistically significant difference exist between groups  
##
```

# **Figure3 Statistics**

# Fig3\_A.Barnes maze\_Primary Latency

## Data analysis using R

Boohwi Hong

### Package install

### Data import

### Data structure

```
str(d1)
```

```
## 'data.frame':  112 obs. of  4 variables:
## $ subject: int  1 2 3 4 5 6 7 8 9 10 ...
## $ group  : chr  "con" "con" "con" "con" ...
## $ trial  : chr  "day1" "day1" "day1" "day1" ...
## $ value  : num  56.6 60.6 40.3 76.9 60.8 ...
```

```
shapiro.test(d1$value)
```

```
##
## Shapiro-Wilk normality test
##
## data:  d1$value
## W = 0.92802, p-value = 1.394e-05
```



## Explorative data analysis with graphics

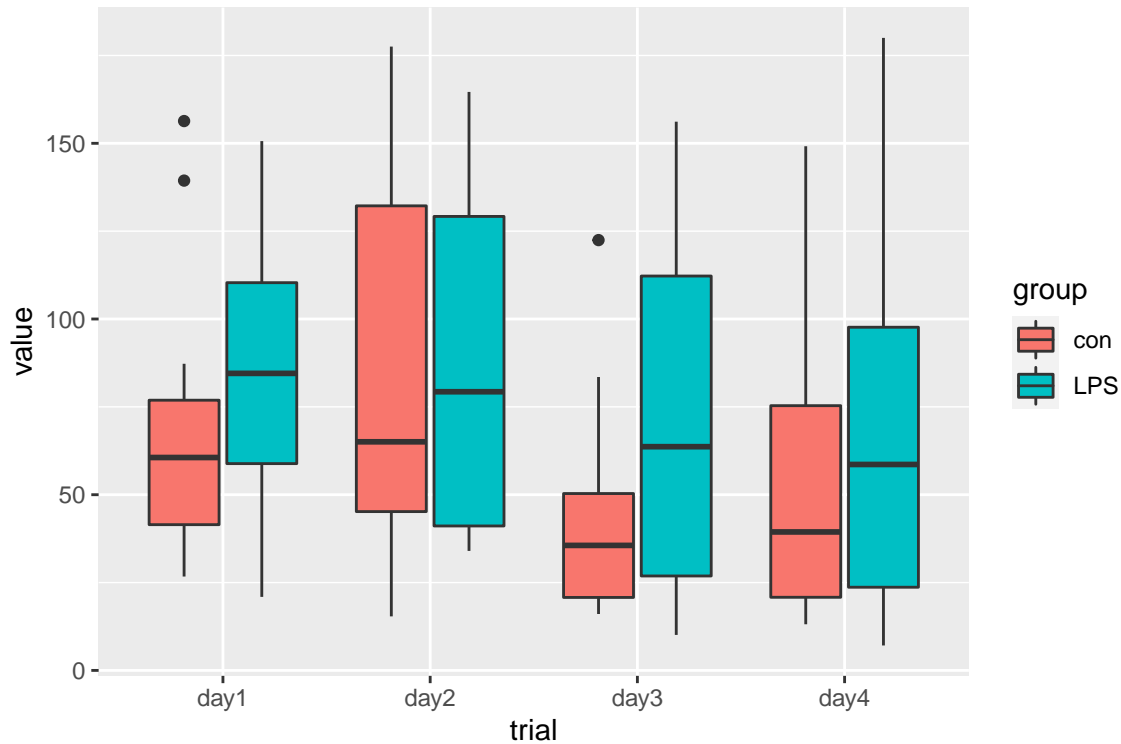

## Model fit

```
## F1 LD F1 Model
## -----
## Check that the order of the time and group levels are correct.
## Time level:  day1 day2 day3 day4
## Group level:  con LPS
## If the order is not correct, specify the correct order in time.order or group.order.

##           Statistic df    p-value
## group      1.575915  1 0.209350065
## trial     11.625510  3 0.008782558
## group:trial 1.411162  3 0.702920459

##           Statistic    df    p-value
## group      1.5759152 1.000000 0.209350065
## trial      4.5316366 2.933837 0.003779748
## group:trial 0.4698419 2.933837 0.699021819

##           Statistic df1    df2    p-value
## group 1.575915    1 25.96745 0.2205297
```

## Interpretation of result

## 1. Difference do not exist between groups

## p = 0.209

## 2. Difference exist between measurement points

## p = 0.004

## 3. Significant interaction do not exist between groups and measurement points

## p = 0.699

# Fig3\_A.Barnes maze\_Primary length

## Data analysis using R

Boohwi Hong

### Package install

### Data import

### Data structure

```
str(d1)
```

```
## 'data.frame':  112 obs. of  4 variables:
## $ subject: int  1 2 3 4 5 6 7 8 9 10 ...
## $ group  : chr  "con" "con" "con" "con" ...
## $ trial  : chr  "day1" "day1" "day1" "day1" ...
## $ value  : num  397 477 356 631 406 ...
```

```
shapiro.test(d1$value)
```

```
##
## Shapiro-Wilk normality test
##
## data:  d1$value
## W = 0.96007, p-value = 0.002021
```

## Explorative data analysis with graphics

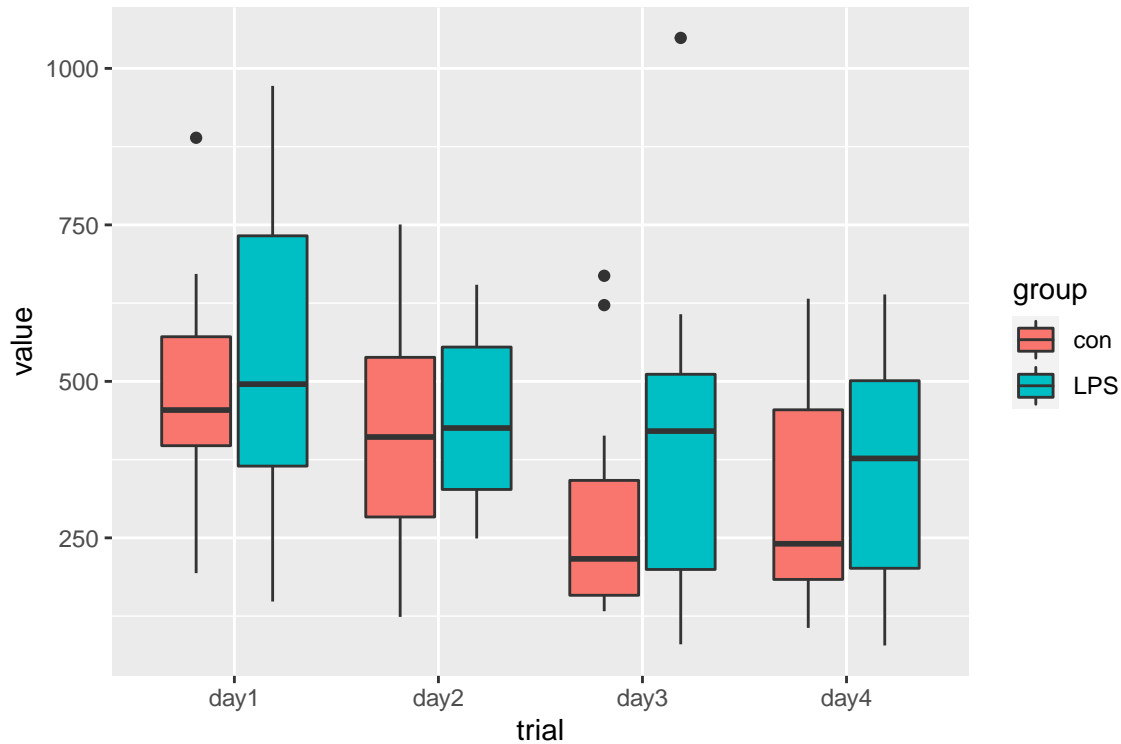

## Model fit

```
## F1 LD F1 Model
## -----
## Check that the order of the time and group levels are correct.
## Time level:  day1 day2 day3 day4
## Group level:  con LPS
## If the order is not correct, specify the correct order in time.order or group.order.

##           Statistic df    p-value
## group      1.8014282  1 0.17953993
## trial     12.8554641  3 0.00495983
## group:trial 0.5542484  3 0.90682148

##           Statistic      df    p-value
## group      1.8014282 1.000000 0.179539925
## trial      5.2206949 2.799798 0.001757758
## group:trial 0.2451294 2.799798 0.851920723

##           Statistic df1      df2 p-value
## group 1.801428  1 25.78564 0.191239
```

## Interpretation of result

## 1. Difference do not exist between groups

## p = 0.180

## 2. Difference exist between measurement points

## p = 0.002

## 3. Significant interaction do not exist between groups and measurement points

## p = 0.852

# Fig3\_A.Barnes maze\_Primary errors

## Data analysis using R

Boohwi Hong

### Package install

### Data import

### Data structure

```
str(d1)
```

```
## 'data.frame':  112 obs. of  4 variables:
## $ subject: int  1 2 3 4 5 6 7 8 9 10 ...
## $ group  : chr  "con" "con" "con" "con" ...
## $ trial  : int  1 1 1 1 1 1 1 1 1 1 ...
## $ value  : num  7.33 11.33 7 6.67 6.67 ...
```

```
shapiro.test(d1$value)
```

```
##
## Shapiro-Wilk normality test
##
## data:  d1$value
## W = 0.95906, p-value = 0.001692
```

## Explorative data analysis with graphics

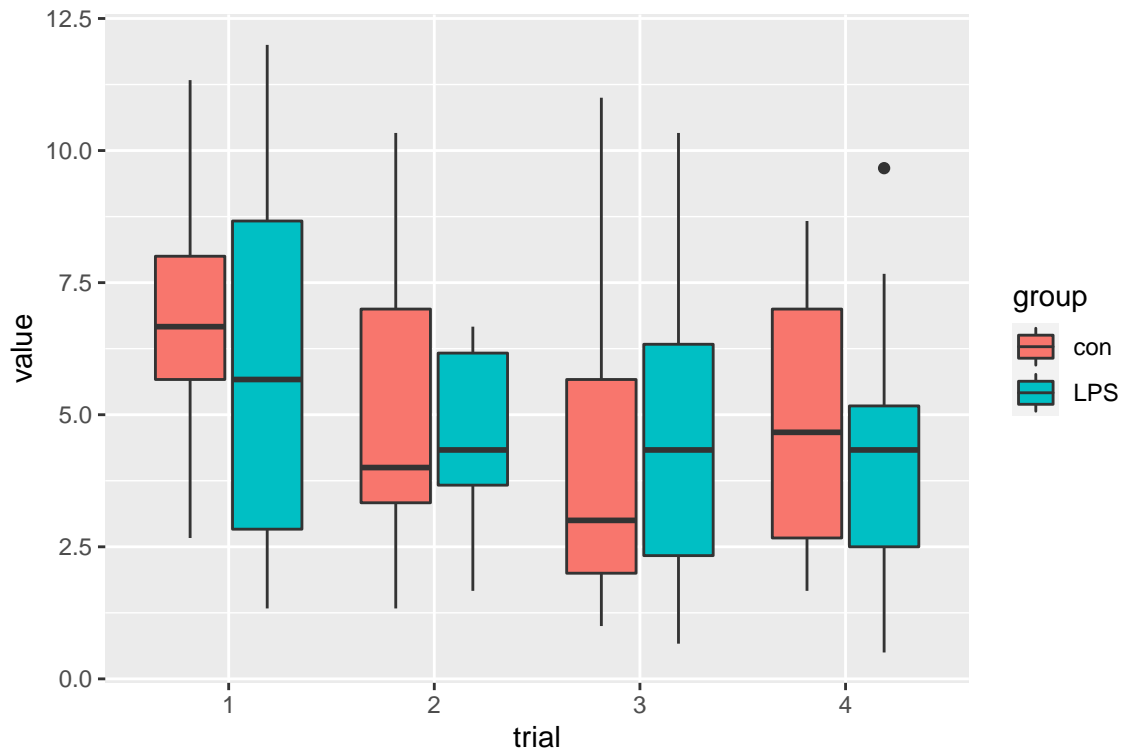

## Model fit

```
## F1 LD F1 Model
## -----
## Check that the order of the time and group levels are correct.
## Time level:  1 2 3 4
## Group level:  con LPS
## If the order is not correct, specify the correct order in time.order or group.order.

##           Statistic df    p-value
## group      0.631484  1 0.42681151
## trial      8.033390  3 0.04532666
## group:trial 1.477013  3 0.68758576

##           Statistic    df    p-value
## group      0.6314840 1.000000 0.42681151
## trial      2.9622190 2.710279 0.03580191
## group:trial 0.5488226 2.710279 0.63095804

##           Statistic df1    df2    p-value
## group 0.631484    1 23.99755 0.4346006
```

## Interpretation of result

## 1. Difference do not exist between groups

## p = 0.427

## 2. Difference exist between measurement points

## p = 0.036

## 3. Significant interaction do not exist between groups and measurement points

## p = 0.631



# Fig3\_C.Barnes maze\_Probe test\_Duration Data analysis

## Data structure

```
str(d1)
```

```
## 'data.frame': 28 obs. of 3 variables:  
## $ subject : int 1 2 3 4 5 6 7 8 9 10 ...  
## $ group : chr "con" "con" "con" "con" ...  
## $ Duration: num 19.8 25 29.5 43.2 28.4 ...
```

## Explorative data analysis with graphics

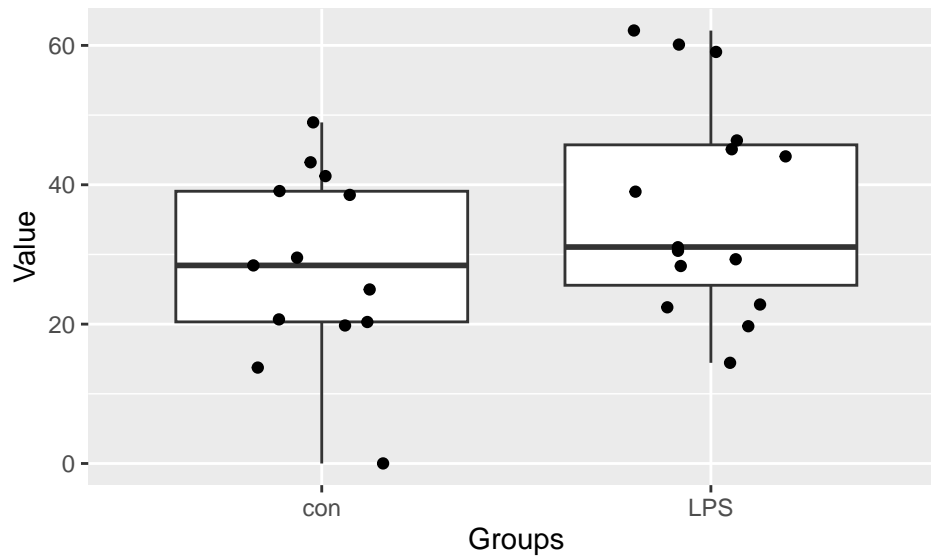

```
##  
## Welch Two Sample t-test  
##  
## data: value by group  
## t = -1.5687, df = 25.964, p-value = 0.1288  
## alternative hypothesis: true difference in means between group con and group LPS is not equal to 0  
## 95 percent confidence interval:  
## -19.896881 2.673506  
## sample estimates:  
## mean in group con mean in group LPS  
## 28.35339 36.96508
```

```
## The result of t-test:  
## p = 0.129  
## A statistically significant difference do not exist between groups
```

# Fig3\_C.Barnes maze\_Probe test\_Distance Data analysis

## Data structure

```
str(d1)
```

```
## 'data.frame': 28 obs. of 3 variables:  
## $ subject : int 1 2 3 4 5 6 7 8 9 10 ...  
## $ group : chr "con" "con" "con" "con" ...  
## $ Distance: num 0.0783 0.2561 0.0864 1.679 1.6421 ...
```

## Explorative data analysis with graphics

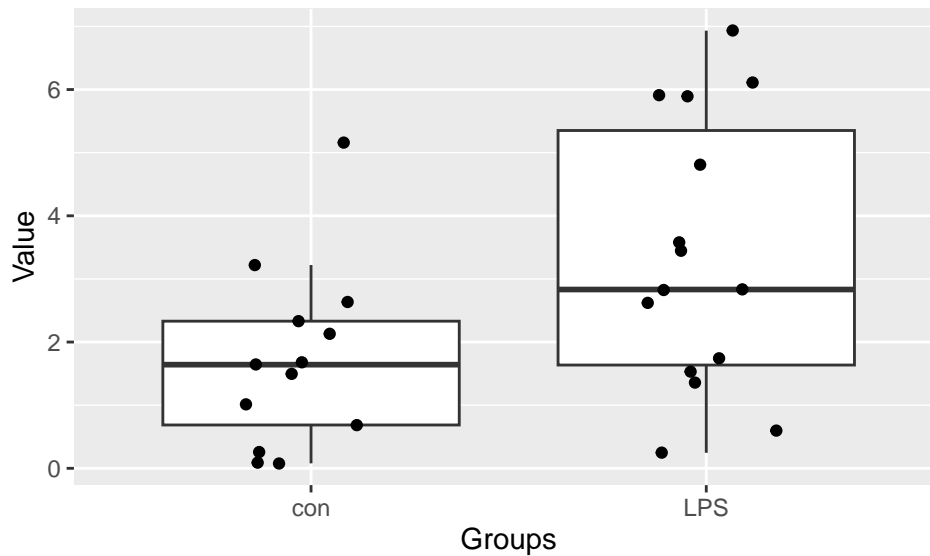

```
##  
## Welch Two Sample t-test  
##  
## data: value by group  
## t = -2.4106, df = 24.581, p-value = 0.02375  
## alternative hypothesis: true difference in means between group con and group LPS is not equal to 0  
## 95 percent confidence interval:  
## -3.0384817 -0.2373261  
## sample estimates:  
## mean in group con mean in group LPS  
## 1.724300 3.362204
```

```
## The result of t-test:  
## p = 0.024  
## A statistically significant difference exist between groups
```

## Fig3\_C.Barnes maze\_Probe test\_Latency Data analysis

### Data structure

```
str(d1)
```

```
## 'data.frame':  28 obs. of  3 variables:  
## $ subject: int  1 2 3 4 5 6 7 8 9 10 ...  
## $ group  : chr  "con" "con" "con" "con" ...  
## $ Latency: num  0.534 2.903 0.5 14.581 15.582 ...
```

### Explorative data analysis with graphics

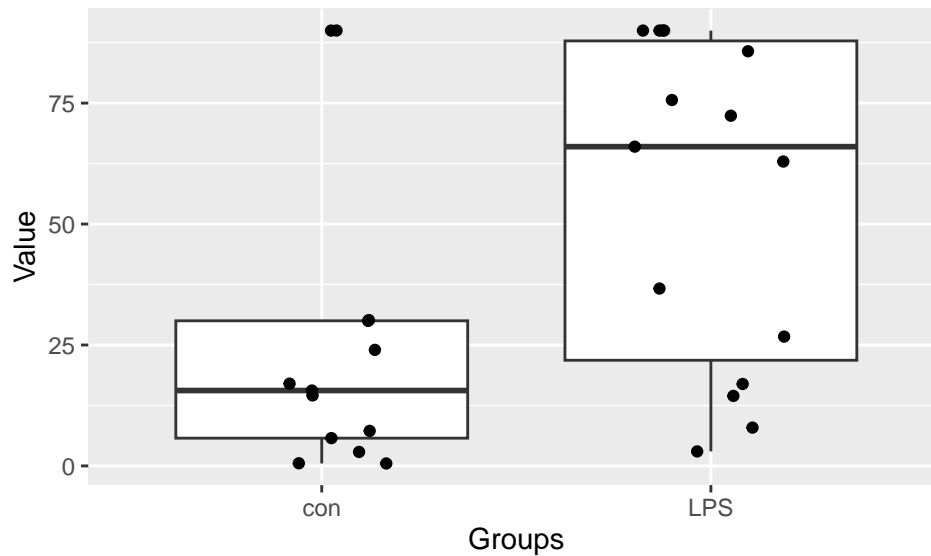

```
##  
## Welch Two Sample t-test  
##  
## data:  value by group  
## t = -2.4719, df = 25.941, p-value = 0.02032  
## alternative hypothesis: true difference in means between group con and group LPS is not equal to 0  
## 95 percent confidence interval:  
## -54.915542 -5.047479  
## sample estimates:  
## mean in group con mean in group LPS  
##          25.24684          55.22835
```

```
## The result of t-test:  
## p = 0.02  
## A statistically significant difference exist between groups
```

## Fig3\_D.Fear chamber test Data analysis

### Data structure

```
str(d1)
```

```
## 'data.frame': 28 obs. of 3 variables:  
## $ subject : int 1 2 3 4 5 6 7 8 9 10 ...  
## $ group : chr "con" "con" "con" "con" ...  
## $ Freezing: num 51.2 40.3 30.9 15.7 45.3 ...
```

### Explorative data analysis with graphics

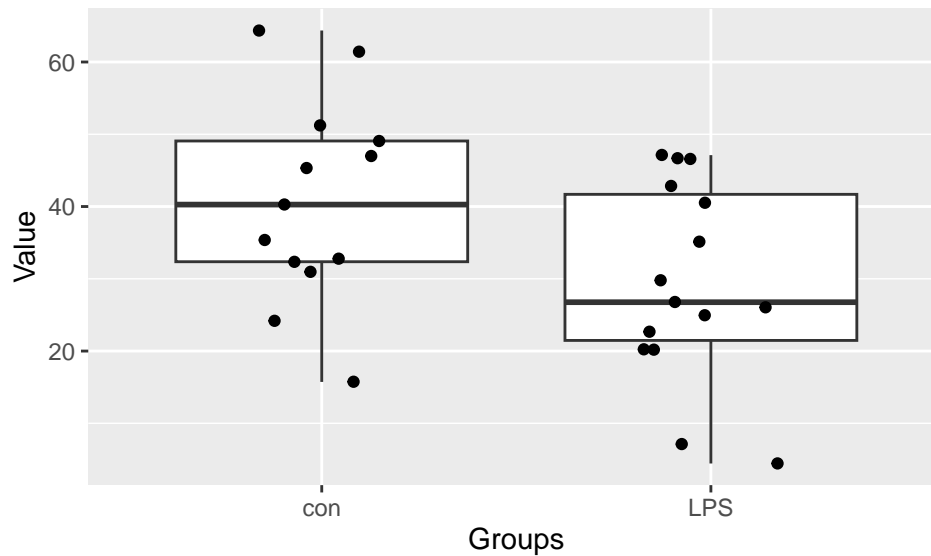

```
##  
## Welch Two Sample t-test  
##  
## data: value by group  
## t = 2.1588, df = 25.191, p-value = 0.04058  
## alternative hypothesis: true difference in means between group con and group LPS is not equal to 0  
## 95 percent confidence interval:  
## 0.5269642 22.2098563  
## sample estimates:  
## mean in group con mean in group LPS  
## 40.77308 29.40467
```

```
## The result of t-test:  
## p = 0.041  
## A statistically significant difference exist between groups
```



# Figure4 Statistics

## Fig4\_B.young mice\_rotenone\_OCR\_Basal Data analysis

### Data structure

```
str(d1)
```

```
## 'data.frame':  19 obs. of  3 variables:  
## $ subject: int  1 2 3 4 5 6 7 8 9 10 ...  
## $ group  : chr  "con" "con" "con" "con" ...  
## $ OCR    : num  294 211 290 300 325 ...
```

### Explorative data analysis with graphics

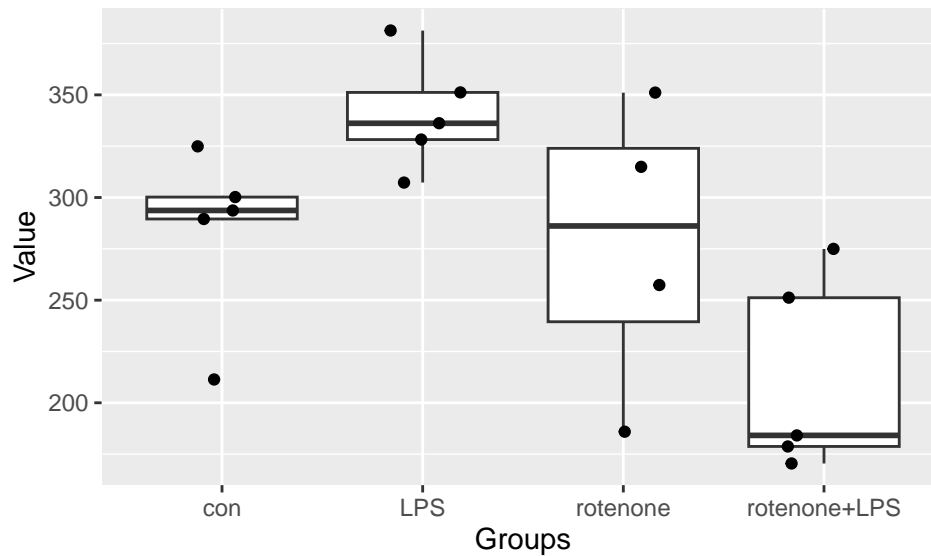

```
##           Df Sum Sq Mean Sq F value Pr(>F)  
## d1[, 2]    3  41770   13923   5.949  0.007 **  
## Residuals 15  35104    2340  
## ---  
## Signif. codes:  0 '***' 0.001 '**' 0.01 '*' 0.05 '.' 0.1 ' ' 1  
  
## The result of anova is  
## p = 0.007  
## A statistically significant difference exist between groups
```

```

## Tukey multiple comparisons of means
## 95% family-wise confidence level
##
## Fit: aov(formula = d1[, 3] ~ d1[, 2], data = d1)
##
## $'d1[, 2]'
##           diff           lwr           upr           p adj
## LPS-con      56.892983  -31.28921  145.07518  0.2857524
## rotenone-con  -6.638199 -100.16954   86.89314  0.9968350
## rotenone+LPS-con -72.057223 -160.23942   16.12497  0.1294538
## rotenone-LPS  -63.531182 -157.06253   30.00016  0.2468473
## rotenone+LPS-LPS -128.950206 -217.13240  -40.76801  0.0037309
## rotenone+LPS-rotenone -65.419024 -158.95037   28.11232  0.2257379

```

## Fig4\_B.young mice\_rotenone\_OCR\_State3 Data analysis

### Data structure

```
str(d1)
```

```
## 'data.frame':  19 obs. of  3 variables:  
## $ subject: int  1 2 3 4 5 6 7 8 9 10 ...  
## $ group  : chr  "con" "con" "con" "con" ...  
## $ OCR    : num  1238 902 1228 1211 1048 ...
```

### Explorative data analysis with graphics

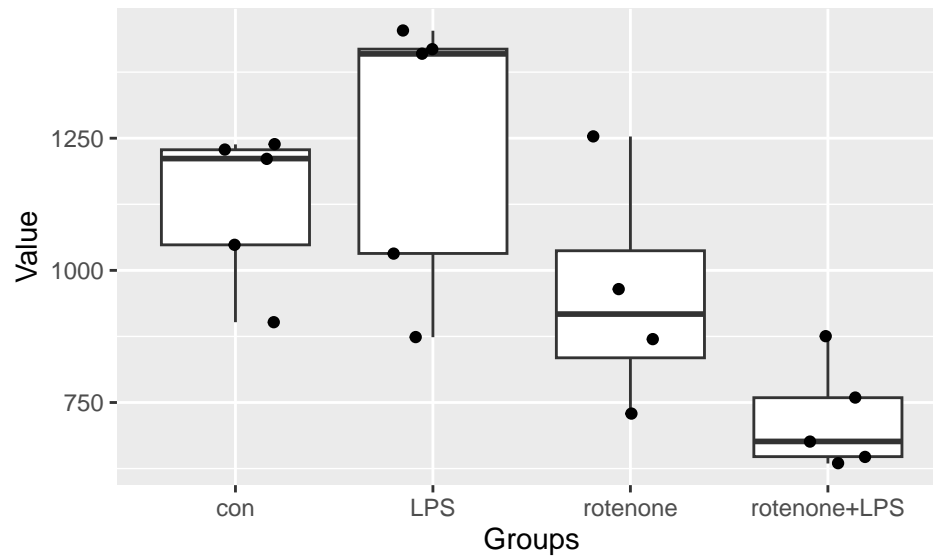

```
##           Df Sum Sq Mean Sq F value Pr(>F)  
## d1[, 2]    3 762191 254064  6.834 0.00401 **  
## Residuals 15 557642  37176  
## ---  
## Signif. codes:  0 '***' 0.001 '**' 0.01 '*' 0.05 '.' 0.1 ' ' 1  
  
## The result of anova is  
## p = 0.004  
## A statistically significant difference exist between groups
```

```

## Tukey multiple comparisons of means
## 95% family-wise confidence level
##
## Fit: aov(formula = d1[, 3] ~ d1[, 2], data = d1)
##
## $'d1[, 2]'
##
##           diff           lwr           upr           p adj
## LPS-con          111.7427 -239.7194  463.20489 0.7965979
## rotenone-con     -171.3073 -544.0892  201.47461 0.5623868
## rotenone+LPS-con -407.0108 -758.4730  -55.54867 0.0208876
## rotenone-LPS     -283.0500 -655.8320   89.73189 0.1713149
## rotenone+LPS-LPS -518.7536 -870.2157 -167.29140 0.0034534
## rotenone+LPS-rotenone -235.7035 -608.4854  137.07839 0.3015474

```

## Fig4\_B.young mice\_rotenone\_OCR\_State4o Data analysis

### Data structure

```
str(d1)
```

```
## 'data.frame':  19 obs. of  3 variables:  
## $ subject: int  1 2 3 4 5 6 7 8 9 10 ...  
## $ group  : chr  "con" "con" "con" "con" ...  
## $ OCR    : num  233 145 208 202 208 ...
```

### Explorative data analysis with graphics

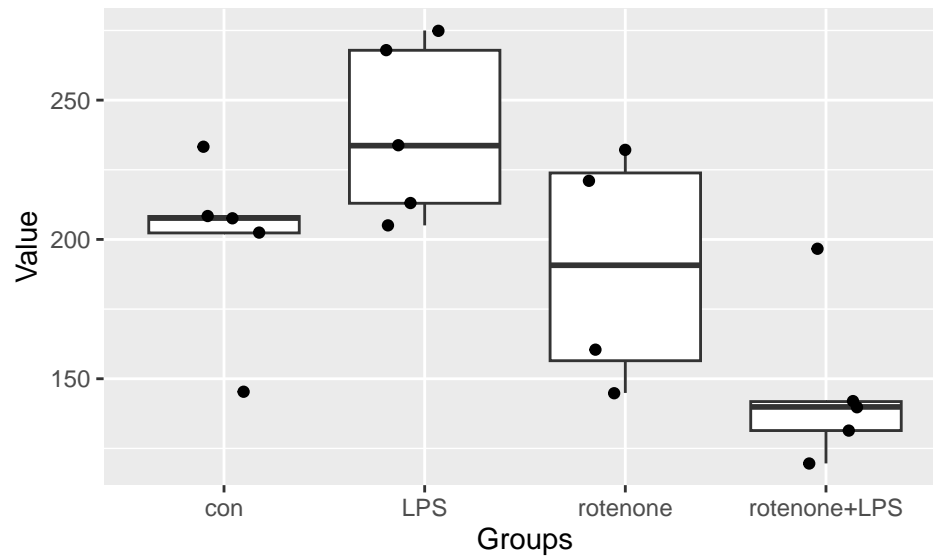

```
##           Df Sum Sq Mean Sq F value Pr(>F)  
## d1[, 2]    3  21878    7293    6.29 0.00562 **  
## Residuals 15  17390    1159  
## ---  
## Signif. codes:  0 '***' 0.001 '**' 0.01 '*' 0.05 '.' 0.1 ' ' 1  
  
## The result of anova is  
## p = 0.006  
## A statistically significant difference exist between groups
```

```

## Tukey multiple comparisons of means
## 95% family-wise confidence level
##
## Fit: aov(formula = d1[, 3] ~ d1[, 2], data = d1)
##
## $'d1[, 2]'
```

|                          | diff       | lwr        | upr        | p adj     |
|--------------------------|------------|------------|------------|-----------|
| ## LPS-con               | 39.557092  | -22.50877  | 101.622952 | 0.2952808 |
| ## rotenone-con          | -9.758186  | -75.58897  | 56.072601  | 0.9729040 |
| ## rotenone+LPS-con      | -53.467196 | -115.53306 | 8.598665   | 0.1036416 |
| ## rotenone-LPS          | -49.315278 | -115.14606 | 16.515509  | 0.1797274 |
| ## rotenone+LPS-LPS      | -93.024288 | -155.09015 | -30.958427 | 0.0030361 |
| ## rotenone+LPS-rotenone | -43.709010 | -109.53980 | 22.121777  | 0.2637949 |

## Fig4\_B.young mice\_rotenone\_OCR\_State3u Data analysis

### Data structure

```
str(d1)
```

```
## 'data.frame':  19 obs. of  3 variables:  
## $ subject: int  1 2 3 4 5 6 7 8 9 10 ...  
## $ group  : chr  "con" "con" "con" "con" ...  
## $ OCR    : int  1210 737 1010 1054 952 1121 1307 1228 1212 952 ...
```

### Explorative data analysis with graphics

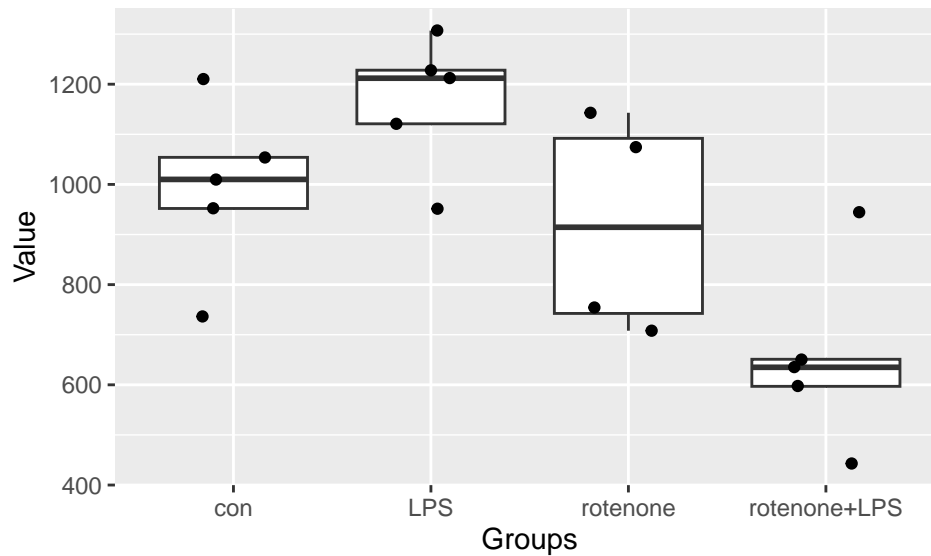

```
##           Df Sum Sq Mean Sq F value Pr(>F)  
## d1[, 2]    3 673886  224629   7.153 0.00331 **  
## Residuals 15 471032   31402  
## ---  
## Signif. codes:  0 '***' 0.001 '**' 0.01 '*' 0.05 '.' 0.1 ' ' 1  
  
## The result of anova is  
## p = 0.003  
## A statistically significant difference exist between groups
```



```

## Tukey multiple comparisons of means
## 95% family-wise confidence level
##
## Fit: aov(formula = d1[, 3] ~ d1[, 2], data = d1)
##
## $'d1[, 2]'
##           diff      lwr      upr      p adj
## LPS-con      171.4 -151.6174  494.41742 0.4455817
## rotenone-con  -72.6 -415.2117  270.01172 0.9270814
## rotenone+LPS-con -338.4 -661.4174  -15.38258 0.0385709
## rotenone-LPS  -244.0 -586.6117   98.61172 0.2131421
## rotenone+LPS-LPS -509.8 -832.8174 -186.78258 0.0019426
## rotenone+LPS-rotenone -265.8 -608.4117   76.81172 0.1583467

```

## Fig4\_C.young mice\_rotenone\_RCR Data analysis

### Data structure

```
str(d1)
```

```
## 'data.frame':  19 obs. of  3 variables:  
## $ subject: int  1 2 3 4 5 6 7 8 9 10 ...  
## $ group  : chr  "con" "con" "con" "con" ...  
## $ RCR    : num  4.22 3.51 3.69 3.95 3.06 ...
```

### Explorative data analysis with graphics

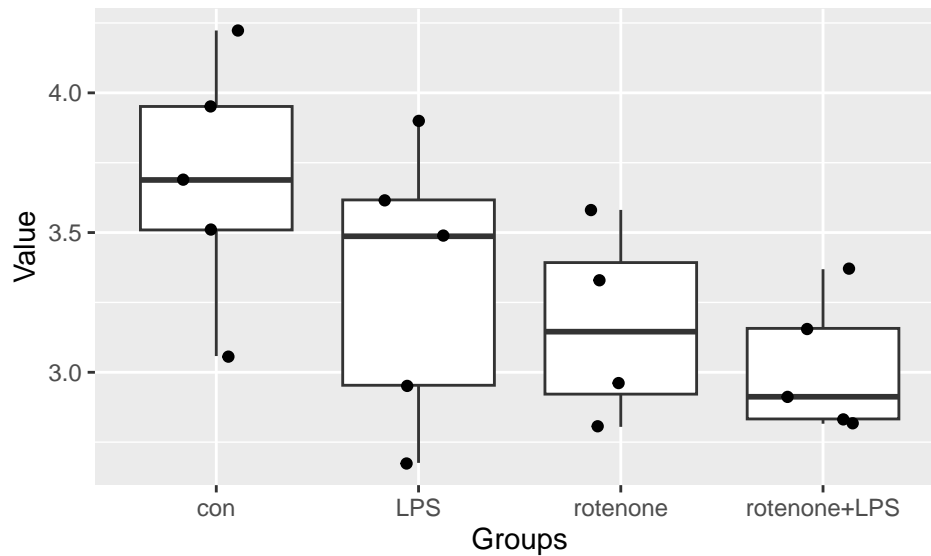

```
##           Df Sum Sq Mean Sq F value Pr(>F)  
## d1[, 2]    3  1.216  0.4052   2.547 0.095 .  
## Residuals 15  2.386  0.1591  
## ---  
## Signif. codes:  0 '***' 0.001 '**' 0.01 '*' 0.05 '.' 0.1 ' ' 1
```

```
## The result of anova is  
## p = 0.0950  
## A statistically significant difference do not exist between groups
```

## Fig4\_C.young mice\_rotenone\_RCRu Data analysis

### Data structure

```
str(d1)
```

```
## 'data.frame':  19 obs. of  3 variables:  
## $ subject: int  1 2 3 4 5 6 7 8 9 10 ...  
## $ group  : chr  "con" "con" "con" "con" ...  
## $ RCRu   : num  3.88 2.45 2.66 3.08 2.33 ...
```

### Explorative data analysis with graphics

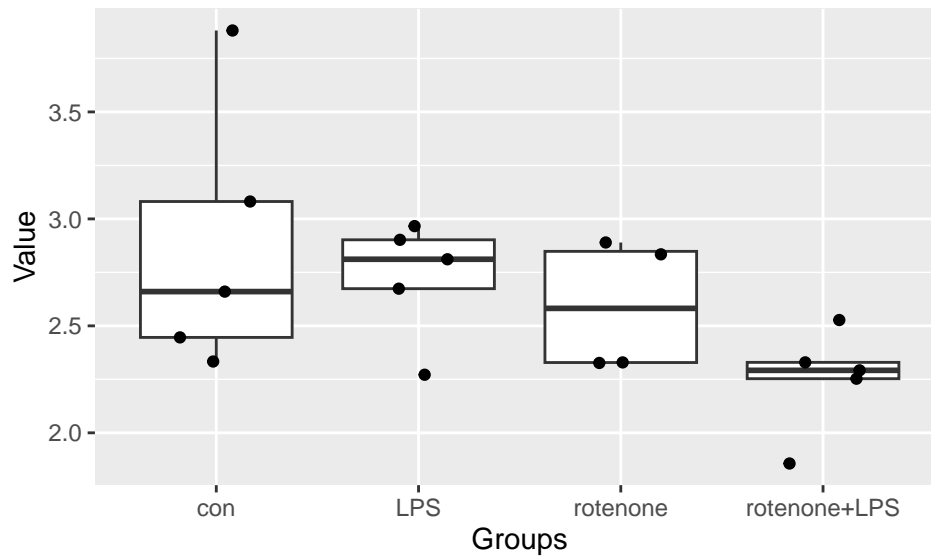

```
##           Df Sum Sq Mean Sq F value Pr(>F)  
## d1[, 2]    3  1.074  0.3581   2.229  0.127  
## Residuals 15  2.409  0.1606
```

```
## The result of anova is
```

```
## p = 0.1269
```

```
## A statistically significant difference do not exist between groups
```

## Fig4\_D.young mice\_rotenone\_qPCR\_TNFalpha Data analysis

### Data structure

```
str(d1)
```

```
## 'data.frame': 19 obs. of 3 variables:  
## $ subject : int 1 2 3 4 5 6 7 8 9 10 ...  
## $ group : chr "con" "con" "con" "con" ...  
## $ TNFalpha: num 0.89 1.22 0.8 1.01 1.07 ...
```

### Explorative data analysis with graphics

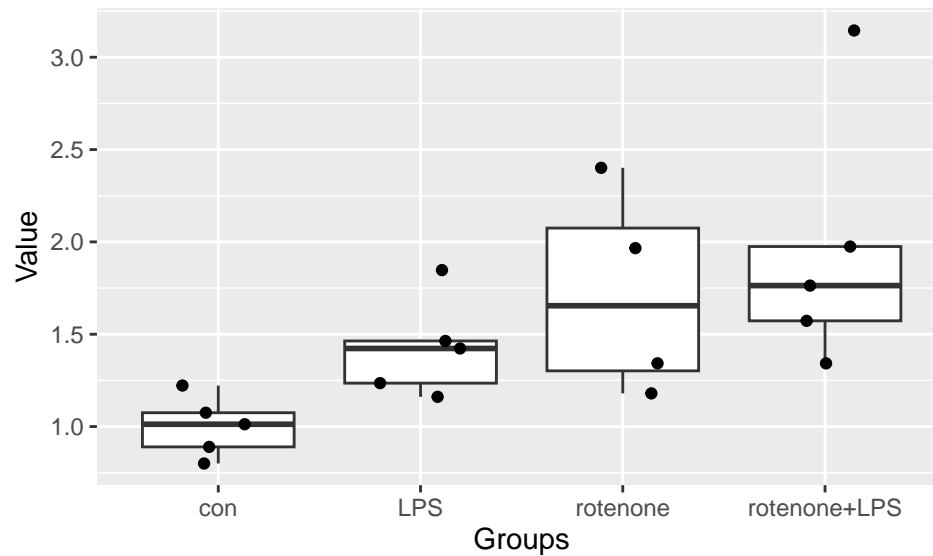

```
##           Df Sum Sq Mean Sq F value Pr(>F)  
## d1[, 2]    3  2.526  0.8419   3.797 0.033 *  
## Residuals 15  3.326  0.2217  
## ---  
## Signif. codes:  0 '***' 0.001 '**' 0.01 '*' 0.05 '.' 0.1 ' ' 1  
  
## The result of anova is  
## p = 0.033  
## A statistically significant difference exist between groups
```

```

## Tukey multiple comparisons of means
## 95% family-wise confidence level
##
## Fit: aov(formula = d1[, 3] ~ d1[, 2], data = d1)
##
## $'d1[, 2]'
```

|                          | diff      | lwr        | upr      | p adj     |
|--------------------------|-----------|------------|----------|-----------|
| ## LPS-con               | 0.4260386 | -0.4322830 | 1.284360 | 0.5007225 |
| ## rotenone-con          | 0.7223600 | -0.1880275 | 1.632748 | 0.1453972 |
| ## rotenone+LPS-con      | 0.9595036 | 0.1011820  | 1.817825 | 0.0261478 |
| ## rotenone-LPS          | 0.2963214 | -0.6140661 | 1.206709 | 0.7852047 |
| ## rotenone+LPS-LPS      | 0.5334650 | -0.3248566 | 1.391787 | 0.3151799 |
| ## rotenone+LPS-rotenone | 0.2371436 | -0.6732439 | 1.147531 | 0.8749356 |

## Fig4\_D.young mice\_rotenone\_qPCR\_IL-1beta Data analysis

### Data structure

```
str(d1)
```

```
## 'data.frame':  19 obs. of  3 variables:
## $ subject : int  1 2 3 4 5 6 7 8 9 10 ...
## $ group   : chr  "con" "con" "con" "con" ...
## $ IL.1beta: num  0.778 1.042 1.104 1.33 0.747 ...
```

### Explorative data analysis with graphics

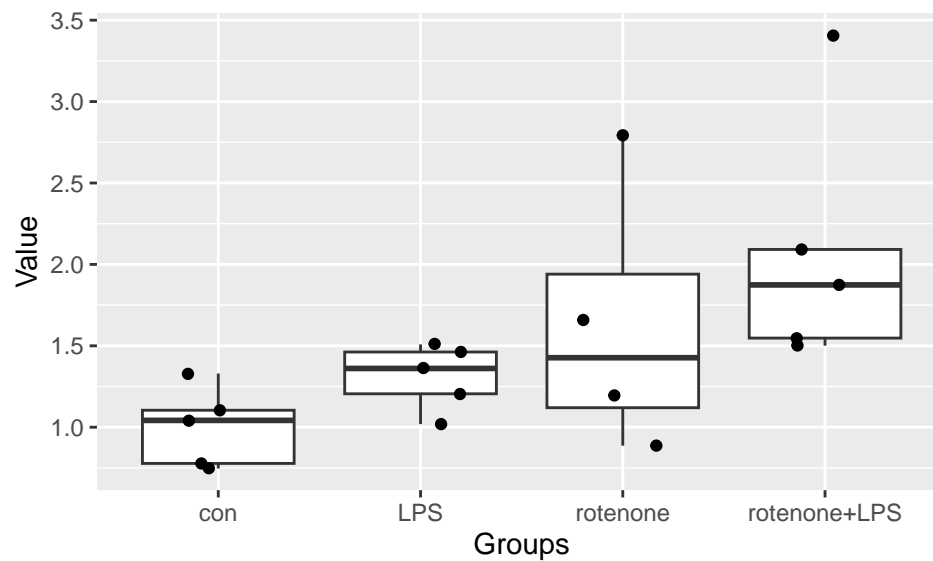

```
##           Df Sum Sq Mean Sq F value Pr(>F)
## d1[, 2]    3  3.204   1.068   3.266 0.0509 .
## Residuals 15  4.905   0.327
## ---
## Signif. codes:  0 '***' 0.001 '**' 0.01 '*' 0.05 '.' 0.1 ' ' 1
```

```
## The result of anova is
## p = 0.0509
## A statistically significant difference do not exist between groups
```

## Fig4\_D.young mice\_rotenone\_qPCR\_IL-10 Data analysis

### Data structure

```
str(d1)
```

```
## 'data.frame':  19 obs. of  3 variables:  
## $ subject: int  1 2 3 4 5 6 7 8 9 10 ...  
## $ group  : chr  "con" "con" "con" "con" ...  
## $ IL.10  : num  0.716 1.103 1.103 1.254 0.824 ...
```

### Explorative data analysis with graphics

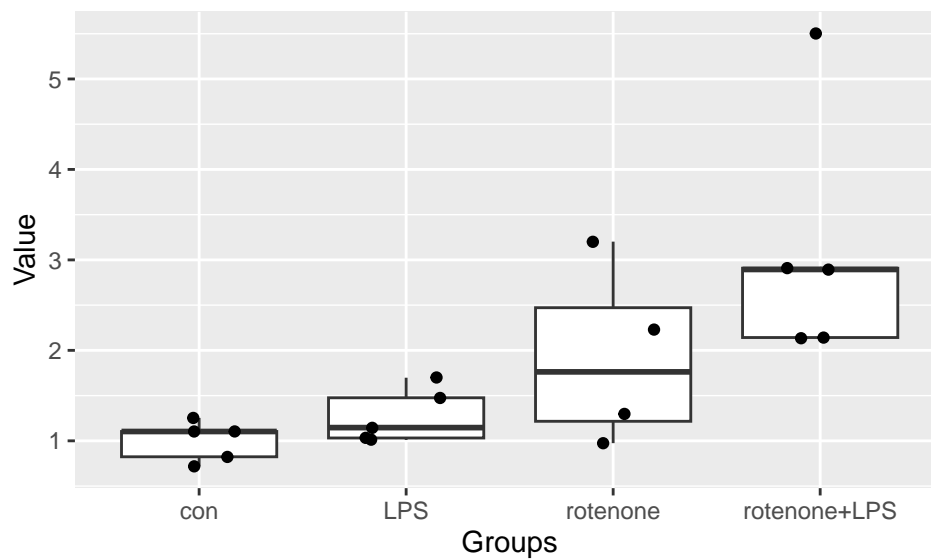

```
##           Df Sum Sq Mean Sq F value Pr(>F)  
## d1[, 2]    3  13.30   4.435   5.899 0.00724 **  
## Residuals 15   11.28   0.752  
## ---  
## Signif. codes:  0 '***' 0.001 '**' 0.01 '*' 0.05 '.' 0.1 ' ' 1  
  
## The result of anova is  
## p = 0.007  
## A statistically significant difference exist between groups
```

```

## Tukey multiple comparisons of means
## 95% family-wise confidence level
##
## Fit: aov(formula = d1[, 3] ~ d1[, 2], data = d1)
##
## $'d1[, 2]'
```

|                          | diff      | lwr        | upr      | p adj     |
|--------------------------|-----------|------------|----------|-----------|
| ## LPS-con               | 0.2722066 | -1.3083880 | 1.852801 | 0.9586713 |
| ## rotenone-con          | 0.9251435 | -0.7513302 | 2.601617 | 0.4128830 |
| ## rotenone+LPS-con      | 2.1160458 | 0.5354512  | 3.696640 | 0.0075171 |
| ## rotenone-LPS          | 0.6529369 | -1.0235368 | 2.329411 | 0.6818143 |
| ## rotenone+LPS-LPS      | 1.8438392 | 0.2632446  | 3.424434 | 0.0199147 |
| ## rotenone+LPS-rotenone | 1.1909023 | -0.4855714 | 2.867376 | 0.2149021 |



## Fig4\_D.young mice\_rotenone\_qPCR\_IL-6 Data analysis

### Data structure

```
str(d1)
```

```
## 'data.frame':  19 obs. of  3 variables:  
## $ subject: int  1 2 3 4 5 6 7 8 9 10 ...  
## $ group  : chr  "con" "con" "con" "con" ...  
## $ IL.6   : num  0.812 1.006 1.12 1.08 0.982 ...
```

### Explorative data analysis with graphics

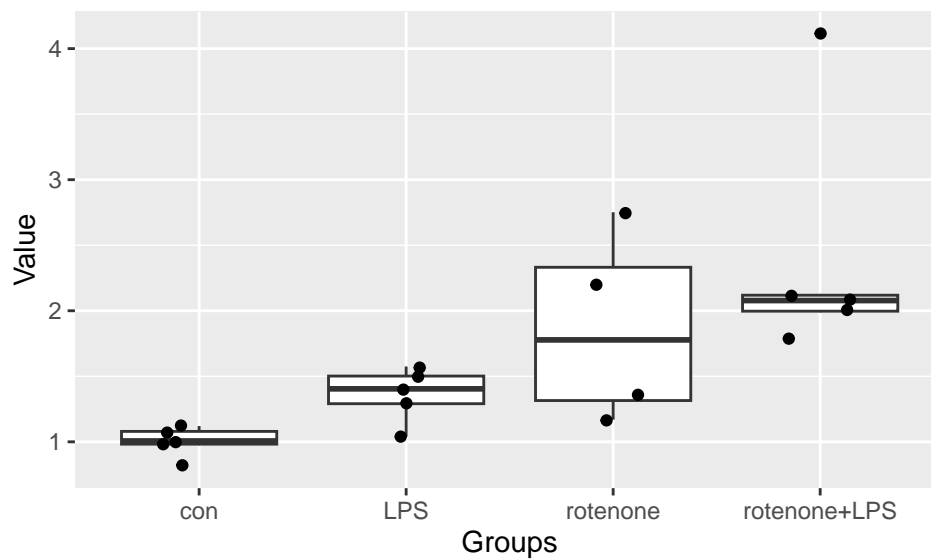

```
##           Df Sum Sq Mean Sq F value Pr(>F)  
## d1[, 2]    3  5.674  1.8914   5.136 0.0122 *  
## Residuals 15  5.525  0.3683  
## ---  
## Signif. codes:  0 '***' 0.001 '**' 0.01 '*' 0.05 '.' 0.1 ' ' 1  
  
## The result of anova is  
## p = 0.012  
## A statistically significant difference exist between groups
```

```

## Tukey multiple comparisons of means
## 95% family-wise confidence level
##
## Fit: aov(formula = d1[, 3] ~ d1[, 2], data = d1)
##
## $'d1[, 2]'
```

|                          | diff      | lwr        | upr      | p adj     |
|--------------------------|-----------|------------|----------|-----------|
| ## LPS-con               | 0.3620128 | -0.7442230 | 1.468249 | 0.7825220 |
| ## rotenone-con          | 0.8689120 | -0.3044283 | 2.042252 | 0.1870809 |
| ## rotenone+LPS-con      | 1.4188310 | 0.3125952  | 2.525067 | 0.0103405 |
| ## rotenone-LPS          | 0.5068992 | -0.6664411 | 1.680239 | 0.6093547 |
| ## rotenone+LPS-LPS      | 1.0568182 | -0.0494176 | 2.163054 | 0.0635486 |
| ## rotenone+LPS-rotenone | 0.5499190 | -0.6234213 | 1.723259 | 0.5469120 |

# Fig4\_E.Western blot\_rotenone\_NLRP3\_Data analysis

Boohwi Hong

```
## Present data is ** Western blot_rotenone_NLRP3.csv **
##
## ** Data structure **
## 'data.frame':  10 obs. of  3 variables:
## $ subject: int  1 2 3 4 5 6 7 8 9 10
## $ group  : chr  "con" "con" "con" "con" ...
## $ NLRP3  : num  0.844 0.886 0.938 1.253 1.079 ...
##
## ** Explorative data analysis with graphics**
```

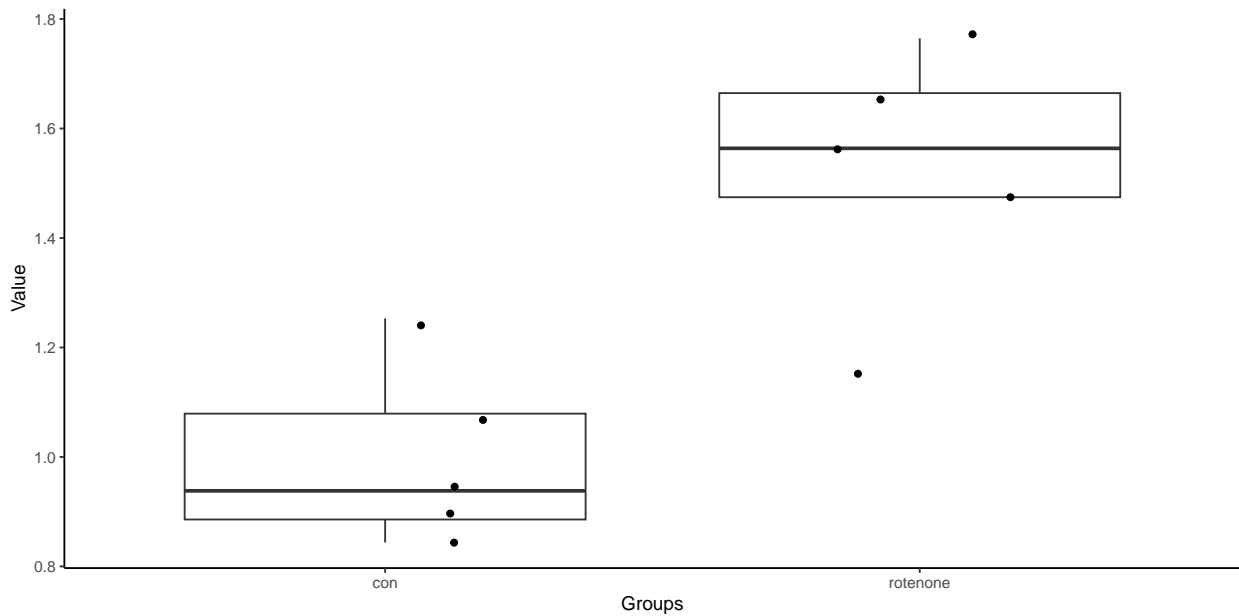

```
## 1. Normality assumption test by Shapiro_Wilk test is
## p = 0.83
## Normality assumption was not rejected
## 2. Equal variance test by Bartlett test is
## p = 0.551
## Equal variance assumption was not rejected
## 3. The result of anova is
## p = 0.003
## A statistically significant difference exist between groups
##
## Tukey multiple comparisons of means
## 95% family-wise confidence level
##
```

```
## Fit: aov(formula = d1[, 3] ~ d1[, 2], data = d1)
##
## $`d1[, 2]`
##           diff           lwr           upr           p adj
## rotenone-con 0.5263294 0.2332297 0.8194291 0.003249
```

# Fig4\_E.Western blot\_rotenone\_pro-IL-1beta\_Data analysis

Boohwi Hong

```
## Present data is ** Western blot_rotenone_pro-IL-1beta.csv **  
##  
## ** Data structure **  
## 'data.frame': 10 obs. of 3 variables:  
## $ subject : int 1 2 3 4 5 6 7 8 9 10  
## $ group : chr "con" "con" "con" "con" ...  
## $ IL.1beta: num 0.626 0.689 0.93 1.409 1.346 ...  
##  
## ** Explorative data analysis with graphics**
```

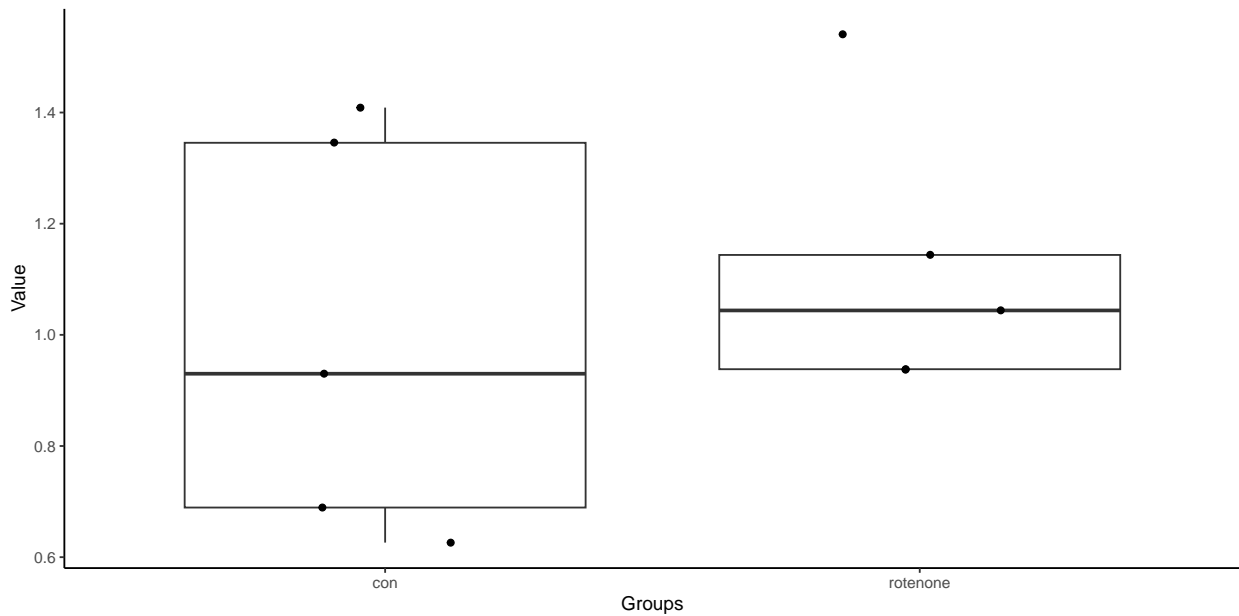

```
## 1. Normality assumption test by Shapiro_Wilk test is  
## p = 0.162  
## Normality assumption was not rejected  
## 2. Equal variance test by Bartlett test is  
## p = 0.486  
## Equal variance assumption was not rejected  
## 3. The result of anova is  
## p = 0.557  
## A statistically significant difference do not exist between groups  
##
```

# Fig4\_E.Western blot\_rotenone\_cleaved-caspase1 Data analysis

Boohwi Hong

```
## Present data is ** Western blot_rotenone_cleaved-caspase1.csv **  
##  
## ** Data structure **  
## 'data.frame': 10 obs. of 3 variables:  
## $ subject : int 1 2 3 4 5 6 7 8 9 10  
## $ group : chr "con" "con" "con" "con" ...  
## $ cleaved.caspase1: num 0.731 0.703 0.97 1.195 1.401 ...  
##  
## ** Explorative data analysis with graphics**
```

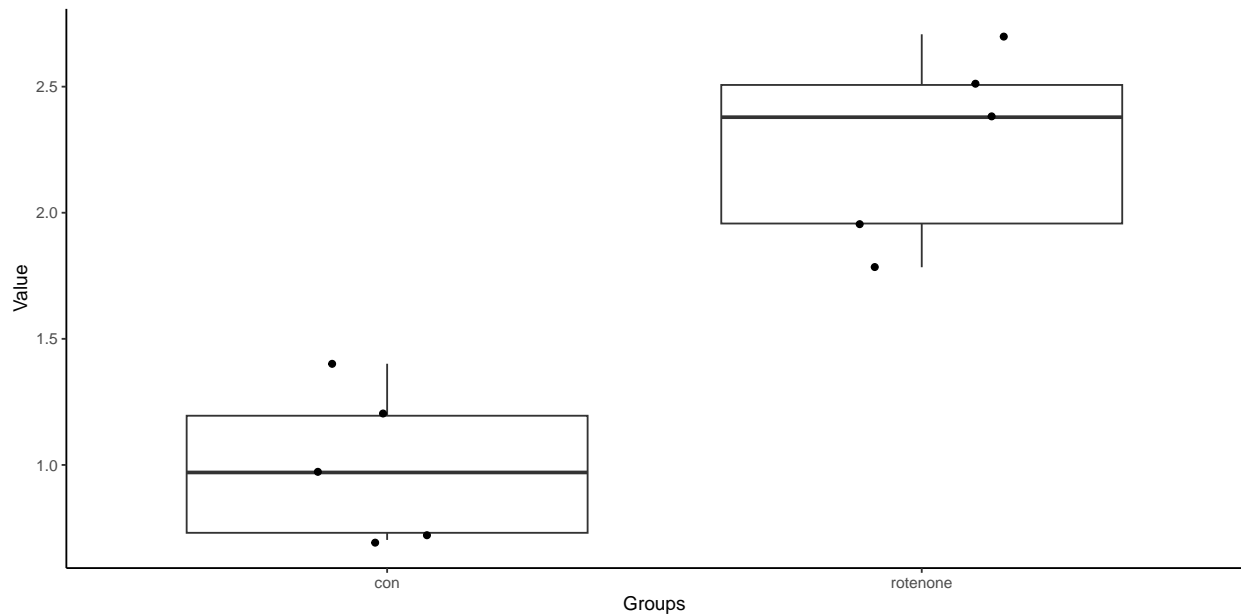

```
## 1. Normality assumption test by Shapiro_Wilk test is  
## p = 0.44  
## Normality assumption was not rejected  
## 2. Equal variance test by Bartlett test is  
## p = 0.641  
## Equal variance assumption was not rejected  
## 3. The result of anova is  
## p = 0.000  
## A statistically significant difference exist between groups  
##  
## Tukey multiple comparisons of means  
## 95% family-wise confidence level  
##
```

```
## Fit: aov(formula = d1[, 3] ~ d1[, 2], data = d1)
##
## $`d1[, 2]`
##           diff      lwr      upr      p adj
## rotenone-con 1.26687 0.7631849 1.770556 0.0004051
```

# Barnes maze\_primary latency Data analysis using R

Boohwi Hong

## Package install

## Data import

## Data structure

```
str(dd)
```

```
## 'data.frame': 172 obs. of 4 variables:  
## $ subject: int 1 2 3 4 5 6 7 8 9 10 ...  
## $ group : chr "con" "con" "con" "con" ...  
## $ trial : chr "day1" "day1" "day1" "day1" ...  
## $ value : num 49.7 57.1 38.3 45.9 96.6 ...
```

```
shapiro.test(dd$value)
```

```
##  
## Shapiro-Wilk normality test  
##  
## data: dd$value  
## W = 0.78515, p-value = 1.287e-14
```



## Explorative data analysis with graphics

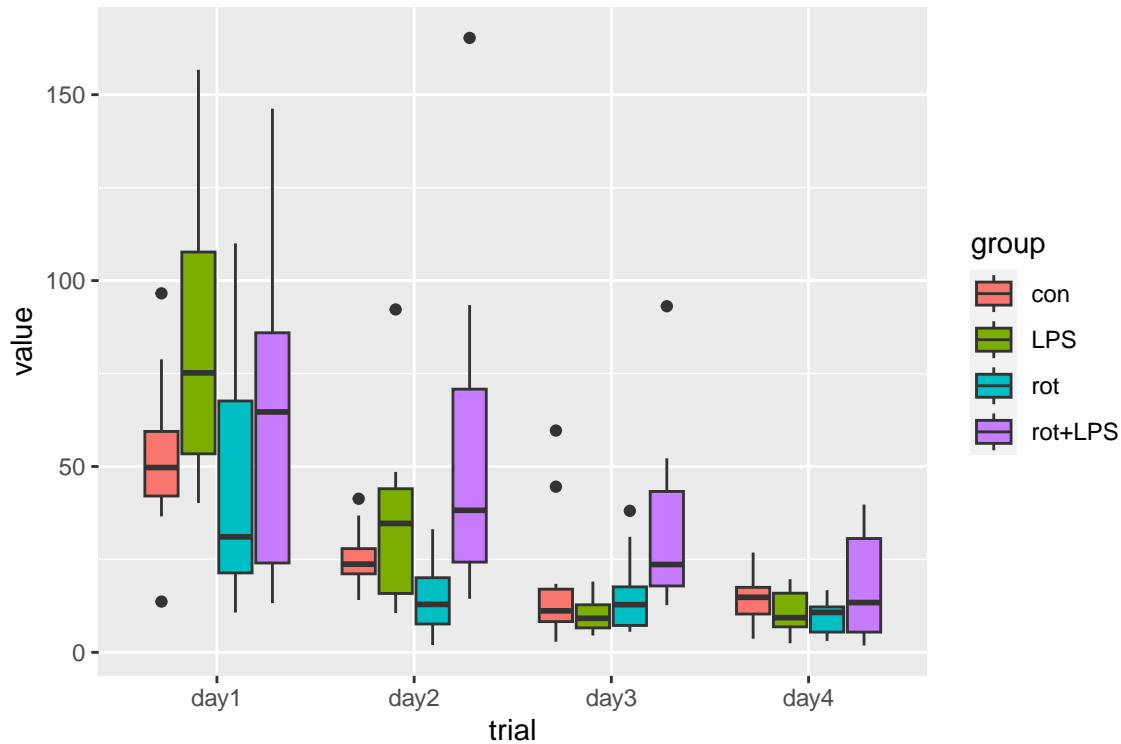

## Model fit

```
## F1 LD F1 Model
## -----
## Check that the order of the time and group levels are correct.
## Time level:  day1 day2 day3 day4
## Group level:  con rot LPS rot+LPS
## If the order is not correct, specify the correct order in time.order or group.order.
```

```
##           Statistic df      p-value
## group      17.51155  3 5.545962e-04
## trial     140.23799  3 3.358494e-30
## group:trial 39.25930  9 1.034406e-05
```

```
##           Statistic      df      p-value
## group      6.504124  2.563998 4.982697e-04
## trial     52.554569  2.568909 1.783804e-29
## group:trial 3.235050  6.376109 2.826849e-03
```

```
##           Statistic      df1      df2      p-value
## group      6.504124  2.563998 31.51396 0.002314232
```

## Interpretation of result

## 1. Difference exist between groups

## p = 0.000

## 2. Difference exist between measurement points

## p = 0.000

## 3. Significant interaction exist between groups and measurement points

## p = 0.003

## Day 1

### Explorative data analysis with graphics

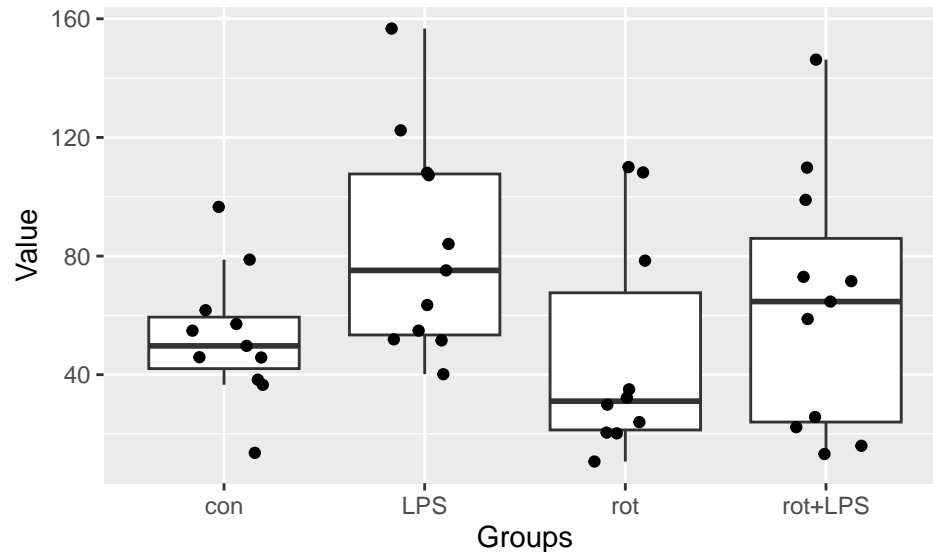

## Result

## 1. Normality assumption test by Shapiro\_Wilk test is

## p = 0.047

## Normality assumption was rejected

## 2. The result of Kruskal-Wallis test:

## p = 0.101

## A statistically significant difference do not exist between groups

## Day 2

### Explorative data analysis with graphics

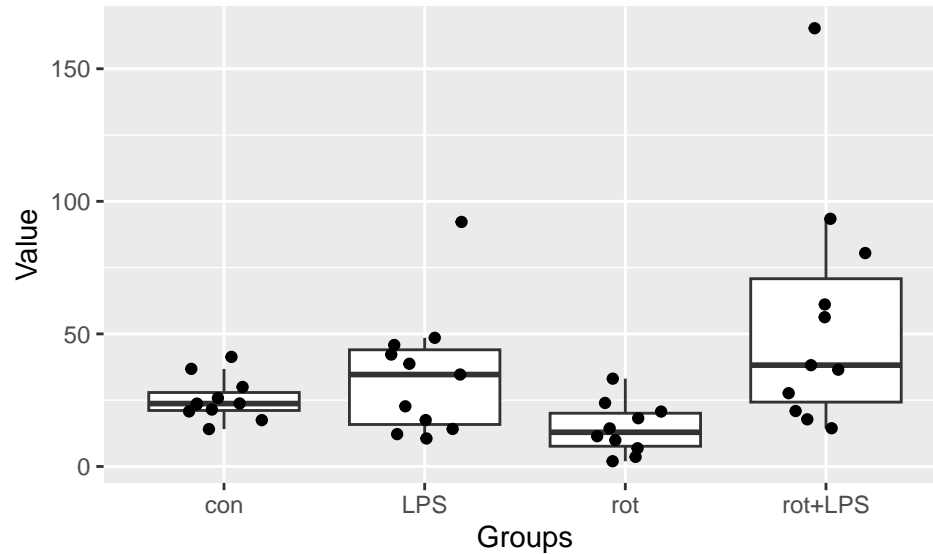

### Result

```
## 1. Normality assumption test by Shapiro_Wilk test is
## p = 0
## Normality assumption was rejected
## 2. The result of Kruskal_Wallis test:
## p = 0.005
## A statistically significant difference exist between groups

## Dunn (1964) Kruskal-Wallis multiple comparison

## p-values adjusted with the Benjamini-Hochberg method.

##      Comparison      Z      P.unadj      P.adj
## 1    con - LPS -0.4414607 0.6588794943 0.658879494
## 2    con - rot  1.9734941 0.0484392981 0.096878596
## 3    LPS - rot  2.4043156 0.0162027771 0.048608331
## 4 con - rot+LPS -1.5960503 0.1104775669 0.165716350
## 5 LPS - rot+LPS -1.1545896 0.2482585406 0.297910249
## 6 rot - rot+LPS -3.5310797 0.0004138671 0.002483202
```

## Day 3

### Explorative data analysis with graphics

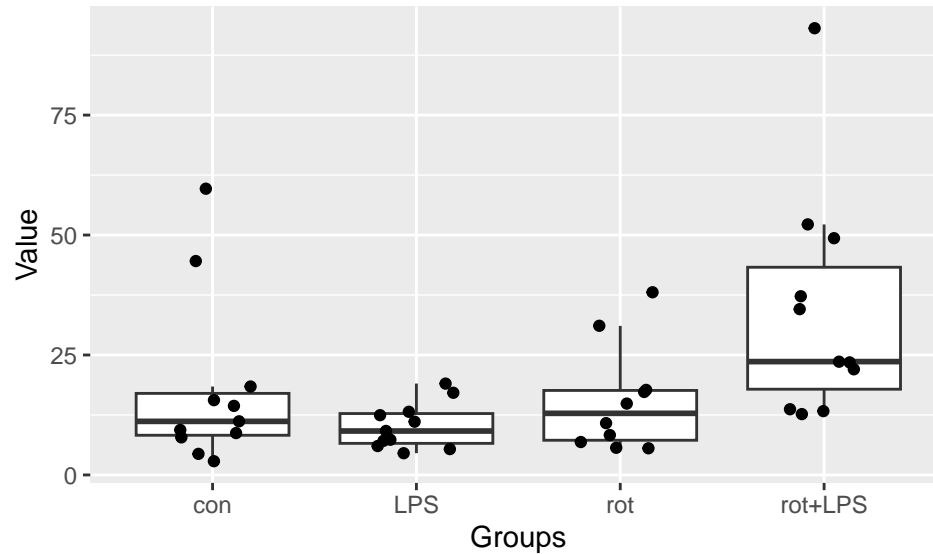

## Result

```
## 1. Normality assumption test by Shapiro_Wilk test is
## p = 0
## Normality assumption was rejected
## 2. The result of Kruskal_Wallis test:
## p = 0.006
## A statistically significant difference exist between groups
```

```
## Dunn (1964) Kruskal-Wallis multiple comparison
```

```
## p-values adjusted with the Benjamini-Hochberg method.
```

```
##      Comparison      Z      P.unadj      P.adj
## 1    con - LPS  1.00177624 0.3164516737 0.474677511
## 2    con - rot -0.01988407 0.9841358518 0.984135852
## 3    LPS - rot -0.99751758 0.3185133449 0.382216014
## 4 con - rot+LPS -2.37709617 0.0174495380 0.052348614
## 5 LPS - rot+LPS -3.37887241 0.0007278378 0.004367027
## 6 rot - rot+LPS -2.29992425 0.0214525117 0.042905023
```

## Day 4

### Explorative data analysis with graphics

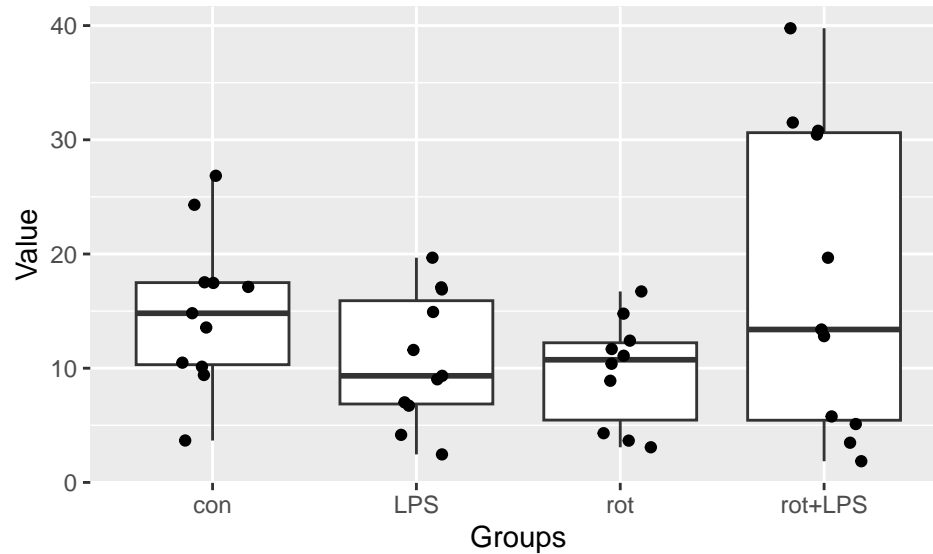

## Result

```
## 1. Normality assumption test by Shapiro_Wilk test is
## p = 0.757
## Normality assumption was not rejected
## 2. Equal variance test by Bartlett test is
## p = 0.004
## Equal variance assumption was rejected
## 3. The result of Welch ANOVA is
## p = 0.119
## A statistically significant difference do not exist between groups
```

# Fig4\_F.Barnes maze primary length Data analysis using R

Boohwi Hong

## Package install

## Data import

## Data structure

```
str(dd)
```

```
## 'data.frame': 172 obs. of 4 variables:  
## $ subject: int 1 2 3 4 5 6 7 8 9 10 ...  
## $ group : chr "con" "con" "con" "con" ...  
## $ trial : chr "day1" "day1" "day1" "day1" ...  
## $ value : num 503 578 361 418 856 ...
```

```
shapiro.test(dd$value)
```

```
##  
## Shapiro-Wilk normality test  
##  
## data: dd$value  
## W = 0.84794, p-value = 4.277e-12
```

## Explorative data analysis with graphics

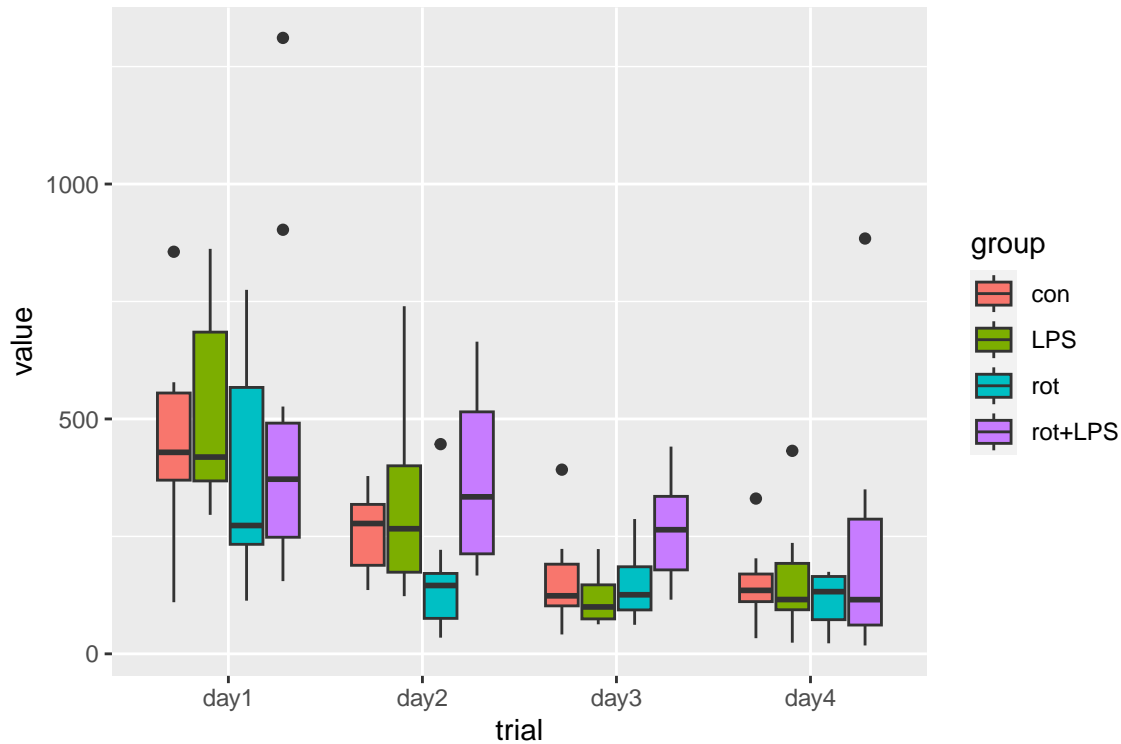

## Model fit

```
## F1 LD F1 Model
## -----
## Check that the order of the time and group levels are correct.
## Time level:  day1 day2 day3 day4
## Group level:  con rot LPS rot+LPS
## If the order is not correct, specify the correct order in time.order or group.order.
```

```
##           Statistic df      p-value
## group      22.64569  3 4.786603e-05
## trial      78.15374  3 7.638369e-17
## group:trial 43.74437  9 1.573046e-06
```

```
##           Statistic      df      p-value
## group      7.091432  2.865242 1.239577e-04
## trial     37.504403  2.614484 1.893424e-21
## group:trial 2.117680  6.297660 4.484102e-02
```

```
##           Statistic      df1      df2      p-value
## group      7.091432  2.865242 36.8894 0.0008215044
```

## Interpretation of result

## 1. Difference exist between groups

## p = 0.000

## 2. Difference exist between measurement points

## p = 0.000

## 3. Significant interaction exist between groups and measurement points

## p = 0.045

## Day 1

### Explorative data analysis with graphics

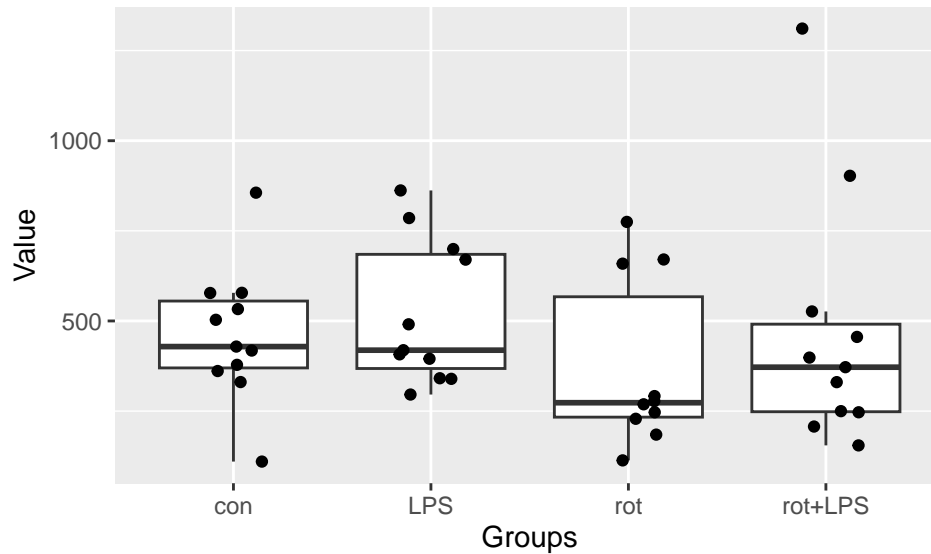

## Result

## 1. Normality assumption test by Shapiro\_Wilk test is

## p = 0.001

## Normality assumption was rejected

## 2. The result of Kruskal-Wallis test:

## p = 0.212

## A statistically significant difference do not exist between groups



## Day 2

### Explorative data analysis with graphics

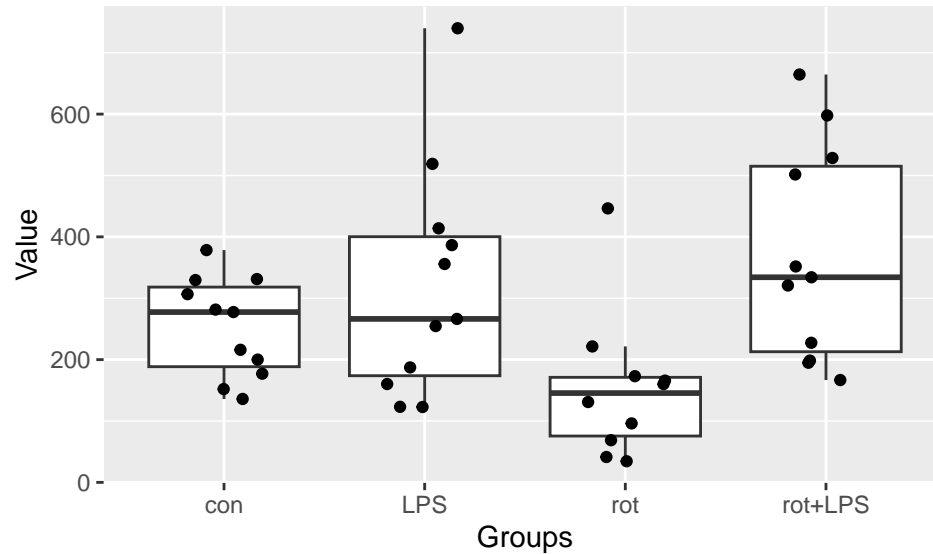

## Result

```
## 1. Normality assumption test by Shapiro_Wilk test is
## p = 0.044
## Normality assumption was rejected
## 2. The result of Kruskal_Wallis test:
## p = 0.008
## A statistically significant difference exist between groups

## Dunn (1964) Kruskal-Wallis multiple comparison

## p-values adjusted with the Benjamini-Hochberg method.

##      Comparison      Z      P.unadj      P.adj
## 1   con - LPS -0.4923985 0.6224376649 0.622437665
## 2   con - rot  1.9867501 0.0469500935 0.093900187
## 3   LPS - rot  2.4672819 0.0136143147 0.040842944
## 4 con - rot+LPS -1.3583407 0.1743556114 0.261533417
## 5 LPS - rot+LPS -0.8659422 0.3865218726 0.463826247
## 6 rot - rot+LPS -3.3123549 0.0009251411 0.005550846
```

## Day 3

### Explorative data analysis with graphics

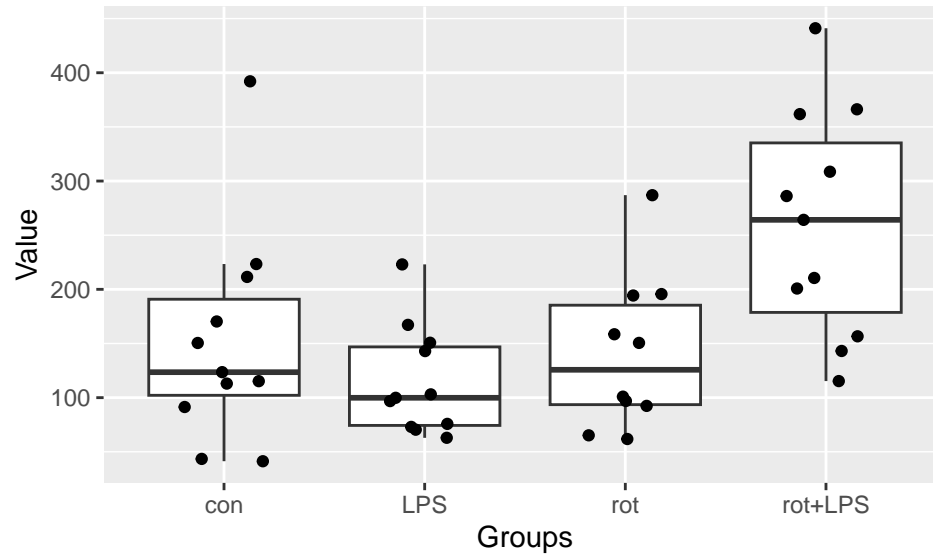

## Result

```
## 1. Normality assumption test by Shapiro_Wilk test is
## p = 0.11
## Normality assumption was not rejected
## 2. Equal variance test by Bartlett test is
## p = 0.123
## Equal variance assumption was not rejected
## 3. The result of anova is
## p = 0.001
## A statistically significant difference exist between groups

## Tukey multiple comparisons of means
## 95% family-wise confidence level
##
## Fit: aov(formula = d1[, 3] ~ d1[, 2], data = d1)
##
## $'d1[, 2]'
```

|                | diff      | lwr        | upr       | p adj     |
|----------------|-----------|------------|-----------|-----------|
| ## LPS-con     | -37.25072 | -133.74400 | 59.24257  | 0.7296070 |
| ## rot-con     | -11.98749 | -110.86368 | 86.88870  | 0.9879215 |
| ## rot+LPS-con | 107.17708 | 10.68380   | 203.67037 | 0.0244320 |
| ## rot-LPS     | 25.26322  | -73.61297  | 124.13941 | 0.9019594 |
| ## rot+LPS-LPS | 144.42780 | 47.93452   | 240.92108 | 0.0014330 |
| ## rot+LPS-rot | 119.16458 | 20.28839   | 218.04077 | 0.0127491 |

## Day 4

### Explorative data analysis with graphics

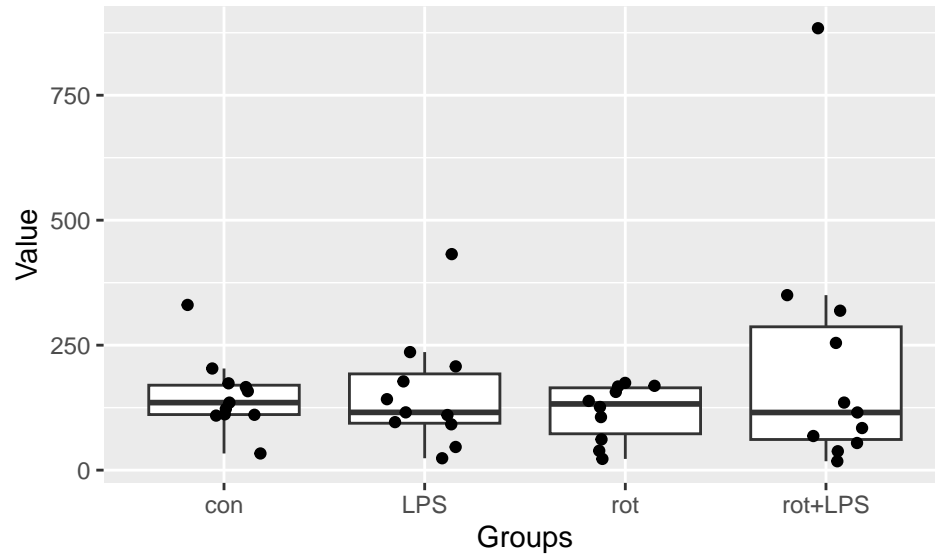

## Result

```
## 1. Normality assumption test by Shapiro_Wilk test is
## p = 0
## Normality assumption was rejected
## 2. The result of Kruskal_Wallis test:
## p = 0.913
## A statistically significant difference do not exist between groups
```

# Fig4\_F.Barnes maze\_primary errors Data analysis using R

Boohwi Hong

## Package install

## Data import

## Data structure

```
str(dd)
```

```
## 'data.frame': 172 obs. of 4 variables:  
## $ subject: int 1 2 3 4 5 6 7 8 9 10 ...  
## $ group : chr "con" "con" "con" "con" ...  
## $ trial : chr "day1" "day1" "day1" "day1" ...  
## $ value : num 9.67 12 6.67 7 15.67 ...
```

```
shapiro.test(dd$value)
```

```
##  
## Shapiro-Wilk normality test  
##  
## data: dd$value  
## W = 0.93412, p-value = 4.343e-07
```

## Explorative data analysis with graphics

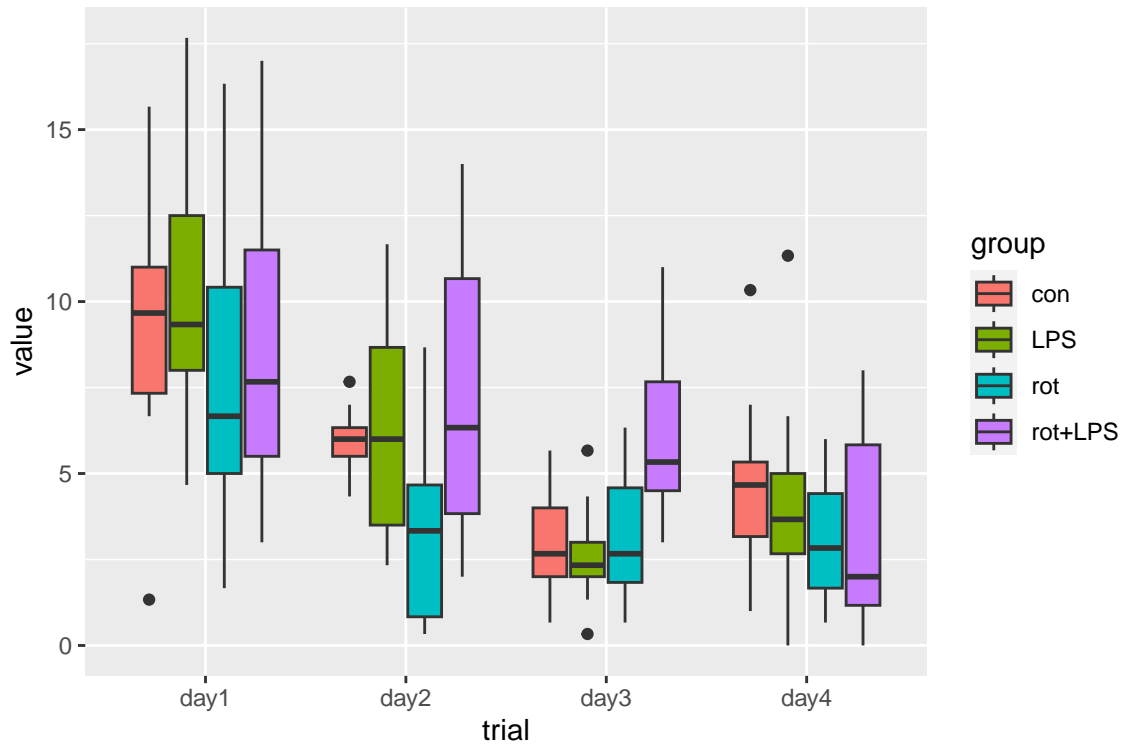

## Model fit

```
## F1 LD F1 Model
## -----
## Check that the order of the time and group levels are correct.
## Time level:  day1 day2 day3 day4
## Group level:  con rot LPS rot+LPS
## If the order is not correct, specify the correct order in time.order or group.order.
```

```
##           Statistic df      p-value
## group      14.53811  3 2.257102e-03
## trial      68.25298  3 1.009909e-14
## group:trial 34.79023  9 6.487847e-05
```

```
##           Statistic      df      p-value
## group      3.982147  2.481627 1.205689e-02
## trial      27.380497  2.769167 1.579823e-16
## group:trial 2.350883  6.998083 2.127205e-02
```

```
##           Statistic      df1      df2      p-value
## group      3.982147  2.481627 30.17444 0.0221079
```

## Interpretation of result

## 1. Difference exist between groups

## p = 0.012

## 2. Difference exist between measurement points

## p = 0.000

## 3. Significant interaction exist between groups and measurement points

## p = 0.021

## Day 1

### Explorative data analysis with graphics

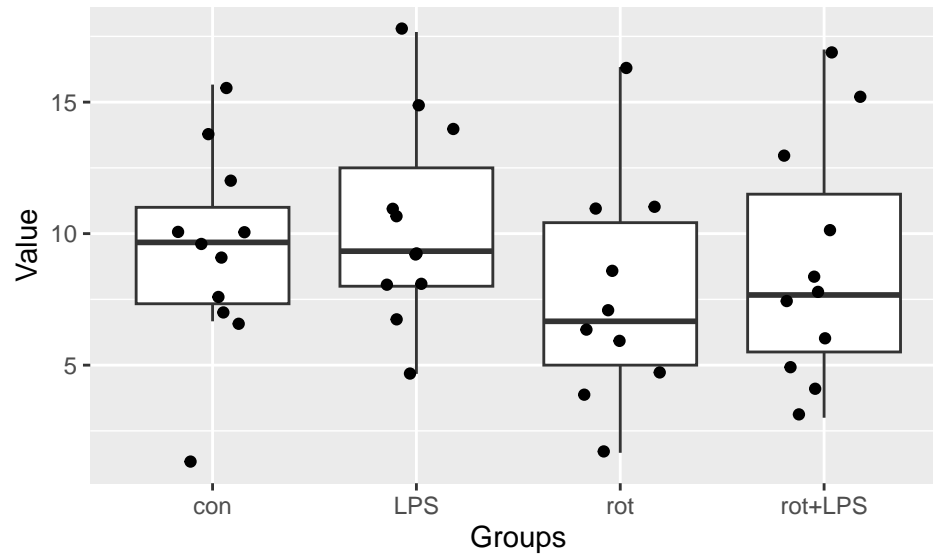

## Result

## 1. Normality assumption test by Shapiro\_Wilk test is

## p = 0.347

## Normality assumption was not rejected

## 2. Equal variance test by Bartlett test is

## p = 0.930

## Equal variance assumption was not rejected

## 3. The result of anova is

## p = 0.5065

## A statistically significant difference do not exist between groups

## Day 2

### Explorative data analysis with graphics

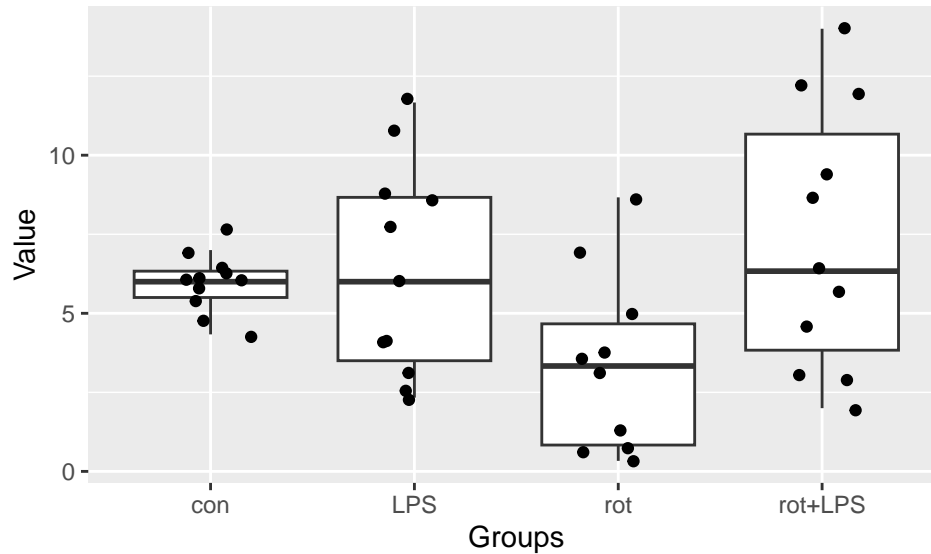

## Result

```
## 1. Normality assumption test by Shapiro_Wilk test is
## p = 0.365
## Normality assumption was not rejected
## 2. Equal variance test by Bartlett test is
## p = 0.001
## Equal variance assumption was rejected
## 3. The result of Welch ANOVA is
## p = 0.066
## A statistically significant difference do not exist between groups
```

## Day 3

### Explorative data analysis with graphics

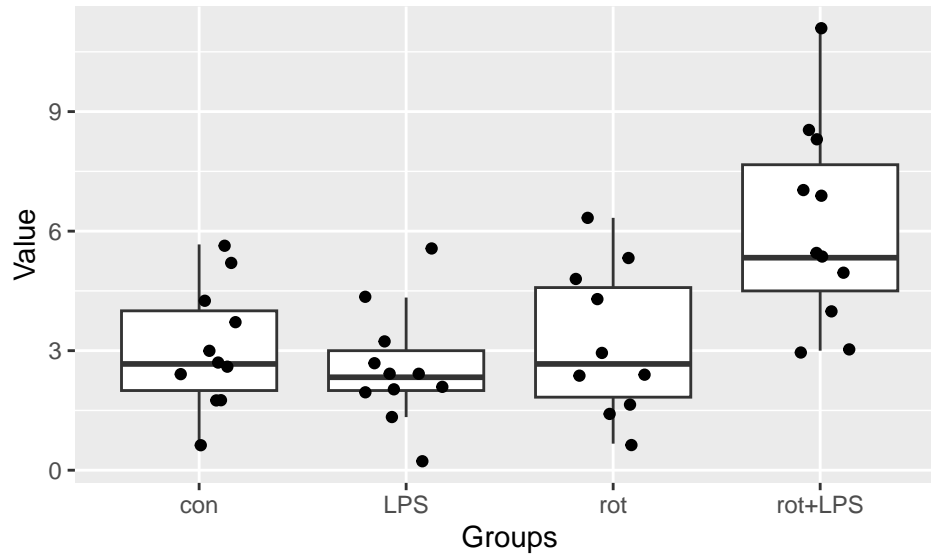

## Result

```
## 1. Normality assumption test by Shapiro_Wilk test is
## p = 0.347
## Normality assumption was not rejected
## 2. Equal variance test by Bartlett test is
## p = 0.298
## Equal variance assumption was not rejected
## 3. The result of anova is
## p = 0.000
## A statistically significant difference exist between groups

## Tukey multiple comparisons of means
## 95% family-wise confidence level
##
## Fit: aov(formula = d1[, 3] ~ d1[, 2], data = d1)
##
## $'d1[, 2]'
```

|             | diff       | lwr        | upr      | p adj     |
|-------------|------------|------------|----------|-----------|
| LPS-con     | -0.4848485 | -2.6535179 | 1.683821 | 0.9314656 |
| rot-con     | 0.1393939  | -2.0828309 | 2.361619 | 0.9982743 |
| rot+LPS-con | 3.0909091  | 0.9222397  | 5.259578 | 0.0025009 |
| rot-LPS     | 0.6242424  | -1.5979824 | 2.846467 | 0.8744954 |
| rot+LPS-LPS | 3.5757576  | 1.4070882  | 5.744427 | 0.0004239 |
| rot+LPS-rot | 2.9515152  | 0.7292903  | 5.173740 | 0.0052201 |



## Day 4

### Explorative data analysis with graphics

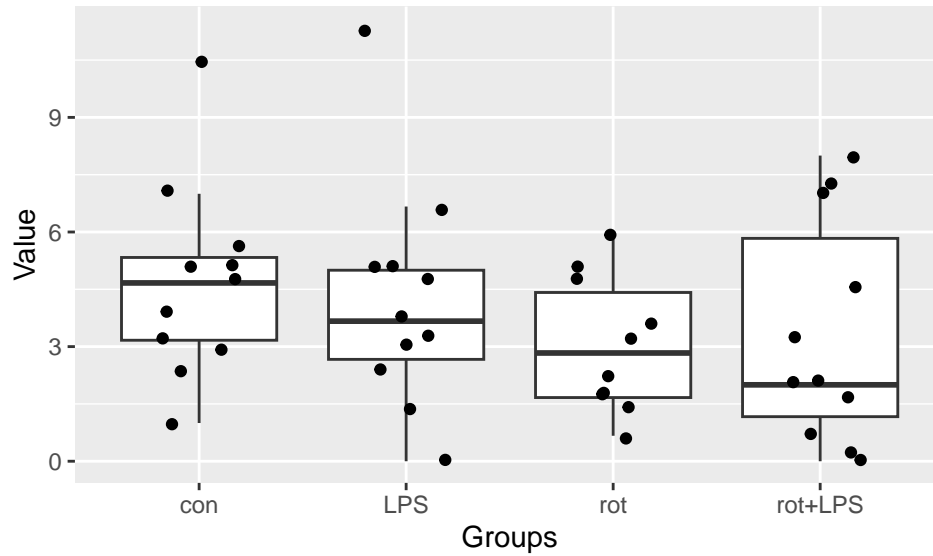

## Result

```
## 1. Normality assumption test by Shapiro_Wilk test is  
## p = 0.09  
## Normality assumption was not rejected  
## 2. Equal variance test by Bartlett test is  
## p = 0.435  
## Equal variance assumption was not rejected  
## 3. The result of anova is  
## p = 0.4623  
## A statistically significant difference do not exist between groups
```

# Fig4\_H.Barnes maze\_Probe test\_duration\_percent Data analysis

Boohwi Hong

## Package install

## Data import

## Data structure

```
str(d1)
```

```
## 'data.frame': 43 obs. of 3 variables:  
## $ subject : int 1 2 3 4 5 6 7 8 9 10 ...  
## $ group : chr "con" "con" "con" "con" ...  
## $ Duration: num 16.9 51.7 26.2 37.3 41.5 ...
```

## Explorative data analysis with graphics

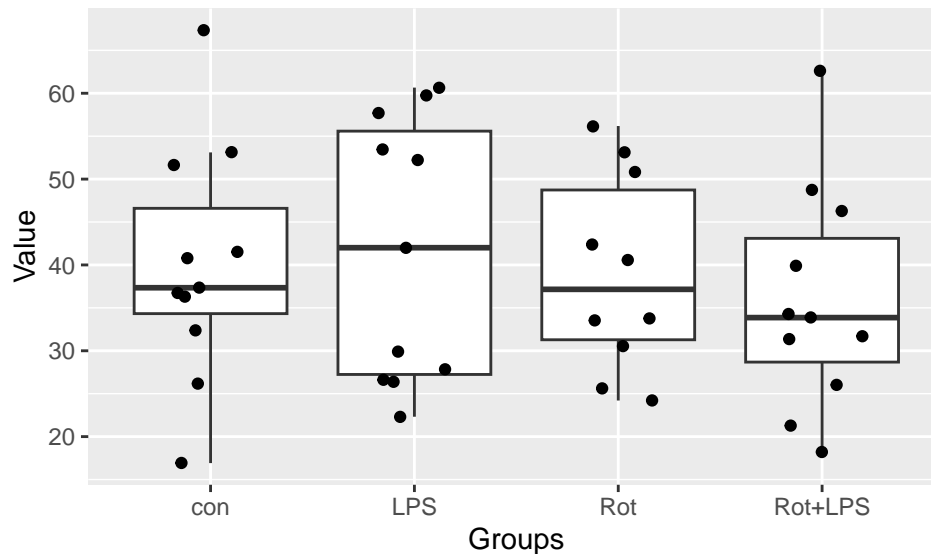

Easystat function developed by S. Park (available at <https://rpubs.com/goodlebang>)

## Statistical Result

```
easystat(d1)
```

```
## 1. Normality assumption test by Shapiro_Wilk test is  
## p = 0.185  
## Normality assumption was not rejected  
## 2. Equal variance test by Bartlett test is  
## p = 0.846  
## Equal variance assumption was not rejected  
## 3. The result of anova is  
## p = 0.7753  
## A statistically significant difference do not exist between groups
```

# Fig4\_H.Barnes maze\_Probe test\_path length Data analysis

Boohwi Hong

## Package install

## Data import

## Data structure

```
str(d1)
```

```
## 'data.frame': 43 obs. of 3 variables:  
## $ subject : int 1 2 3 4 5 6 7 8 9 10 ...  
## $ group : chr "con" "con" "con" "con" ...  
## $ Duration: num 2.836 0.903 0.219 3.894 0.335 ...
```

## Explorative data analysis with graphics

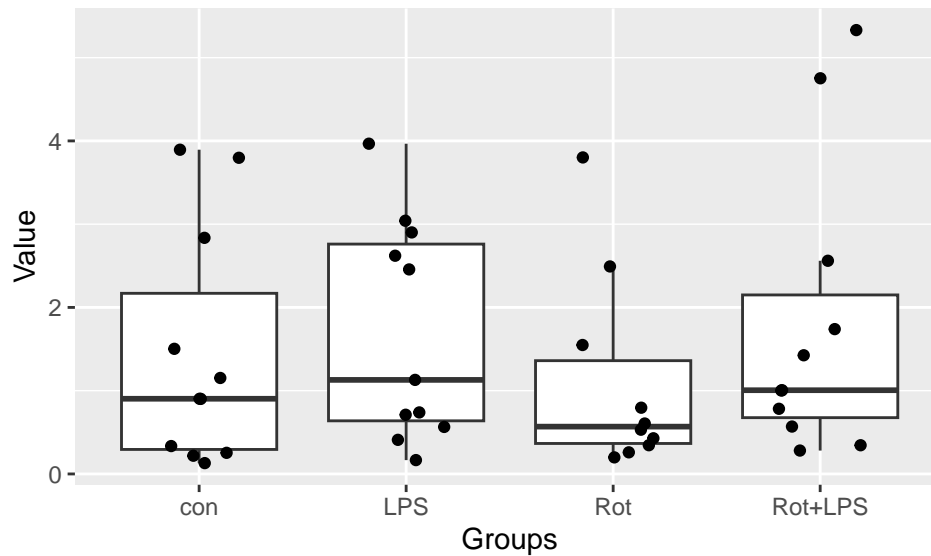

Easystat function developed by S. Park (available at <https://rpubs.com/goodlebang>)

## Statistical Result

```
easystat(d1)
```

```
## 1. Normality assumption test by Shapiro_Wilk test is  
## p = 0  
## Normality assumption was rejected  
## 2. The result of Kruskal-Wallis test:  
## p = 0.577  
## A statistically significant difference do not exist between groups
```

# Fig4\_H.Barnes maze\_Probe test\_latency Data analysis

Boohwi Hong

## Package install

## Data import

## Data structure

```
str(d1)
```

```
## 'data.frame': 43 obs. of 3 variables:  
## $ subject: int 1 2 3 4 5 6 7 8 9 10 ...  
## $ group : chr "con" "con" "con" "con" ...  
## $ Latency: num 34.5 7.03 0.6 43.2 1.67 ...
```

## Explorative data analysis with graphics

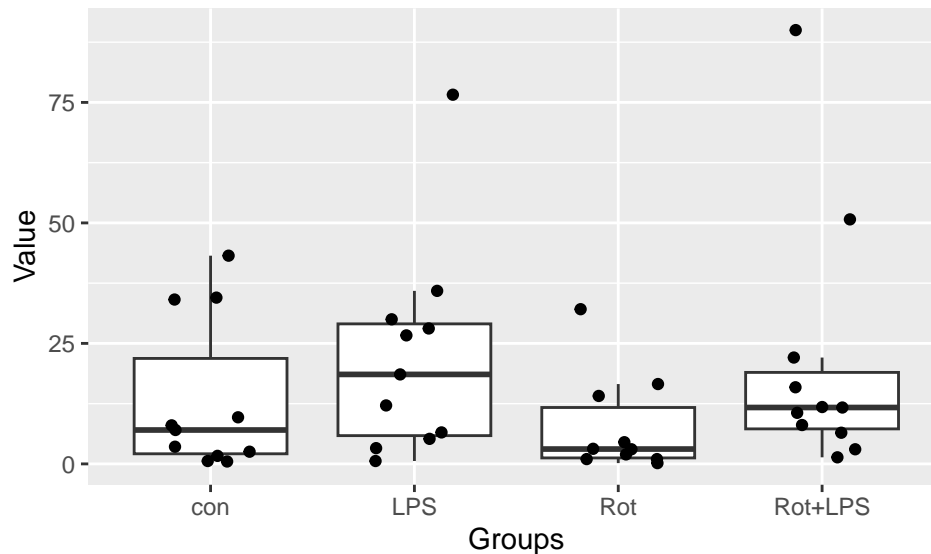

Easystat function developed by S. Park (available at <https://rpubs.com/goodlebang>)

## Statistical Result

```
easystat(d1)
```

```
## 1. Normality assumption test by Shapiro_Wilk test is  
## p = 0  
## Normality assumption was rejected  
## 2. The result of Kruskal-Wallis test:  
## p = 0.148  
## A statistically significant difference do not exist between groups
```

# Fig4\_I.Fear chamber\_freezing\_percent Data analysis

Boohwi Hong

## Package install

## Data import

## Data structure

```
str(d1)
```

```
## 'data.frame': 43 obs. of 3 variables:  
## $ subject : int 1 2 3 4 5 6 7 8 9 10 ...  
## $ group : chr "con" "con" "con" "con" ...  
## $ freezing: num 85.7 60 87.2 66.4 73.9 ...
```

## Explorative data analysis with graphics

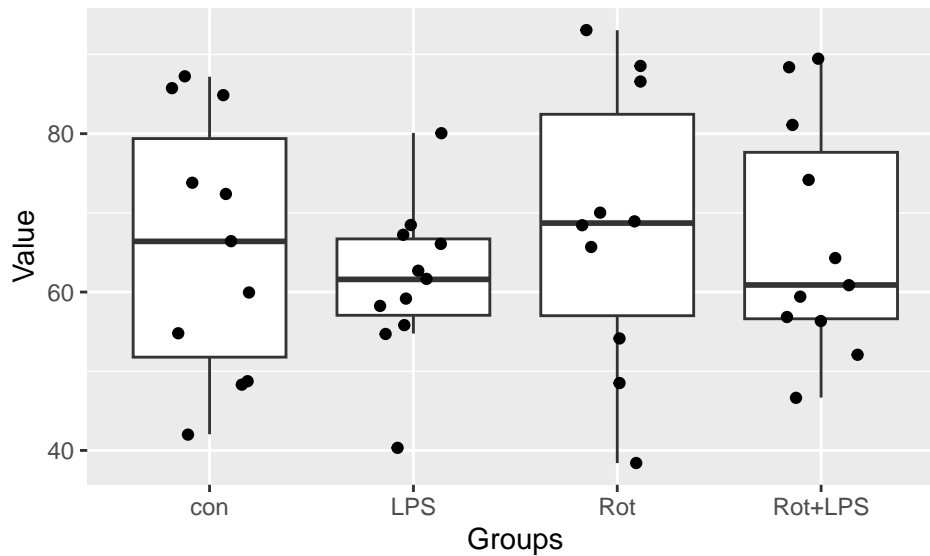



Easystat function developed by S. Park (available at <https://rpubs.com/goodlebang>)

## Statistical Result

```
easystat(d1)
```

```
## 1. Normality assumption test by Shapiro_Wilk test is
## p = 0.236
## Normality assumption was not rejected
## 2. Equal variance test by Bartlett test is
## p = 0.363
## Equal variance assumption was not rejected
## 3. The result of anova is
## p = 0.7439
## A statistically significant difference do not exist between groups
```

# Figure5 Statistics

## Fig5\_B.LPS post12days\_OCR\_Basal Data analysis

### Data structure

```
str(d1)
```

```
## 'data.frame':  11 obs. of  4 variables:  
## $ subject: int  1 2 3 4 5 6 7 8 9 10 ...  
## $ group  : chr  "con" "con" "con" "con" ...  
## $ OCR    : num  189 250 195 185 208 ...  
## $ X      : logi  NA NA NA NA NA NA ...
```

### Explorative data analysis with graphics

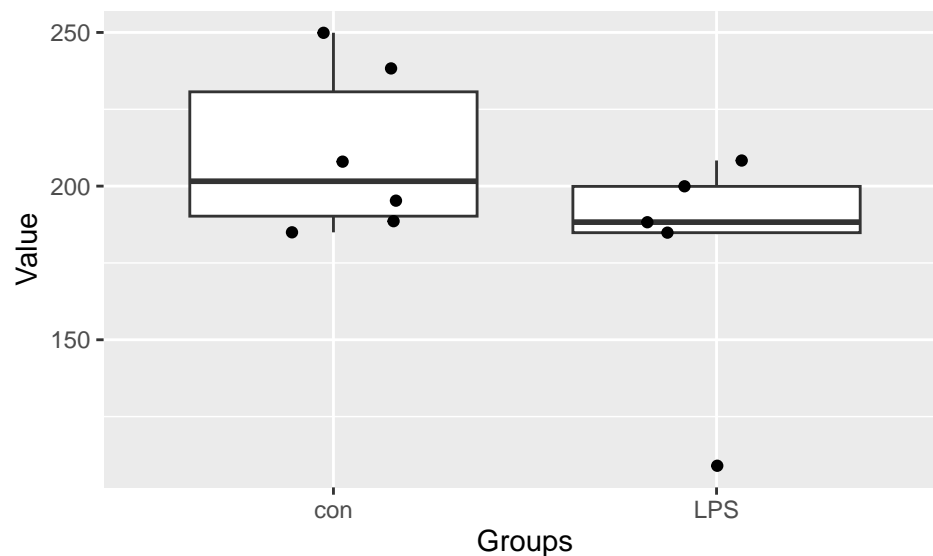

```
##  
## Welch Two Sample t-test  
##  
## data: value by group  
## t = 1.5625, df = 6.8941, p-value = 0.1628  
## alternative hypothesis: true difference in means between group con and group LPS is not equal to 0  
## 95 percent confidence interval:  
## -16.95547 82.40801  
## sample estimates:  
## mean in group con mean in group LPS  
## 210.8103 178.0841
```

```
## The result of t-test:  
## p = 0.163  
## A statistically significant difference do not exist between groups
```

## Fig5\_B.LPS post 12days\_OCR\_State3 Data analysis

### Data structure

```
str(d1)
```

```
## 'data.frame':  11 obs. of  4 variables:  
## $ subject: int  1 2 3 4 5 6 7 8 9 10 ...  
## $ group  : chr  "con" "con" "con" "con" ...  
## $ OCR    : num  591 750 634 625 465 ...  
## $ X      : logi  NA NA NA NA NA NA ...
```

### Explorative data analysis with graphics

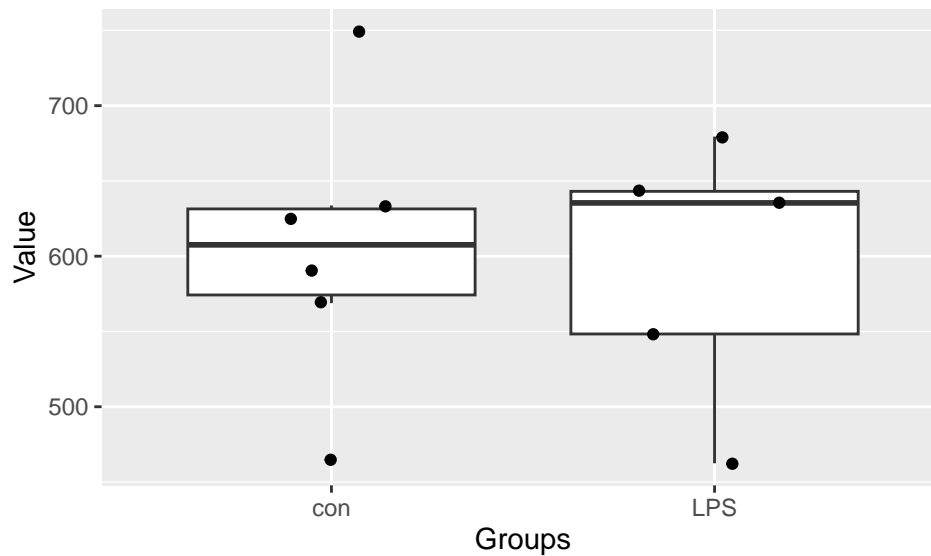

```
##  
## Welch Two Sample t-test  
##  
## data: value by group  
## t = 0.21207, df = 8.8176, p-value = 0.8369  
## alternative hypothesis: true difference in means between group con and group LPS is not equal to 0  
## 95 percent confidence interval:  
## -112.4321 135.6123  
## sample estimates:  
## mean in group con mean in group LPS  
## 605.3309 593.7408
```

```
## The result of t-test:  
## p = 0.837  
## A statistically significant difference do not exist between groups
```

## Fig5\_B.LPS post 12days\_OCR\_State4o Data analysis

### Data structure

```
str(d1)

## 'data.frame':  11 obs. of  4 variables:
## $ subject: int  1 2 3 4 5 6 7 8 9 10 ...
## $ group  : chr  "con" "con" "con" "con" ...
## $ OCR    : num  147 206 142 128 106 ...
## $ X      : logi  NA NA NA NA NA NA ...
```

### Explorative data analysis with graphics

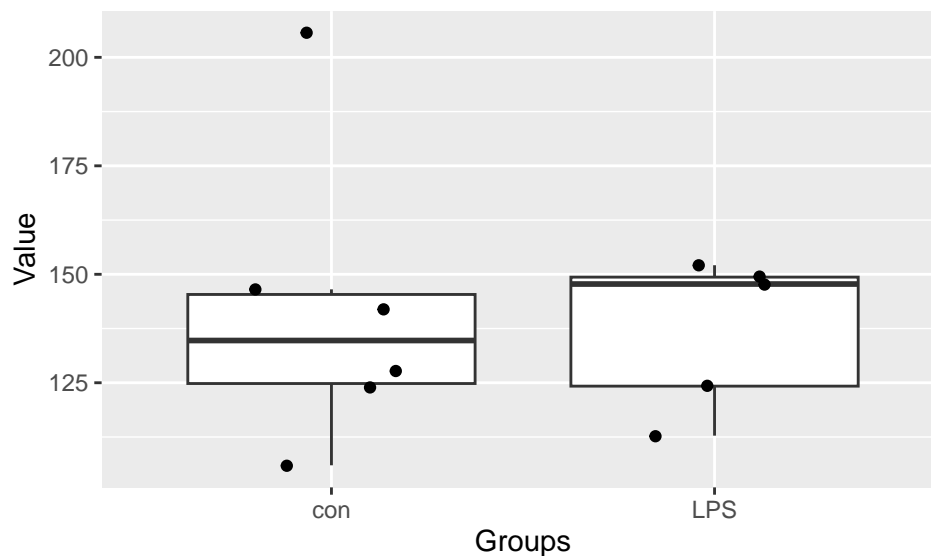

```
##
## Welch Two Sample t-test
##
## data:  value by group
## t = 0.29025, df = 7.7, p-value = 0.7793
## alternative hypothesis: true difference in means between group con and group LPS is not equal to 0
## 95 percent confidence interval:
## -32.68473  42.02457
## sample estimates:
## mean in group con mean in group LPS
##      141.9135      137.2436
```

```
## The result of t-test:  
## p = 0.779  
## A statistically significant difference do not exist between groups
```



## Fig5\_B.LPS post 12days\_OCR\_State3u Data analysis

### Data structure

```
str(d1)
```

```
## 'data.frame':  11 obs. of  4 variables:
## $ subject: int  1 2 3 4 5 6 7 8 9 10 ...
## $ group  : chr  "con" "con" "con" "con" ...
## $ OCR    : num  491 702 574 499 268 ...
## $ X      : logi  NA NA NA NA NA NA ...
```

### Explorative data analysis with graphics

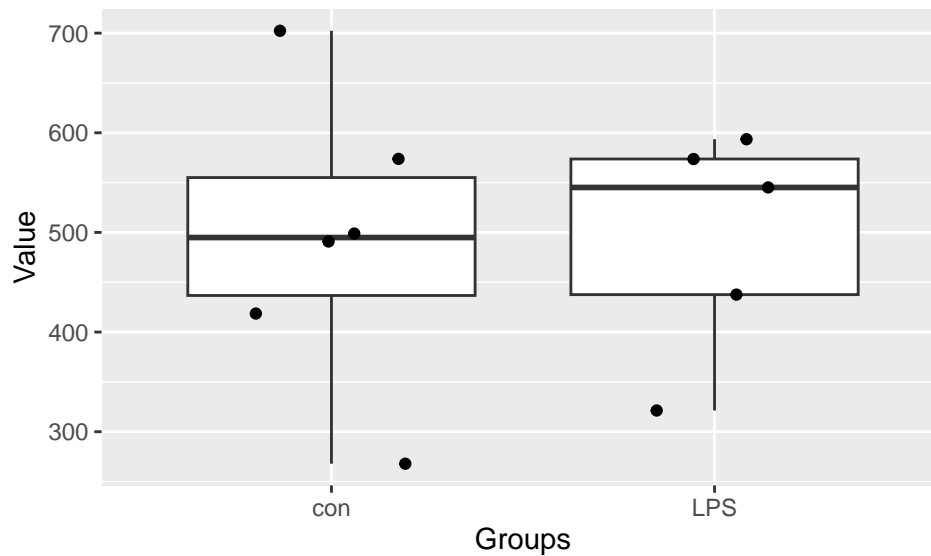

```
##
## Welch Two Sample t-test
##
## data:  value by group
## t = -0.027627, df = 8.9816, p-value = 0.9786
## alternative hypothesis: true difference in means between group con and group LPS is not equal to 0
## 95 percent confidence interval:
##  -179.6095  175.2767
## sample estimates:
## mean in group con mean in group LPS
##      492.0783      494.2447
```

```
## The result of t-test:  
## p = 0.979  
## A statistically significant difference do not exist between groups
```

## Fig5\_C.LPS post 12days\_RCR Data analysis

### Data structure

```
str(d1)
```

```
## 'data.frame':  11 obs. of  3 variables:  
## $ subject: int  1 2 3 4 5 6 7 8 9 10 ...  
## $ group  : chr  "con" "con" "con" "con" ...  
## $ RCR    : num  2.84 2.57 3.02 3.35 2.56 ...
```

### Explorative data analysis with graphics

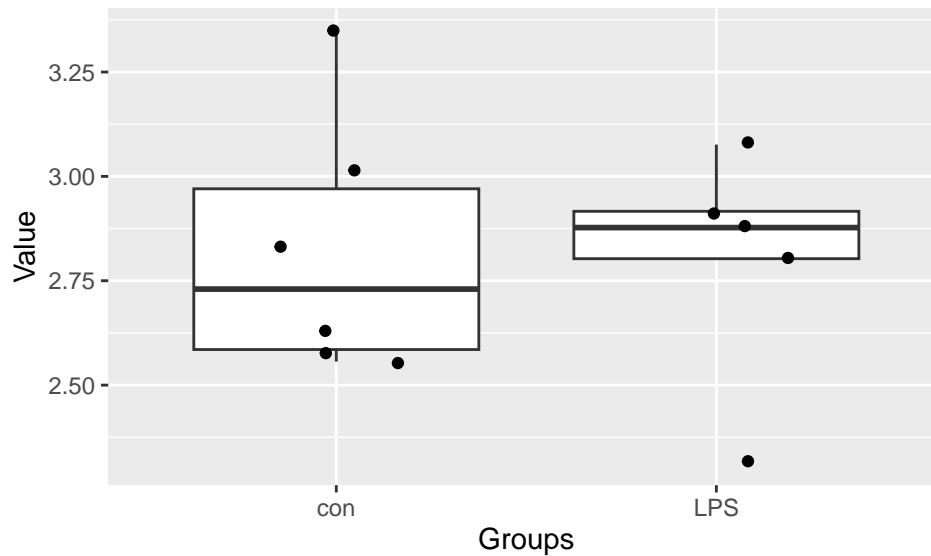

```
##  
## Welch Two Sample t-test  
##  
## data:  value by group  
## t = 0.15724, df = 8.8622, p-value = 0.8786  
## alternative hypothesis: true difference in means between group con and group LPS is not equal to 0  
## 95 percent confidence interval:  
## -0.3830683  0.4401533  
## sample estimates:  
## mean in group con mean in group LPS  
##      2.825541      2.796999
```

```
## The result of t-test:  
## p = 0.879  
## A statistically significant difference do not exist between groups
```

## Fig5\_C.LPS post 12days\_RCRu Data analysis

### Data structure

```
str(d1)
```

```
## 'data.frame':  11 obs. of  4 variables:
## $ subject: int  1 2 3 4 5 6 7 8 9 10 ...
## $ group  : chr  "con" "con" "con" "con" ...
## $ RCRu   : num  2.42 2.44 2.77 2.76 1.7 ...
## $ X      : logi  NA NA NA NA NA NA ...
```

### Explorative data analysis with graphics

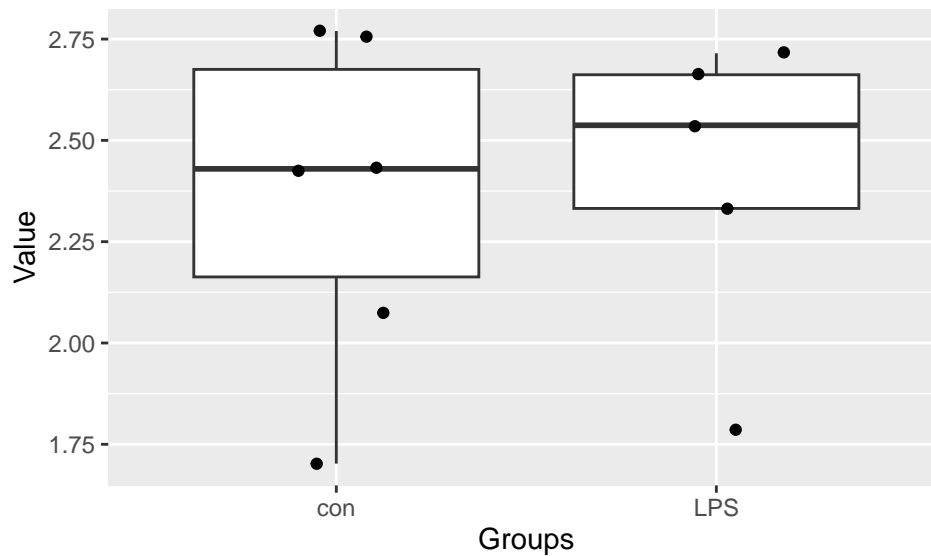

```
##
## Welch Two Sample t-test
##
## data:  value by group
## t = -0.18985, df = 8.8747, p-value = 0.8537
## alternative hypothesis: true difference in means between group con and group LPS is not equal to 0
## 95 percent confidence interval:
## -0.5858532  0.4953106
## sample estimates:
## mean in group con mean in group LPS
##      2.360459      2.405730
```

```
## The result of t-test:  
## p = 0.854  
## A statistically significant difference do not exist between groups
```

# Fig5\_D.LPS post12days\_Western Blot\_ATP5A Data analysis

## Data structure

```
str(d1)
```

```
## 'data.frame':  11 obs. of  3 variables:  
## $ subject: int  1 2 3 4 5 6 7 8 9 10 ...  
## $ group  : chr  "con" "con" "con" "con" ...  
## $ ATP5A  : num  1.499 0.915 0.794 0.847 0.945 ...
```

## Explorative data analysis with graphics

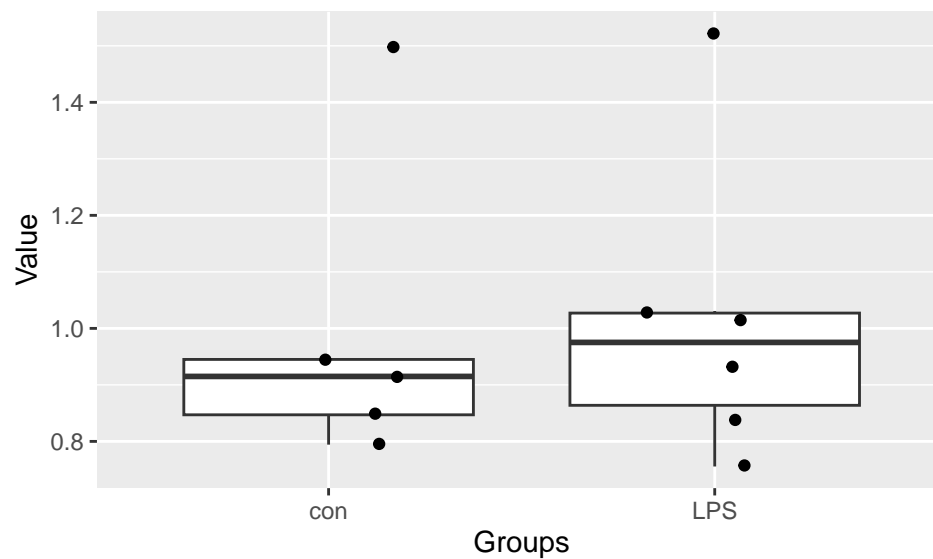

```
##  
## Welch Two Sample t-test  
##  
## data: value by group  
## t = -0.096501, df = 8.4178, p-value = 0.9254  
## alternative hypothesis: true difference in means between group con and group LPS is not equal to 0  
## 95 percent confidence interval:  
## -0.4003083 0.3678833  
## sample estimates:  
## mean in group con mean in group LPS  
## 1.000000 1.016212
```

```
## The result of t-test:  
## p = 0.925  
## A statistically significant difference do not exist between groups
```



# Fig5\_D.LPS post12days\_Western Blot\_UQCRC2 Data analysis

## Data structure

```
str(d1)
```

```
## 'data.frame':  11 obs. of  3 variables:  
## $ subject: int  1 2 3 4 5 6 7 8 9 10 ...  
## $ group  : chr  "con" "con" "con" "con" ...  
## $ UQCRC2 : num  1.442 0.962 0.75 0.903 0.944 ...
```

## Explorative data analysis with graphics

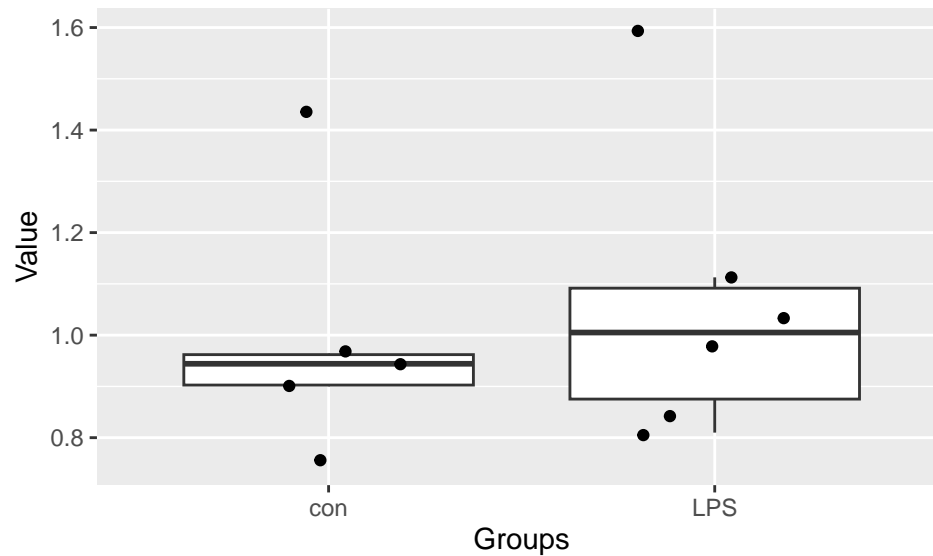

```
##  
## Welch Two Sample t-test  
##  
## data:  value by group  
## t = -0.37111, df = 8.8859, p-value = 0.7192  
## alternative hypothesis: true difference in means between group con and group LPS is not equal to 0  
## 95 percent confidence interval:  
## -0.4344562  0.3122043  
## sample estimates:  
## mean in group con mean in group LPS  
##      1.000000      1.061126
```

```
## The result of t-test:  
## p = 0.719  
## A statistically significant difference do not exist between groups
```

# Fig5\_D.LPS post12days\_Western Blot\_SDHB Data analysis

## Data structure

```
str(d1)
```

```
## 'data.frame':  11 obs. of  3 variables:  
## $ subject: int  1 2 3 4 5 6 7 8 9 10 ...  
## $ group  : chr  "con" "con" "con" "con" ...  
## $ SDHB   : num  1.243 1.006 0.857 0.863 1.032 ...
```

## Explorative data analysis with graphics

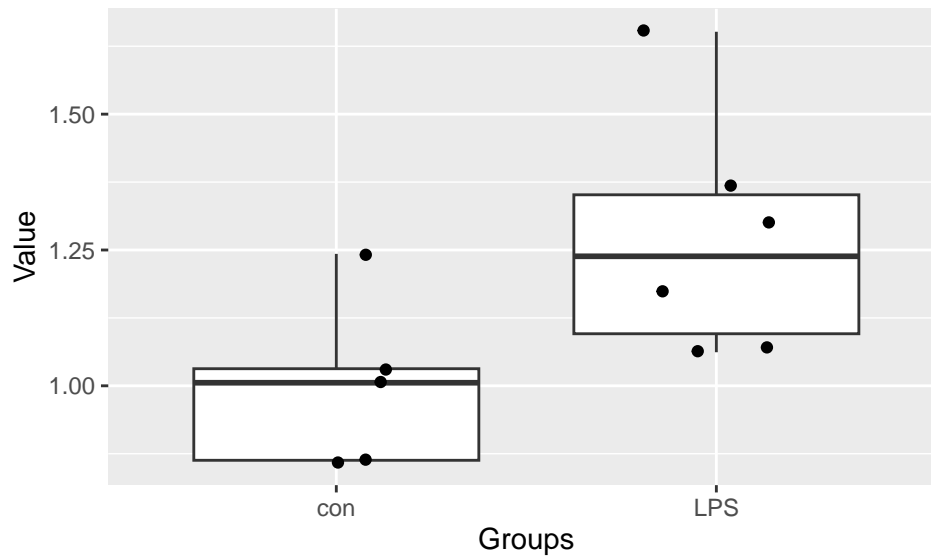

```
##  
## Welch Two Sample t-test  
##  
## data: value by group  
## t = -2.3563, df = 8.8241, p-value = 0.04339  
## alternative hypothesis: true difference in means between group con and group LPS is not equal to 0  
## 95 percent confidence interval:  
## -0.53256966 -0.01004734  
## sample estimates:  
## mean in group con mean in group LPS  
## 1.000000 1.271308
```

```
## The result of t-test:  
## p = 0.043  
## A statistically significant difference exist between groups
```

# Fig5\_D.LPS post12days\_Western Blot\_NDUFB8 Data analysis

## Data structure

```
str(d1)
```

```
## 'data.frame':  11 obs. of  3 variables:  
## $ subject: int  1 2 3 4 5 6 7 8 9 10 ...  
## $ group  : chr  "con" "con" "con" "con" ...  
## $ NDUFB8 : num  0.947 1.073 0.915 1.076 0.99 ...
```

## Explorative data analysis with graphics

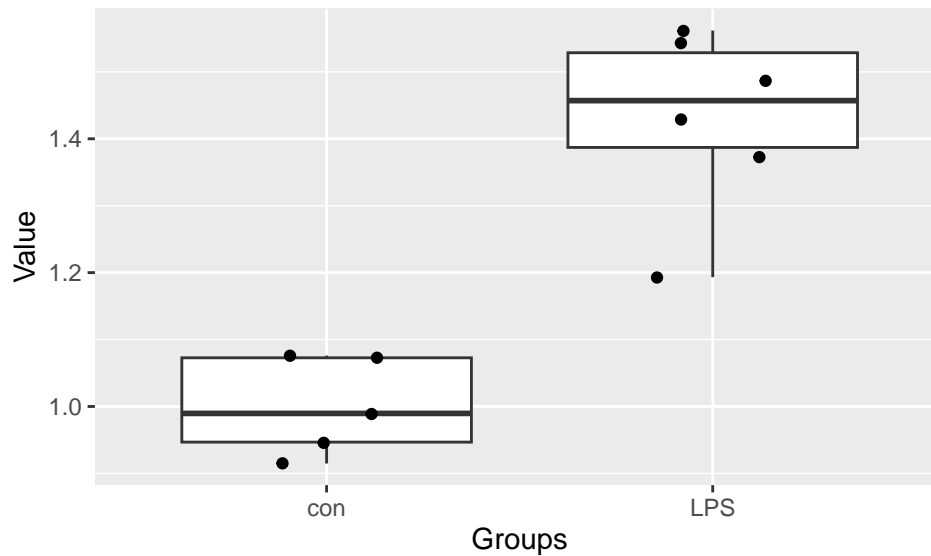

```
##  
## Welch Two Sample t-test  
##  
## data:  value by group  
## t = -6.6908, df = 7.8733, p-value = 0.0001657  
## alternative hypothesis: true difference in means between group con and group LPS is not equal to 0  
## 95 percent confidence interval:  
## -0.5798256 -0.2819721  
## sample estimates:  
## mean in group con mean in group LPS  
## 1.000000 1.430899
```

```
## The result of t-test:  
## p = 0  
## A statistically significant difference exist between groups
```

# Fig5\_E.LPS post12days\_qPCR\_TNFalpha Data analysis

## Data structure

```
str(d1)
```

```
## 'data.frame':  11 obs. of  3 variables:  
## $ subject : int  1 2 3 4 5 6 7 8 9 10 ...  
## $ group   : chr  "con" "con" "con" "con" ...  
## $ TNFalpha: num  0.0408 0.9734 1.1966 1.6939 1.0954 ...
```

## Explorative data analysis with graphics

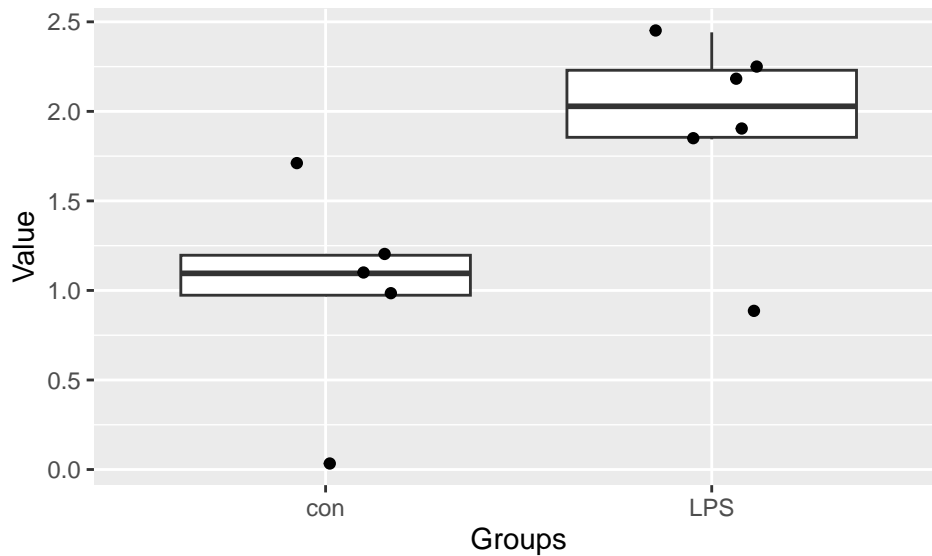

```
##  
## Welch Two Sample t-test  
##  
## data:  value by group  
## t = -2.5837, df = 8.3429, p-value = 0.03134  
## alternative hypothesis: true difference in means between group con and group LPS is not equal to 0  
## 95 percent confidence interval:  
## -1.7172062 -0.1036434  
## sample estimates:  
## mean in group con mean in group LPS  
## 1.000000 1.910425
```

```
## The result of t-test:  
## p = 0.031  
## A statistically significant difference exist between groups
```



# Fig5\_E.LPS post12days\_qPCR\_IL-1beta Data analysis

## Data structure

```
str(d1)
```

```
## 'data.frame':  11 obs. of  3 variables:  
## $ subject : int  1 2 3 4 5 6 7 8 9 10 ...  
## $ group   : chr  "con" "con" "con" "con" ...  
## $ IL.1beta: num  0.0496 0.6713 1.2766 1.9053 1.0972 ...
```

## Explorative data analysis with graphics

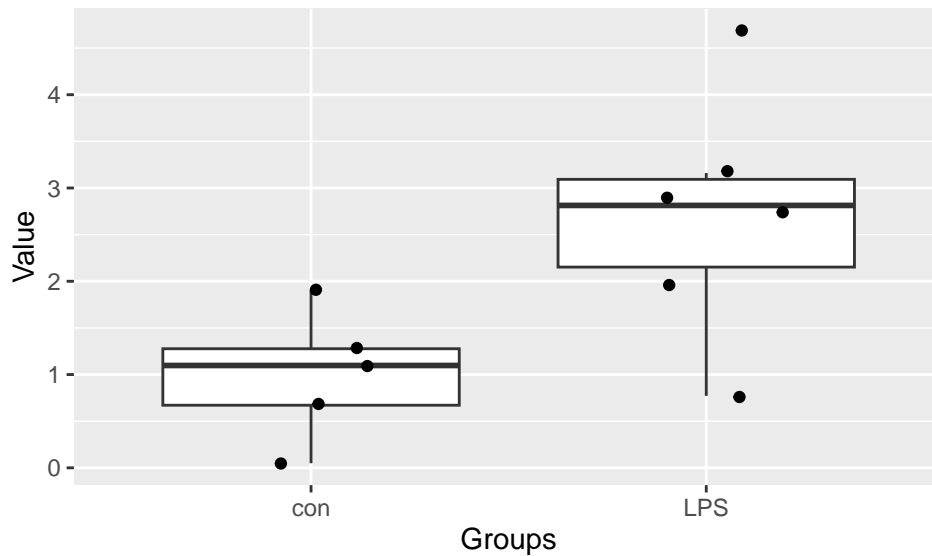

```
##  
## Welch Two Sample t-test  
##  
## data: value by group  
## t = -2.7683, df = 7.8542, p-value = 0.0248  
## alternative hypothesis: true difference in means between group con and group LPS is not equal to 0  
## 95 percent confidence interval:  
## -3.1176097 -0.2790193  
## sample estimates:  
## mean in group con mean in group LPS  
## 1.000000 2.698314
```

```
## The result of t-test:  
## p = 0.025  
## A statistically significant difference exist between groups
```

## Fig5\_E.LPS post12days\_qPCR\_IL-10 Data analysis

### Data structure

```
str(d1)
```

```
## 'data.frame':  11 obs. of  3 variables:  
## $ subject: int  1 2 3 4 5 6 7 8 9 10 ...  
## $ group  : chr  "con" "con" "con" "con" ...  
## $ IL.10  : num  0.0443 0.6266 1.4268 2.2333 0.6691 ...
```

### Explorative data analysis with graphics

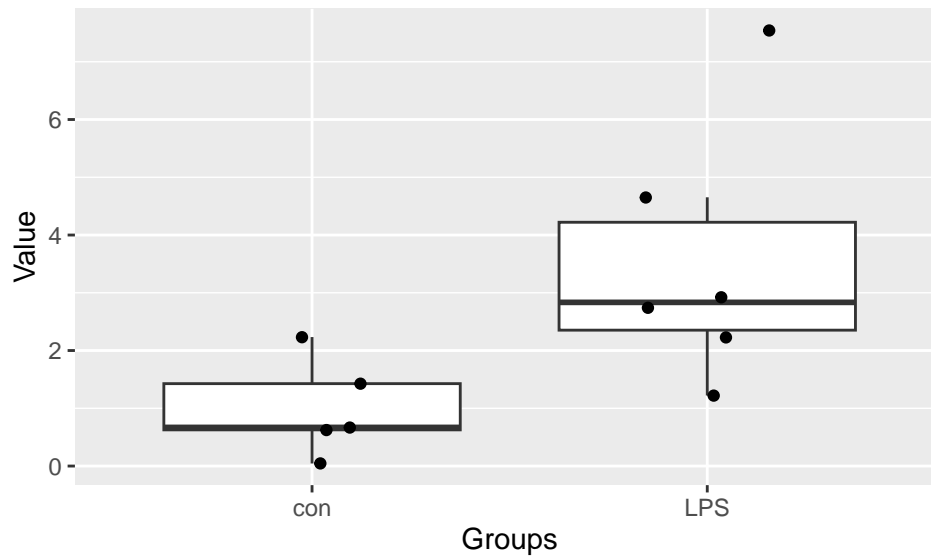

```
##  
## Welch Two Sample t-test  
##  
## data: value by group  
## t = -2.5659, df = 6.6022, p-value = 0.03914  
## alternative hypothesis: true difference in means between group con and group LPS is not equal to 0  
## 95 percent confidence interval:  
## -4.9301722 -0.1710328  
## sample estimates:  
## mean in group con mean in group LPS  
## 1.000000 3.550603
```

```
## The result of t-test:  
## p = 0.039  
## A statistically significant difference exist between groups
```

# Fig5\_E.LPS post12days\_qPCR\_IL-6 Data analysis

## Data structure

```
str(d1)
```

```
## 'data.frame':  12 obs. of  3 variables:  
## $ subject: int  1 2 3 4 5 6 7 8 9 10 ...  
## $ group  : chr  "con" "con" "con" "con" ...  
## $ IL.6   : num  0.0392 0.8073 1.1459 1.8392 1.1683 ...
```

## Explorative data analysis with graphics

```
## Warning: Removed 1 rows containing non-finite values ('stat_boxplot()').
```

```
## Warning: Removed 1 rows containing missing values ('geom_point()').
```

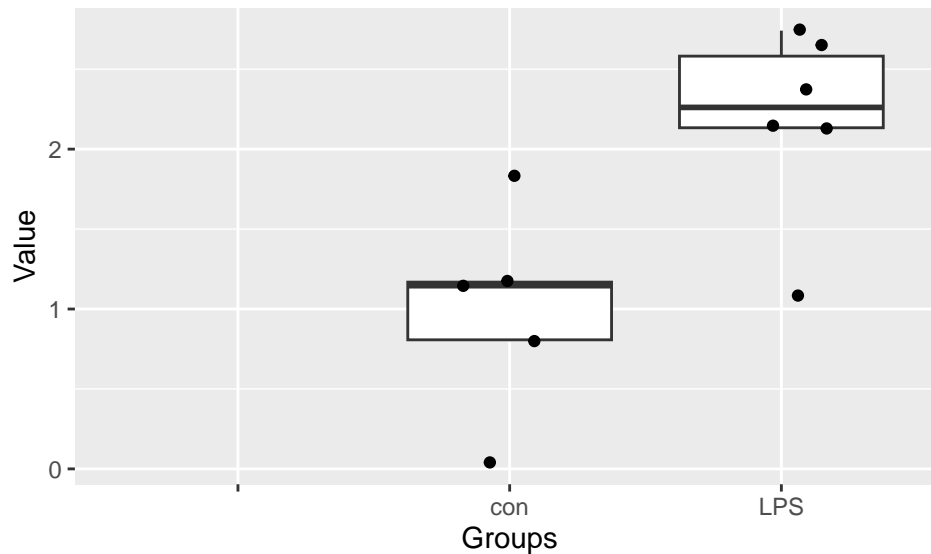

```
##  
## Welch Two Sample t-test  
##  
## data:  value by group  
## t = -3.1209, df = 8.2748, p-value = 0.01363  
## alternative hypothesis: true difference in means between group con and group LPS is not equal to 0  
## 95 percent confidence interval:
```

```
## -2.0606989 -0.3152477
## sample estimates:
## mean in group con mean in group LPS
##      1.000000      2.187974

## The result of t-test:
## p = 0.014
## A statistically significant difference exist between groups
```

# **SFigure3 Statistics**

# SFig3\_A.Weight change\_old mice Data analysis

Boohwi Hong

## Package install

## Data import

## Data structure

```
str(d1)
```

```
## 'data.frame': 168 obs. of 4 variables:  
## $ subject: int 1 2 3 4 5 6 7 8 9 10 ...  
## $ group : chr "con" "con" "con" "con" ...  
## $ trial : chr "day1" "day1" "day1" "day1" ...  
## $ value : num 58.8 37.7 36.2 50.6 41.4 46.4 34.7 56.2 37.1 61.5 ...
```

```
shapiro.test(d1$value)
```

```
##  
## Shapiro-Wilk normality test  
##  
## data: d1$value  
## W = 0.91534, p-value = 2.68e-08
```



## Explorative data analysis with graphics

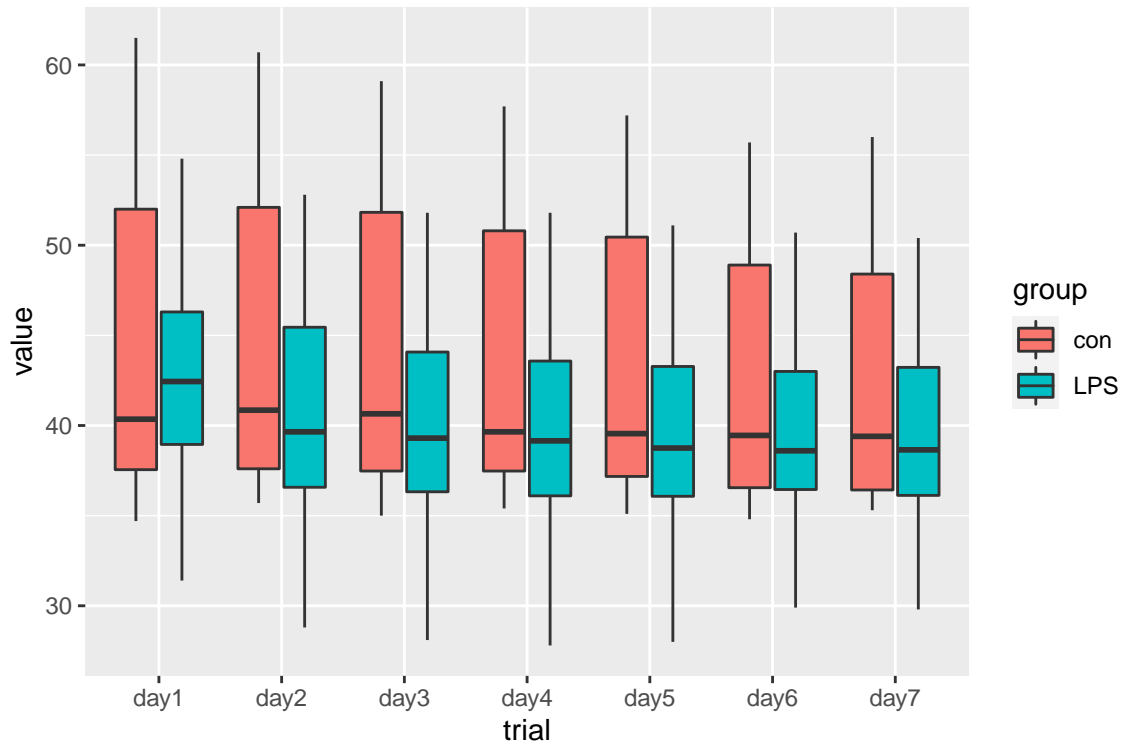

## Model fit

```
## F1 LD F1 Model
## -----
## Check that the order of the time and group levels are correct.
## Time level:  day1 day2 day3 day4 day5 day6 day7
## Group level:  con LPS
## If the order is not correct, specify the correct order in time.order or group.order.

##           Statistic df      p-value
## group      0.5648481  1 4.523134e-01
## trial     66.0676676  6 2.610687e-12
## group:trial 27.4589490  6 1.187700e-04

##           Statistic      df      p-value
## group      0.5648481  1.000000 4.523134e-01
## trial     19.7575777  3.150668 2.510144e-13
## group:trial  5.2076801  3.150668 1.099718e-03

##           Statistic df1      df2      p-value
## group 0.5648481    1 21.37913 0.4605076
```

## Interpretation of result

## 1. Difference do not exist between groups

## p = 0.452

## 2. Difference exist between measurement points

## p = 0.000

## 3. Significant interaction exist between groups and measurement points

## p = 0.001

# **SFigure4 Statistics**

# SFig4\_B.Weight change\_young mice

## Data analysis using R

Boohwi Hong

### Package install

### Data import

### Data structure

```
str(d1)
```

```
## 'data.frame': 147 obs. of 4 variables:
## $ subject: int 1 2 3 4 5 6 7 8 9 10 ...
## $ group : chr "con" "con" "con" "con" ...
## $ trial : int 1 1 1 1 1 1 1 1 1 1 ...
## $ value : num 22.3 22.6 22.5 22.1 22.2 20.9 20.8 22.2 23.7 20.6 ...
```

```
shapiro.test(d1$value)
```

```
##
## Shapiro-Wilk normality test
##
## data: d1$value
## W = 0.98605, p-value = 0.1453
```

## Explorative data analysis with graphics

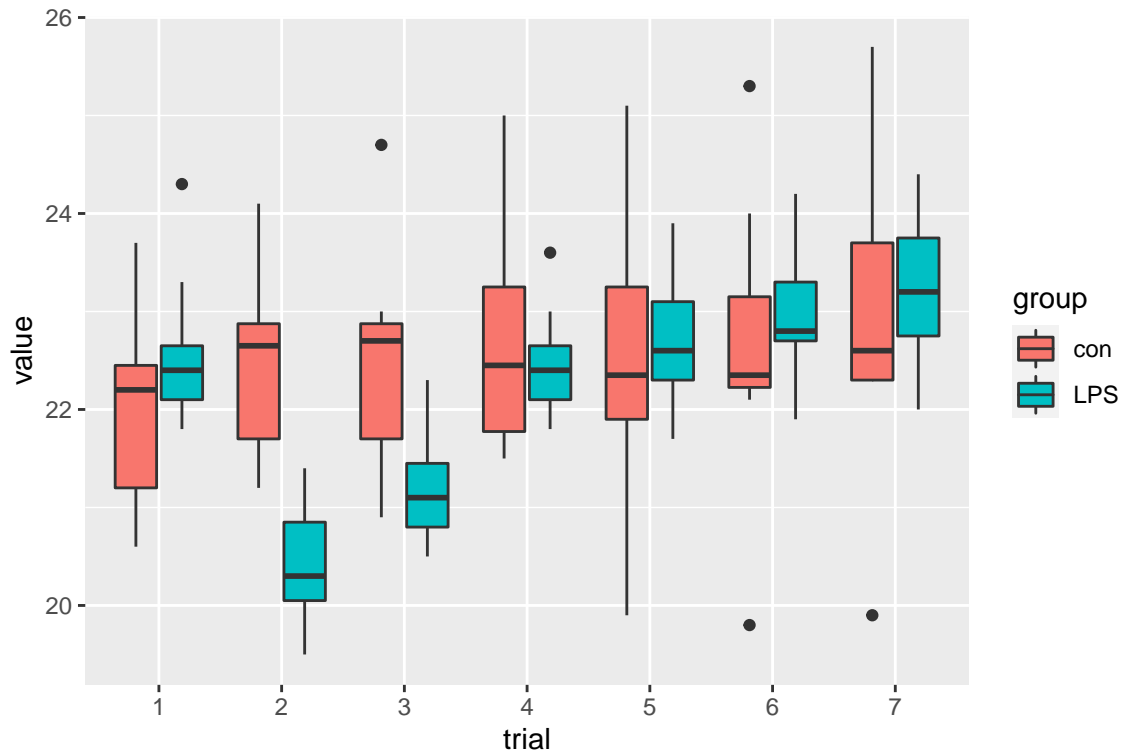

## Model fit

```
## F1 LD F1 Model
## -----
## Check that the order of the time and group levels are correct.
## Time level:  1 2 3 4 5 6 7
## Group level:  con LPS
## If the order is not correct, specify the correct order in time.order or group.order.
```

```
##           Statistic df      p-value
## group      0.2433831  1 6.217733e-01
## trial     243.7402435  6 8.920105e-50
## group:trial 166.6527361  6 2.305558e-33
```

```
##           Statistic      df      p-value
## group      0.2433831  1.000000 6.217733e-01
## trial     34.8836471  2.423213 1.069379e-18
## group:trial 25.5893804  2.423213 7.798253e-14
```

```
##           Statistic df1      df2      p-value
## group 0.2433831    1 13.62635 0.6296289
```

## Interpretation of result

## 1. Difference do not exist between groups

## p = 0.622

## 2. Difference exist between measurement points

## p = 0.000

## 3. Significant interaction exist between groups and measurement points

## p = 0.000

# SFig4\_C.Barnes maze\_Primary Latency

## Data analysis using R

Boohwi Hong

### Package install

### Data import

### Data structure

```
str(d1)
```

```
## 'data.frame': 104 obs. of 4 variables:  
## $ subject: int 1 2 3 4 5 6 7 8 9 10 ...  
## $ group : chr "con" "con" "con" "con" ...  
## $ trial : chr "day1" "day1" "day1" "day1" ...  
## $ value : num 109.6 54.2 86.8 22.5 12.5 ...
```

```
shapiro.test(d1$value)
```

```
##  
## Shapiro-Wilk normality test  
##  
## data: d1$value  
## W = 0.77465, p-value = 2.48e-11
```

## Explorative data analysis with graphics

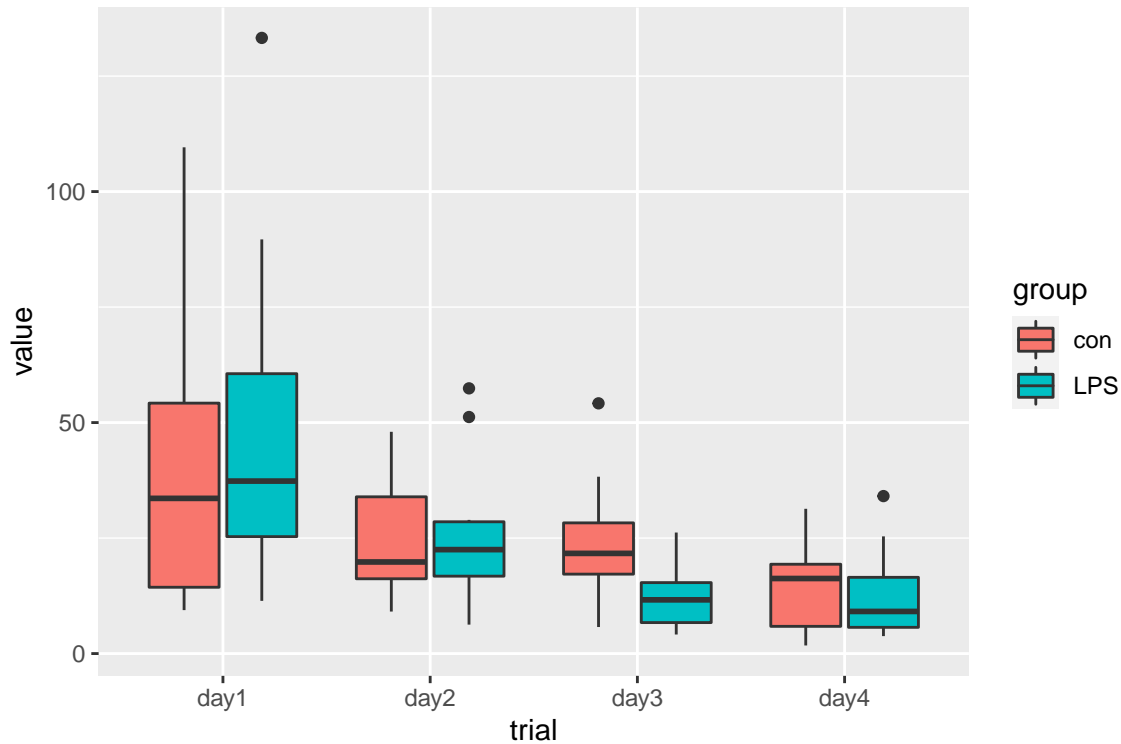

## Model fit

```
## F1 LD F1 Model
## -----
## Check that the order of the time and group levels are correct.
## Time level:  day1 day2 day3 day4
## Group level:  con LPS
## If the order is not correct, specify the correct order in time.order or group.order.
```

```
##           Statistic df      p-value
## group      0.9161287  1 3.384935e-01
## trial     25.9708385  3 9.672436e-06
## group:trial 10.9809187  3 1.182950e-02
```

```
##           Statistic      df      p-value
## group      0.9161287 1.000000 3.384935e-01
## trial     13.5174527 2.442487 1.396969e-07
## group:trial  2.6711862 2.442487 5.760378e-02
```

```
##           Statistic df1      df2      p-value
## group 0.9161287    1 19.72832 0.3500769
```



## Interpretation of result

## 1. Difference do not exist between groups

## p = 0.338

## 2. Difference exist between measurement points

## p = 0.000

## 3. Significant interaction do not exist between groups and measurement points

## p = 0.058

# SFig4\_C.Barnes maze\_Primary Length

## Data analysis using R

Boohwi Hong

### Package install

### Data import

### Data structure

```
str(d1)
```

```
## 'data.frame': 104 obs. of 4 variables:
## $ subject: int 1 2 3 4 5 6 7 8 9 10 ...
## $ group : chr "con" "con" "con" "con" ...
## $ trial : chr "day1" "day1" "day1" "day1" ...
## $ value : num 767 486 586 159 147 ...
```

```
shapiro.test(d1$value)
```

```
##
## Shapiro-Wilk normality test
##
## data: d1$value
## W = 0.84312, p-value = 4.035e-09
```

## Explorative data analysis with graphics

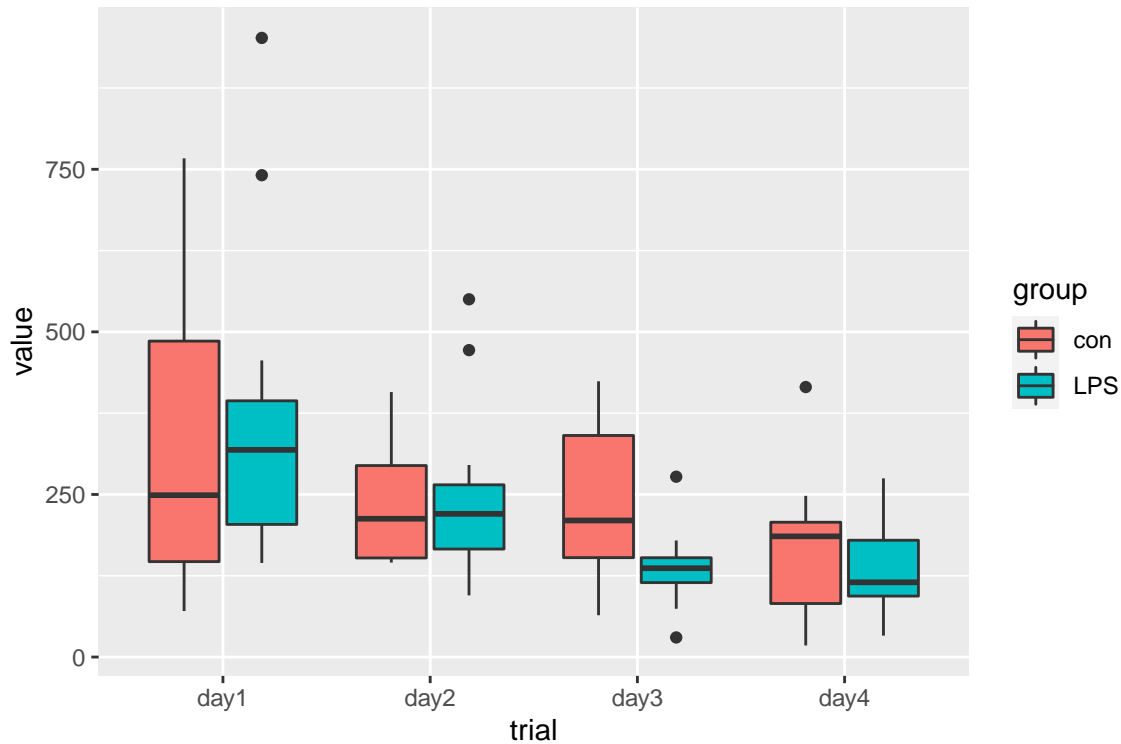

## Model fit

```
## F1 LD F1 Model
## -----
## Check that the order of the time and group levels are correct.
## Time level:  day1 day2 day3 day4
## Group level:  con LPS
## If the order is not correct, specify the correct order in time.order or group.order.
```

```
##           Statistic df      p-value
## group      1.46433  1 0.2262423495
## trial     16.96125  3 0.0007198289
## group:trial 11.59238  3 0.0089182821
```

```
##           Statistic      df      p-value
## group      1.464330 1.000000 2.262423e-01
## trial      8.791257 2.513427 3.329876e-05
## group:trial 3.251618 2.513427 2.809445e-02
```

```
##           Statistic df1      df2      p-value
## group      1.46433   1 19.36389 0.2408078
```

## Interpretation of result

## 1. Difference do not exist between groups

## p = 0.226

## 2. Difference exist between measurement points

## p = 0.000

## 3. Significant interaction exist between groups and measurement points

## p = 0.028

# SFig4\_C.Barnes maze\_Primary errors

## Data analysis using R

Boohwi Hong

### Package install

### Data import

### Data structure

```
str(d1)
```

```
## 'data.frame': 104 obs. of 4 variables:  
## $ subject: int 1 2 3 4 5 6 7 8 9 10 ...  
## $ group : chr "con" "con" "con" "con" ...  
## $ trial : chr "day1" "day1" "day1" "day1" ...  
## $ value : num 9.33 8 4.33 3 4.67 ...
```

```
shapiro.test(d1$value)
```

```
##  
## Shapiro-Wilk normality test  
##  
## data: d1$value  
## W = 0.94974, p-value = 0.0006048
```

## Explorative data analysis with graphics

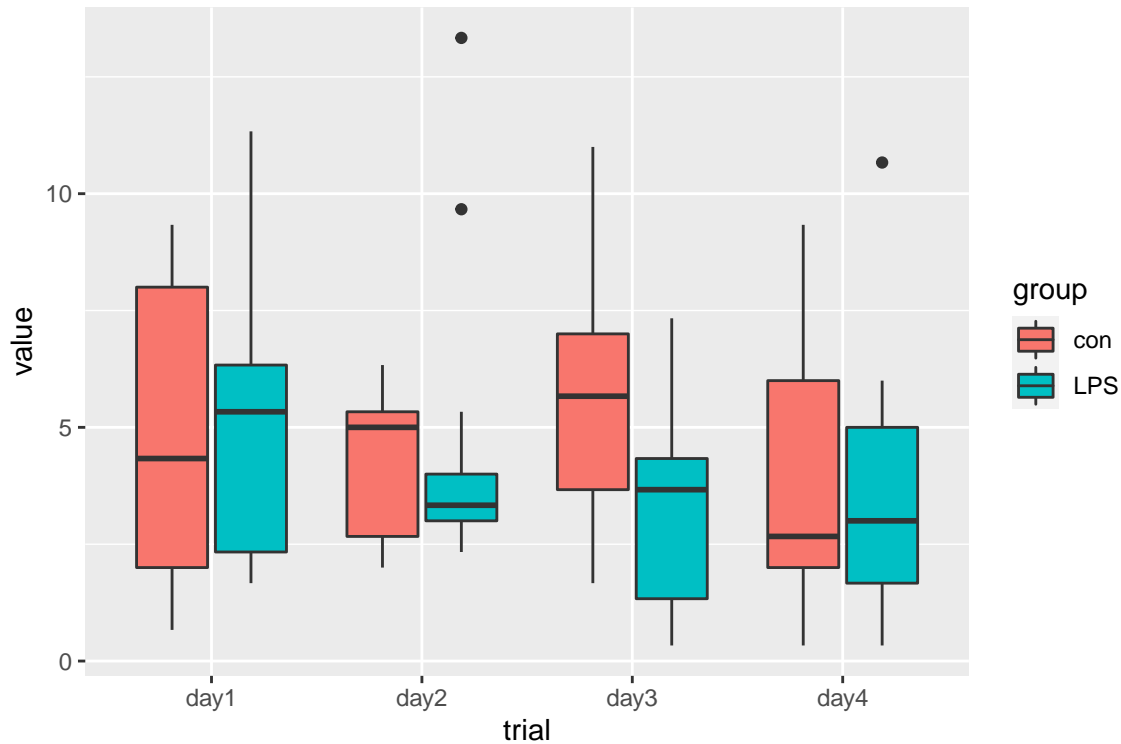

## Model fit

```
## F1 LD F1 Model
## -----
## Check that the order of the time and group levels are correct.
## Time level:  day1 day2 day3 day4
## Group level:  con LPS
## If the order is not correct, specify the correct order in time.order or group.order.
```

```
##           Statistic df    p-value
## group      1.705706  1 0.1915435
## trial      3.351822  3 0.3404949
## group:trial 7.509166  3 0.0573234
```

```
##           Statistic      df    p-value
## group      1.705706 1.000000 0.1915435
## trial      1.008550 2.318053 0.3736065
## group:trial 2.106059 2.318053 0.1134237
```

```
##           Statistic df1      df2    p-value
## group 1.705706    1 20.50936 0.2060027
```

## Interpretation of result

## 1. Difference do not exist between groups

## p = 0.192

## 2. Difference do not exist between measurement points

## p = 0.374

## 3. Significant interaction do not exist between groups and measurement points

## p = 0.113

# SFig4\_D.Barnes maze\_Probe test\_Duration Data analysis

## Data structure

```
str(d1)
```

```
## 'data.frame': 26 obs. of 3 variables:  
## $ subject : int 1 2 3 4 5 6 7 8 9 10 ...  
## $ group : chr "con" "con" "con" "con" ...  
## $ Duration: num 21.1 42.2 44.3 52.3 55 ...
```

## Explorative data analysis with graphics

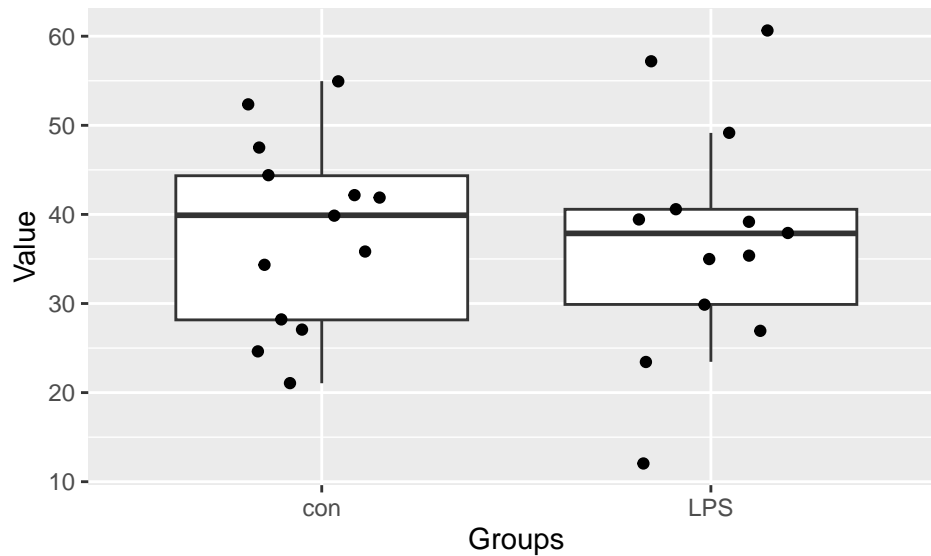

```
##  
## Welch Two Sample t-test  
##  
## data: value by group  
## t = 0.12109, df = 22.951, p-value = 0.9047  
## alternative hypothesis: true difference in means between group con and group LPS is not equal to 0  
## 95 percent confidence interval:  
## -9.165815 10.305399  
## sample estimates:  
## mean in group con mean in group LPS  
## 38.01158 37.44178
```



```
## The result of t-test:  
## p = 0.905  
## A statistically significant difference do not exist between groups
```

# SFig4\_D.Barnes maze\_Probe test\_Distance Data analysis

## Data structure

```
str(d1)
```

```
## 'data.frame': 26 obs. of 3 variables:  
## $ subject : int 1 2 3 4 5 6 7 8 9 10 ...  
## $ group : chr "con" "con" "con" "con" ...  
## $ Distance: num 2.844 2.188 0.227 0.518 0.828 ...
```

## Explorative data analysis with graphics

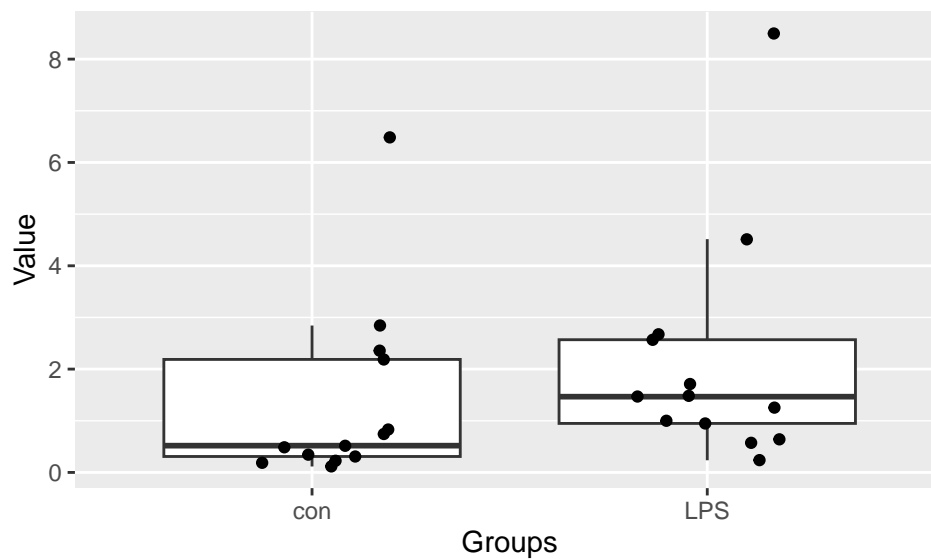

```
##  
## Welch Two Sample t-test  
##  
## data: value by group  
## t = -0.96519, df = 22.975, p-value = 0.3445  
## alternative hypothesis: true difference in means between group con and group LPS is not equal to 0  
## 95 percent confidence interval:  
## -2.404897 0.874766  
## sample estimates:  
## mean in group con mean in group LPS  
## 1.356096 2.121161
```

```
## The result of t-test:  
## p = 0.344  
## A statistically significant difference do not exist between groups
```

# SFig4\_D.Barnes maze\_Probe test\_Latency Data analysis

## Data structure

```
str(d1)
```

```
## 'data.frame': 26 obs. of 3 variables:  
## $ subject: int 1 2 3 4 5 6 7 8 9 10 ...  
## $ group : chr "con" "con" "con" "con" ...  
## $ Latency: num 33.8 15.31 1 3.6 4.57 ...
```

## Explorative data analysis with graphics

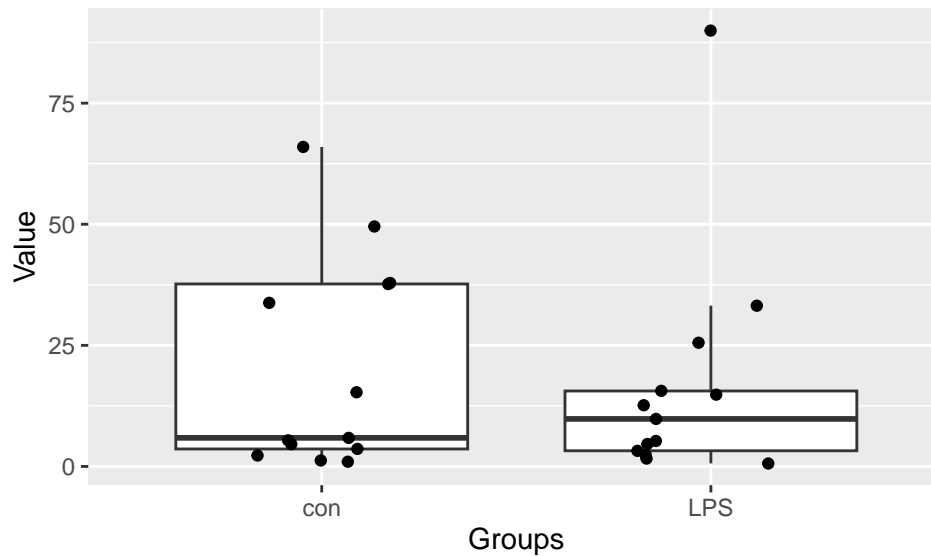

```
##  
## Welch Two Sample t-test  
##  
## data: value by group  
## t = 0.38116, df = 23.8, p-value = 0.7065  
## alternative hypothesis: true difference in means between group con and group LPS is not equal to 0  
## 95 percent confidence interval:  
## -15.19927 22.08109  
## sample estimates:  
## mean in group con mean in group LPS  
## 20.31990 16.87898
```

```
## The result of t-test:  
## p = 0.706  
## A statistically significant difference do not exist between groups
```

# SFig4\_E.Fear chamber test Data analysis

## Data structure

```
str(d1)
```

```
## 'data.frame': 26 obs. of 3 variables:  
## $ subject : int 1 2 3 4 5 6 7 8 9 10 ...  
## $ group : chr "con" "con" "con" "con" ...  
## $ Freezing: num 63.5 58.1 27 61.5 51.4 ...
```

## Explorative data analysis with graphics

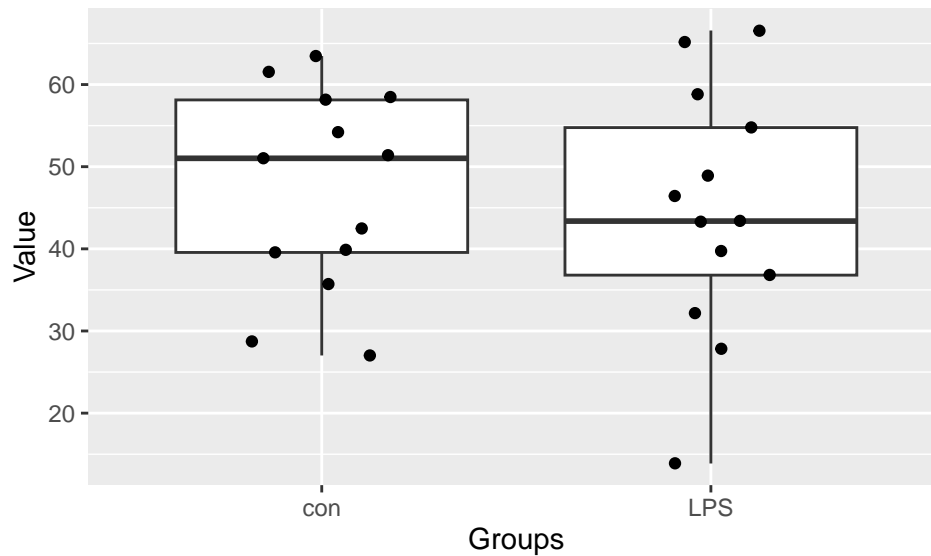

```
##  
## Welch Two Sample t-test  
##  
## data: value by group  
## t = 0.4854, df = 23.103, p-value = 0.632  
## alternative hypothesis: true difference in means between group con and group LPS is not equal to 0  
## 95 percent confidence interval:  
## -8.512873 13.734412  
## sample estimates:  
## mean in group con mean in group LPS  
## 47.04923 44.43846
```

```
## The result of t-test:  
## p = 0.632  
## A statistically significant difference do not exist between groups
```
